# Supplementary material for: Training and education of healthcare workers during viral epidemics: a systematic review
Source: PubMed Central journal article supplement — BMJ Open. 2021 May 28;11(5):e044111. doi: 10.1136/bmjopen-2020-044111 (PMC8166630; doi:10.1136/bmjopen-2020-044111), 2021-05-28
Supplement: bmjopen-2020-044111.draft_revisions.pdf [file bmjopen-2020-044111.draft_revisions.pdf]

# BMJ Open

BMJ Open is committed to open peer review. As part of this commitment we make the peer review history of every article we publish publicly available.

When an article is published we post the peer reviewers' comments and the authors' responses online. We also post the versions of the paper that were used during peer review. These are the versions that the peer review comments apply to.

The versions of the paper that follow are the versions that were submitted during the peer review process. They are not the versions of record or the final published versions. They should not be cited or distributed as the published version of this manuscript.

BMJ Open is an open access journal and the full, final, typeset and author-corrected version of record of the manuscript is available on our site with no access controls, subscription charges or pay-per-view fees (<http://bmjopen.bmj.com>).

If you have any questions on BMJ Open's open peer review process please email [info.bmjopen@bmj.com](mailto:info.bmjopen@bmj.com)

# BMJ Open

## Training and education of healthcare workers during viral epidemics: A systematic review

|                               |                                                                                                                                                                                                                                                                                                                                                                                                                                                                                                                                                                                                                                                                                                                                                                                                                                                                                                                   |
|-------------------------------|-------------------------------------------------------------------------------------------------------------------------------------------------------------------------------------------------------------------------------------------------------------------------------------------------------------------------------------------------------------------------------------------------------------------------------------------------------------------------------------------------------------------------------------------------------------------------------------------------------------------------------------------------------------------------------------------------------------------------------------------------------------------------------------------------------------------------------------------------------------------------------------------------------------------|
| Journal:                      | <i>BMJ Open</i>                                                                                                                                                                                                                                                                                                                                                                                                                                                                                                                                                                                                                                                                                                                                                                                                                                                                                                   |
| Manuscript ID                 | bmjopen-2020-044111                                                                                                                                                                                                                                                                                                                                                                                                                                                                                                                                                                                                                                                                                                                                                                                                                                                                                               |
| Article Type:                 | Original research                                                                                                                                                                                                                                                                                                                                                                                                                                                                                                                                                                                                                                                                                                                                                                                                                                                                                                 |
| Date Submitted by the Author: | 23-Aug-2020                                                                                                                                                                                                                                                                                                                                                                                                                                                                                                                                                                                                                                                                                                                                                                                                                                                                                                       |
| Complete List of Authors:     | Nayahangan, Leizl Joy; Region Hovedstaden, Copenhagen Academy for Medical Education and Simulation (CAMES), Centre for HR and Education and the Capital Region of Denmark<br>Konge, Lars; Region Hovedstaden, Copenhagen Academy for Medical Education and Simulation (CAMES), Centre for HR and Education and the Capital Region of Denmark; University of Copenhagen Faculty of Health and Medical Sciences, Department of Clinical Medicine<br>Russell, Lene ; Rigshospitalet, Department of Intensive Care; Region Hovedstaden, Copenhagen Academy for Medical Education and Simulation (CAMES), Centre for HR and Education and the Capital Region of Denmark<br>Andersen, Steven; Rigshospitalet, Department of Otorhinolaryngology—Head & Neck Surgery; Region Hovedstaden, Copenhagen Academy for Medical Education and Simulation (CAMES), Centre for HR and Education and the Capital Region of Denmark |
| Keywords:                     | COVID-19, MEDICAL EDUCATION & TRAINING, EDUCATION & TRAINING (see Medical Education & Training)                                                                                                                                                                                                                                                                                                                                                                                                                                                                                                                                                                                                                                                                                                                                                                                                                   |
|                               |                                                                                                                                                                                                                                                                                                                                                                                                                                                                                                                                                                                                                                                                                                                                                                                                                                                                                                                   |

SCHOLARONE™  
Manuscripts

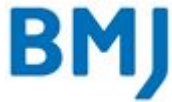

I, the Submitting Author has the right to grant and does grant on behalf of all authors of the Work (as defined in the below author licence), an exclusive licence and/or a non-exclusive licence for contributions from authors who are: i) UK Crown employees; ii) where BMJ has agreed a CC-BY licence shall apply, and/or iii) in accordance with the terms applicable for US Federal Government officers or employees acting as part of their official duties; on a worldwide, perpetual, irrevocable, royalty-free basis to BMJ Publishing Group Ltd ("BMJ") its licensees and where the relevant Journal is co-owned by BMJ to the co-owners of the Journal, to publish the Work in this journal and any other BMJ products and to exploit all rights, as set out in our [licence](#).

The Submitting Author accepts and understands that any supply made under these terms is made by BMJ to the Submitting Author unless you are acting as an employee on behalf of your employer or a postgraduate student of an affiliated institution which is paying any applicable article publishing charge ("APC") for Open Access articles. Where the Submitting Author wishes to make the Work available on an Open Access basis (and intends to pay the relevant APC), the terms of reuse of such Open Access shall be governed by a Creative Commons licence – details of these licences and which [Creative Commons](#) licence will apply to this Work are set out in our licence referred to above.

Other than as permitted in any relevant BMJ Author's Self Archiving Policies, I confirm this Work has not been accepted for publication elsewhere, is not being considered for publication elsewhere and does not duplicate material already published. I confirm all authors consent to publication of this Work and authorise the granting of this licence.

## Training and education of healthcare workers during viral epidemics: A systematic review

Leizl Joy Nayahangan<sup>1</sup>, Lars Konge<sup>1,2</sup>, Lene Russell<sup>1,3</sup>, Steven Arild Wuyts Andersen<sup>1,4,5</sup>

1. Copenhagen Academy for Medical Education and Simulation (CAMES), Centre for HR and Education and the Capital Region of Denmark, Denmark.
2. Department of Clinical Medicine, Faculty of Health and Medical Sciences, University of Copenhagen, Denmark
3. Department of Intensive Care, Rigshospitalet, Copenhagen, Denmark
4. Department of Otolaryngology, Ohio State University, Columbus, Ohio, USA
5. Department of Otorhinolaryngology—Head & Neck Surgery, Rigshospitalet, Copenhagen, Denmark.

### ***Corresponding author:***

Leizl Joy Nayahangan

CAMES Rigshospitalet,

Blegdamsvej 9, Copenhagen, Denmark.

Email: [leizl.joy.nayahangan@regionh.dk](mailto:leizl.joy.nayahangan@regionh.dk).

Contact number: +45 5368 9338

## ABSTRACT

### Objective

This study aimed to explore published literature in relation to training and education for viral epidemics and the effects of these training interventions to inform training of healthcare personnel in light of the ongoing COVID-19 pandemic.

**Design:** Systematic review

### Method

Five databases were searched (PubMed, EMBASE, Cochrane Library, Web of Science and DOAJ) between 1 January 2000 and 24 April 2020 for studies reporting on educational interventions in response to recent major viral outbreaks (SARS, H1N1, MERS, EVD and COVID-19). Descriptive information was extracted and synthesized according to content, competency category, educational methodology, and effects of the educational intervention including level of educational outcome.

### Results

A total of 15,676 records were identified of which 46 studies fulfilled inclusion criteria. Most studies were motivated by Ebola outbreak with doctors and nurses as the primary learners. Traditional didactic methods were commonly used to teach theoretical knowledge on for example infection prevention and control. Simulation-based training was utilized particularly for training of technical skills such as donning and doffing of personal protective equipment and in relation to airway/ventilation management. Evaluation of the interventions consisted mostly of surveys on learner satisfaction and confidence or tests of knowledge and skills. Only three studies investigated transfer to the clinical setting or effect on patient outcomes.

### Conclusion

The included studies relay important educational experiences from past epidemics with a variety of educational content, design, and modes of delivery. High level educational evidence is limited, and implementation remains a challenge. Evidence-based and standardised training programs that are easily adapted locally are recommended in preparation for future outbreaks.

**Keywords:** viral diseases; epidemic; coronavirus; ebolavirus; training

## Strengths and Limitations of this study

- Inclusion of educational interventional studies in the last twenty years, providing an overview of the currently published training programs for HCW and their evidence.
- Systematic search of five academic research databases (PubMed, Excerpta Medica (EMBASE)/Ovid, Cochrane Library, Web of Science, and Directory of Open Access Journals (DOAJ)) was performed following the Preferred Reporting Items for Systematic Reviews and Meta-Analyses (PRISMA) guidelines.
- Systematic review of forty-six studies reporting on training and educational interventions that were developed and implemented in response to five major viral epidemics: SARS, H1N1, EVD, MERS and COVID-19
- Exclusion of descriptive studies reporting on development of training programs without evaluation and those reporting on organizational or system-wide impact of interventions.
- Other important educational efforts that may not have been reported were not included.

Review Only

## INTRODUCTION

Global-scale infectious diseases engender threat, vulnerability, and risk to health and healthcare capacity as well as the economic and political stature of a nation.<sup>1</sup> In the last twenty years, the world has seen several major epidemic outbreaks caused by viral agents—namely severe acute respiratory syndrome (SARS) in 2003,<sup>2</sup> swine flu (H1N1 influenza virus infection)<sup>3</sup> in 2009–2019, Middle East respiratory syndrome (MERS) in 2012,<sup>4</sup> and Ebola virus disease (EVD) in 2014–2016.<sup>5</sup> Currently, the entire world is facing a pandemic with a novel coronavirus disease (COVID-19),<sup>6</sup> demonstrating how a new and fast spreading viral agent can challenge and even overwhelm healthcare delivery and capacity. As with previous large outbreaks, this prompts the need for global communities to swiftly plan, prepare, and ensure continuous healthcare functionality, resource availability, and skilled manpower.<sup>7</sup>

Healthcare professionals from across different areas were called on duty and needed to learn new procedures including correct use of personal protective equipment (PPE)<sup>8</sup> and management of critically ill patients on ventilatory support.<sup>9</sup> To ensure adequate resources and staffing, it was necessary to fast train a large number of healthcare workers (HCW) to be on the frontlines.

Ideally, training and education in preparation for a new infectious threat should be continuous and planned ahead of time. COVID-19 has highlighted that this often is not the case even in well-developed healthcare systems. There remains an urgent need for best practices on development and implementation of training programs during an epidemic.<sup>10</sup>

The overall aim of the study was to provide an overview of the published literature in relation to training and education for a viral epidemic and a status on the evidence of effects of these training interventions. We sought to answer these specific research questions:

1. What are the educational content and types of competencies being trained in relation to HCW as a result of a major viral epidemic?

- 1
  - 2
  - 3
  - 4
  - 5
  - 6
  - 7
  - 8
  - 9
  - 10
  - 11
  - 12
  - 13
  - 14
  - 15
  - 16
  - 17
  - 18
  - 19
  - 20
  - 21
  - 22
  - 23
  - 24
  - 25
  - 26
  - 27
  - 28
  - 29
  - 30
  - 31
  - 32
  - 33
  - 34
  - 35
  - 36
  - 37
  - 38
  - 39
  - 40
  - 41
  - 42
  - 43
  - 44
  - 45
  - 46
  - 47
  - 48
  - 49
  - 50
  - 51
  - 52
  - 53
  - 54
  - 55
  - 56
  - 57
  - 58
  - 59
  - 60
2. How can training be delivered under these conditions?
  3. What are the reported effects of the training interventions?

For peer review only



## METHODS

This systematic review was conducted and reported in adherence with the Preferred Reporting Items for Systematic Reviews and Meta-analyses (PRISMA) guideline.<sup>11</sup>

### *Study eligibility*

We considered all studies on educational or training interventions developed, evaluated and/or implemented in response to major global viral outbreaks transmitted via close person-to-person contact from 2000 to 2020: SARS, H1N1, MERS, EVD, and COVID-19. Inclusion criteria included studies reporting on development, implementation and evaluation of educational interventions for HCW while the exclusion criteria were studies that were not in English language, descriptive studies, and those reporting on organizational outcomes (Table 1).

### *Search strategy*

The search strategy was designed to access published literature in health professions education and clinical journals. Five databases were searched from 1 January 2000–24 April 2020 (PubMed, Excerpta Medica (EMBASE)/Ovid, Cochrane Library, Web of Science, and Directory of Open Access Journals (DOAJ)) using the search terms (*training OR educat\* OR teach\**) AND (*coronavirus OR SARS OR H1N1 OR MERS OR EBOLA OR COVID-19*). See Table 2 for full search details.

### *Study selection*

The search results were retrieved and imported into the Mendeley software (London, UK). Two authors (LJN and SA) independently reviewed and screened titles and abstracts, and eligible studies were included for full-text screening using Covidence (Veritas Health Innovation, Melbourne, Australia). The same reviewers independently screened the studies for eligibility and final inclusion. Disagreements were resolved with the remaining co-authors.

### *Data extraction and synthesis*

A data extraction form was developed in REDCap (Vanderbilt University, USA) and was piloted with five randomly selected studies. Discrepancies in extraction and analysis by the two reviewers were discussed and the form was revised. The following details were extracted: general study information including study design; viral illness; target learner population and learner level; competency category; educational modality; description of intervention; description of educational outcomes; appraisal of the educational intervention;<sup>12</sup> and level of educational outcome based on Kirkpatrick's levels and education evidence.<sup>13</sup> Synthesis was aligned with the three research questions.

## RESULTS

### *Study selection process*

Flow chart is provided in Figure 1. A total of 15,676 records were identified through the searches. Of these, 10,092 studies remained after removal of duplicates and studies not reported in English. Three hundred four studies were included for full-text screening of which 46 studies fulfilled the inclusion criteria (Table S1). Heterogeneity of the included studies precluded metanalysis.

### *Study characteristics*

Study characteristics are presented in Table 3. A majority of the studies reported on learning interventions developed in response to EVD (n=24, 52%),<sup>14-37</sup> eight studies were motivated by SARS (17%),<sup>38-45</sup> seven studies by H1N1 influenza (15%),<sup>46-52</sup> one study by MERS (2%),<sup>53</sup> and three studies were motivated by more than one disease.<sup>54-56</sup> Three studies were published in relation to COVID-19.<sup>57-59</sup>

The majority of the studies used a single-group study design (n=16, 37%) or were educational cohort studies (n=16, 35%). Two were non-randomised trials (4%)<sup>30,41</sup> and only six studies were randomised controlled trials (13%).<sup>15,36,39,44,51,58</sup> Medical doctors and nurses were the targeted learners in most of the studies (n=18 (39%) and n=25 (54%), respectively). Other healthcare professionals included were for example paramedics,<sup>14,53</sup> respiratory therapists,<sup>32,44,52</sup> pharmacists,<sup>37,52,55</sup> and midwives.<sup>33,36,37</sup> Students in relevant fields were included in some studies.<sup>22,23,42,43,49,54,58,59</sup>

### *Educational content and competency category*

*Theoretical knowledge.* Thirty-five studies (76%) reported on development of theoretical courses to educate and inform HCW regarding general principles of epidemic preparedness, disease presentation, surveillance, and treatment. Resources for course content could originate for example from the World Health Organization (WHO), from the Centers for Disease Control

1  
2  
3 and Prevention (CDC)<sup>60</sup> or from official guidelines implemented by local health and infectious  
4 disease authorities to aid the hospitals.<sup>20</sup> Knowledge on infection prevention and control (IPC)  
5 including patient care principles and safety practices were central in many of the included  
6 studies.<sup>17,21,27,30,31,37,41,45,54</sup>  
7  
8  
9

10  
11  
12 *Technical skills.* In 26 studies (57%), the focus was on technical skills particularly on risk  
13 management strategies such as donning and doffing of PPE.<sup>14,15,21,22,25,30-32,34,37,46,53,57,58</sup> One  
14 study reported that while PPE skills can be mastered in a controlled learning environment,  
15 maintaining the integrity of the procedure during critical situations is challenging.<sup>14</sup> Critical  
16 care management skills were also often trained including endotracheal intubation, airway  
17 management techniques, manual and mechanical ventilation;<sup>21,32,54,59</sup> advanced cardiac and  
18 airway life support (ACLS/AALS);<sup>38,40</sup> and extracorporeal membrane oxygenation (ECMO)  
19 management.<sup>47,50</sup>  
20  
21  
22  
23  
24  
25  
26  
27  
28  
29

30  
31 *“Non-technical” skills.* Eight (17%) studies described a variety of other skills such as  
32 teamwork and cognitive load,<sup>15</sup> interpersonal skills, reporting and decision making,<sup>43</sup> attitude,<sup>33</sup>  
33 critical thinking skills,<sup>55</sup> concern and confidence.<sup>26</sup> Psychological support for HCW was  
34 highlighted in three studies that designed educational interventions on psychological first aid<sup>36</sup>  
35 and resilience.<sup>51,56</sup> Another study highlighted the importance of interpersonal skills for  
36 screening personnel to manage the high number of potentially anxious patients and visitors.<sup>43</sup>  
37  
38  
39  
40  
41  
42  
43

#### 44 *Training delivery*

45  
46  
47 *Traditional didactics.* Thirteen out of 46 studies (28%) used traditional didactics such as  
48 lectures and other adult learning strategies including interactive group and learner-led  
49 discussions,<sup>46,48,55</sup> case-based learning,<sup>23,49</sup> problem-based learning,<sup>42</sup> demonstrations/return  
50 demonstrations,<sup>35,43</sup> and role playing.<sup>43,48</sup> Most of the studies that aimed to convey theoretical  
51 knowledge consisted of brief sessions, i.e. less than a day (n=8/13, 62%).<sup>35,36,42-45,55,56</sup>  
52  
53  
54  
55  
56  
57  
58  
59  
60

1  
2  
3 *E-learning.* E-learning has been used to rapidly disseminate information during an epidemic  
4 outbreak. One study found that e-learning could be used to significantly increase knowledge  
5 on a pre- and post-learning test as well as retention test.<sup>26</sup> Other studies used CD/DVD or USB  
6 drives to disseminate course materials for self-learning, as well as audio/ video mini lectures  
7  
8  
9  
10  
11  
12 29,41,51,54 and specific software for interactive online learning.<sup>30,33</sup>

13  
14 *Simulation-based training.* In 31 studies (67%), simulation-based training (SBT) was an  
15 integral part of the training intervention. This ranged from skills stations to practice relevant  
16 clinical procedures such as airway management or central venous catheter placement,<sup>21,32,57</sup> to  
17 the use of high-fidelity and interactive simulation equipment for large scale scenario  
18 training.<sup>18,21,38</sup> The majority of the studies focused on training the correct use of PPE, while a  
19 few studies also used simulation to train interpersonal skills and team training.<sup>32,50,52</sup> The  
20 duration of SBT was variable across studies, ranging from shorter sessions<sup>15,38,58</sup> to multi-day  
21 courses.<sup>20,27,30,31,37,47</sup>

### 32 *Effects and level of educational outcome*

33  
34 Eight out of 46 studies (17%) evaluated the learning outcome at Kirkpatrick level 1 i.e. the  
35 learners' satisfaction and experience with the training intervention. All these studies  
36 concordantly found that learners were satisfied with training regardless of the  
37 intervention.<sup>18,25,31,38,43,47,54,56</sup>

38  
39  
40  
41  
42  
43  
44  
45 Modification of attitude or perceptions (Kirkpatrick level 2a) were an outcome in five studies  
46 (11%). In one of these studies it was reported that the participants felt more confident after the  
47 intervention that consisted of 80 hours of lectures and simulation-based training of care and  
48 management of the infected patient.<sup>21</sup>

49  
50  
51  
52  
53  
54  
55 The majority of the studies (n=29, 63%) reported on modification of knowledge and/or skills  
56 (Kirkpatrick level 2b) resulting from the educational intervention. A significant decrease in  
57 number of errors in donning and doffing of PPE was demonstrated in one study after a single  
58  
59  
60

1  
2  
3 1-hour theoretical session combined with three simulation sessions, which were repeated after  
4  
5 72 hours.<sup>22</sup> A longer 3-day course of e-learning and simulation-based training regarding safety  
6  
7 measures in EVD patient care reported a significant increase in knowledge scores from pre- to  
8  
9 post-intervention as well as an overall high performance in the simulation scenario on PPE  
10  
11 use.<sup>30</sup>  
12  
13  
14

15 Only one study reported on behavioural change in the clinic among the participants who  
16  
17 correctly used PPE after supplemental SBT as compared to the ones who underwent the  
18  
19 standard training (Kirkpatrick level 3).<sup>39</sup> Change in organizational practice (Kirkpatrick level  
20  
21 4a) was reported following simulation-based training in IPC, which led to a decrease in  
22  
23 infection rate amongst HCW.<sup>17</sup> Two studies included Kirkpatrick level 4b evaluation by  
24  
25 demonstrating a benefit to patients or clients directly attributable to the training  
26  
27 intervention.<sup>17,50</sup> In one of these, decreased mortality rates in ECMO patients was found after  
28  
29 implementation of an ECMO training program (66.7% vs. 91.3%,  $p=0.013$ ).<sup>50</sup>  
30  
31  
32  
33  
34  
35  
36  
37  
38  
39  
40  
41  
42  
43  
44  
45  
46  
47  
48  
49  
50  
51  
52  
53  
54  
55  
56  
57  
58  
59  
60

## DISCUSSION

In this systematic review, we identified 46 studies on training and educational interventions for HCW that were developed and implemented due to an ongoing or a recent major viral epidemic.

### *Target population and educational content*

Most of the educational interventions were prompted by the urgent need to train HCW, especially in relation to the EVD outbreak, which had the highest case fatality rate at 40.4% compared with SARS (9.6%), MERS (34%), H1N1 (0.02%), and COVID-19 (3.4% as of 3 March 2020).<sup>61</sup> EVD training programs were initiated for all HCW who were deployed to the frontlines, mainly focused on IPC procedures and the proper use of PPE. For the other viral diseases, a surge of critically ill patients with respiratory failure has prompted many of the simulation-based interventions to train critical care management skills such as ACLS/AALS and ECMO.<sup>38,40,47,50</sup> All these high risk infections also expose HCW to psychological hazards such as fatigue, occupational burnout and distress, furthermore highlighting that psychological support to maintain the well-being of HCW during a pandemic is imperative, as seen in a number of studies.<sup>28,36,56,62</sup>

### *Educational strategies and implementation*

The use of traditional didactic methods to teach theoretical knowledge is common when a large number of learners need to be targeted at the same time. Depending on the learning goals, theoretical knowledge can be efficiently delivered in less than a day, and briefer sessions are particularly efficient if modules are spaced (i.e. distributed learning) as demonstrated in several of the included studies.<sup>22,40,55</sup>

The advent of e-learning, including web-based and other technology enhanced learning, has opened immense opportunities for flexible dissemination of information notwithstanding time and location.<sup>63</sup> This poses an advantage, especially for HCW in remote locations, where

1  
2  
3 learning resources can be accessed in their own time and without potential transmission of  
4 infection between the learners. E-learning is dependent on online access which could be a  
5 challenge in rural communities with limited network coverage.<sup>29</sup> In light of COVID-19, the  
6 WHO Health Emergencies Programme has launched free online training resources, providing  
7 HCW and staff access to real-time knowledge on how to detect, prevent and respond to the  
8 new coronavirus.<sup>64</sup> In medical education, e-learning has been found to have large positive  
9 effects and is especially effective when combined with other educational modalities.<sup>63</sup>

10  
11  
12 SBT has also been increasingly utilized as an integral part of medical training with positive  
13 effects on knowledge, skills and behaviors.<sup>65,66</sup> In the context of a viral outbreak, simulation  
14 provides a safe and controlled environment for training of emergency response including  
15 teamwork and system readiness. This is corroborated by the included studies on PPE, which  
16 found that participants benefitted from repeated training of donning and doffing; of efficiently  
17 performing procedures whilst wearing a constricting PPE; and the use of full-scale scenarios  
18 for team-based training.<sup>32,38</sup>

19  
20  
21 These three major educational strategies can all be used in combination and integrated in a  
22 structured curriculum to achieve an optimized learning experience.<sup>67</sup> Several of the included  
23 studies achieved this for example by using e-learning to provide pre-course materials, allowing  
24 for self-learning prior to course start, then theoretical teaching through lectures and other  
25 interactive learning strategies such as group exercises and discussions, and finally practical  
26 skills training in a simulated setting.<sup>68</sup> Multi-modality and extensive training presents a  
27 challenge especially for countries with limited resources,<sup>69</sup> however, standardised training  
28 programs that are supported by the international communities and the local government bodies  
29 seem to help alleviate this.



### *Effect of training and level of educational outcome*

In the included studies, effect of training varied across educational strategies and mode of evaluation. Interestingly, duration of the training intervention did not seem to correlate with the relative effect on the educational outcome: for example, a 3-day workshop on EVD management resulted in 29% increase in knowledge from pre- to post-workshop<sup>20</sup>; whereas a 3-hr training session on EVD awareness led to a 235% increase in knowledge from baseline to post-intervention<sup>35</sup>. This illustrates that training outcome is very much dependent on the objectives of the training and how it is evaluated. It is also important to be critical in regard to the size of the effects of training reported: a 2-hour session on SARS<sup>41</sup> reported a statistically significant increase in knowledge, however, the actual change in test scores from pre- to post-training intervention was only 3% and therefore of limited consequence.

Most of the included studies reported outcomes of the educational intervention at the level of learner satisfaction (level 1), modification of attitude (level 2a), and modification of knowledge and skills (level 2b) without evaluating if the training affected clinical practice. Learner satisfaction and attitude are typically measured using post-course surveys and changes in knowledge and skills by pre-and post-training tests. Unsurprisingly, these will almost always result in high levels of satisfaction, increase in confidence and improvement in knowledge and skills after intervention. Further, these outcomes provide little to no information on actual performance and translation into improved performance in the clinical environment and/or patient outcomes.<sup>70</sup>

### *Implications and perspectives*

The current pandemic has highlighted that despite many relevant training interventions already developed, implementation remains a challenge. There is a need for structured and evidence-based training programs that are easily replicated and adaptable to local contexts and settings.<sup>12</sup> Development of educational interventions should follow a systematic approach for example Kern's six-step model:<sup>67</sup> starting with a general needs assessment to identify gaps and learner needs; a targeted needs assessment to align to targeted context; definition of goals and objectives including plans for assessment to ensure that the learning goals are met and that learning outcomes are measured appropriately (i.e. knowledge and skills transfer into the clinical environment);<sup>71,72</sup> selection of educational modalities, which could include different categories of knowledge, technical skills and "non-technical" skills);<sup>67,73</sup> and finally, plans for implementation and evaluation of the training program.

Training should be optimized and implemented based on learning needs, conditions and resources, allowing for deliberate and distributed practice over time.<sup>74</sup> Assessment of the effect of learning interventions plays a critical role and ultimately, provides evidence for improved patient outcomes.<sup>67,75</sup> At present, evidence regarding training and education in preparation for a viral epidemic is sparse and none any of the interventions included in this review has followed a structured model for curriculum development nor has undergone rigorous evaluation.

We recommend medical educators to share and publish their experiences as additional resources, in keeping with high standards and collect evidence for their educational interventions.<sup>76</sup> Interestingly, we note that scientific studies spike during or shortly after the onset of the viral epidemic and tend to decline after a few years. With more than 61,000 studies found in PubMed relating to the five viral diseases, less than 6% relates to education and training and of these, only 46 were educational interventional studies. This further highlights

1  
2  
3 the need for careful planning and refinement of training interventions also post-epidemic by  
4 systematically improving educational approach, study design and outcome measures so that  
5 these efforts can prepare the medical community best possibly for the next epidemic.  
6  
7 Educational research should not solely be performed during an ongoing viral epidemic where  
8 the stakes are high and the conditions for teaching and training are far from optimal.  
9  
10  
11  
12  
13

### 14 15 *Strengths and limitations*

16  
17  
18 A strength of this review is the inclusion of educational interventional studies in the last twenty  
19 years, providing an overview of the currently published training programs for HCW and their  
20 evidence. A limitation relates the exclusion of descriptive studies reporting on the development  
21 of training programs without evaluation. Many of the included studies were not conducted to  
22 the highest standards in medical education and published in minor clinical journals. We also  
23 think that there is a substantial educational effort that goes unreported. Finally, we did not  
24 include studies that solely evaluated organizational or system-wide impact of interventions  
25 because we aimed in this review to focus on how to train HCW rather than how to improve  
26 systems through training.  
27  
28  
29  
30  
31  
32  
33  
34  
35  
36  
37  
38

### 39 40 *Conclusion*

41  
42  
43 Published educational interventional studies in relation to training during viral epidemics  
44 demonstrate a scattered focus across educational content, design, strategies and modes of  
45 delivery. Overall, the included studies consistently reported positive benefits of any structured  
46 training intervention including positive effects on confidence and knowledge. However, there  
47 are very few studies evaluating that these training efforts transfer into improved clinical  
48 performance and better patient outcomes. Development and implementation of standardised  
49 training programs that can be easily adapted locally are required for the medical community to  
50 be well-prepared for the next viral epidemic outbreak.  
51  
52  
53  
54  
55  
56  
57  
58  
59  
60

1  
2  
3 **Contributors:** All authors have contributed substantially from conception to writing the final  
4 version of the manuscript. LJN, LR, LK and SA were involved in the design of the study. LJN  
5 and SA performed the systematic search, including review and screening for inclusion. LR and  
6 LK participated in resolution of disagreements. LJN, LR, LK and SA were involved in the  
7 analysis, synthesis and interpretation of the data. LJN wrote the first draft of the paper with  
8 supervision from SA. All authors were involved in the revision of the manuscript for relevant  
9 scientific content and have approved the final version of the manuscript.

10  
11  
12  
13  
14  
15  
16  
17  
18  
19 **Acknowledgements:** The authors sincerely thank Jonathan Lawaetz for developing the data  
20 extraction form in RedCap, and for organising the data derived from the system.

21  
22  
23  
24 **Ethical approval:** This review did not involve patients and was therefore exempt from ethical  
25 approval according to Danish legislation.

26  
27  
28  
29 **Patient and public involvement:** There were no patients nor the public that were involved in  
30 the design, or conduct, or reporting, or dissemination plans of this systematic review.

31  
32  
33 **Patient consent for publication:** Not required

34  
35  
36  
37 **Conflicts of interest:** All authors do not have any conflicts of interest nor disclosures to declare.

38  
39 **Financial disclosures:** No funding

40  
41  
42  
43  
44  
45  
46  
47  
48  
49  
50  
51  
52  
53  
54  
55  
56  
57  
58  
59  
60 **Data sharing statement:** Summary of data was included as a supplemental material. No  
additional data available.

## REFERENCES

1. Smith KF, Goldberg M, Rosenthal S, et al. Global rise in human infectious disease outbreaks. *J R Soc Interface*. 2014;11(101):20140950.
2. Peiris JS, Yuen KY, Osterhaus AD, Stöhr K. The severe acute respiratory syndrome. *N Engl J Med*. 2003;349(25):2431-2441.
3. Coker R. Swine flu. *BMJ*. 2009;338:b1791.
4. Zumla A, Hui DS, Perlman S. Middle East respiratory syndrome. *The Lancet*. 2015;386(9997):995-1007.
5. WHO Ebola Response Team, Aylward B, Barboza P, et al.. Ebola virus disease in West Africa—the first 9 months of the epidemic and forward projections. *N Engl J Med*. 2014;371(16):1481-1495.
6. Phelan AL, Katz R, Gostin LO. The Novel Coronavirus Originating in Wuhan, China: Challenges for Global Health Governance. *JAMA*. 2020.
7. Fineberg HV. Pandemic preparedness and response--lessons from the H1N1 influenza of 2009. *N Engl J Med*. 2014;370(14):1335-1342.
8. Maxwell DN, Perl TM, Cutrell JB. "The Art of War" in the Era of Coronavirus Disease 2019 (COVID-19). *Clin Infect Dis*. 2020.
9. Phua J, Weng L, Ling L, et al. Intensive care management of coronavirus disease 2019 (COVID-19): challenges and recommendations. *Lancet Respir Med*. 2020;8(5):506-517.
10. Li L, Xv Q, Yan J. COVID-19: the need for continuous medical education and training. *Lancet Respir Med*. 2020;8(4):e23.

- 1  
2  
3 11. Moher D, Liberati A, Tetzlaff J, Altman DG. Preferred reporting items for systematic  
4  
5 reviews and meta-analyses: the PRISMA statement. *Ann Intern Med*.  
6  
7 2009;151(4):264-269.  
8  
9
- 10 12. Meinema JG, Buwalda N, van Etten-Jamaludin FS, Visser MRM, van Dijk N.  
11  
12 Intervention Descriptions in Medical Education: What Can Be Improved? A  
13  
14 Systematic Review and Checklist. *Acad Med*. 2019;94(2):281-290.  
15  
16
- 17 13. Yardley S, Dornan T. Kirkpatrick's levels and education 'evidence'. *Med Educ*.  
18  
19 2012;46(1):97-106.  
20  
21
- 22 14. Abualenain JT, Al-Alawi MM. Simulation-based training in Ebola Personal Protective  
23  
24 Equipment for healthcare workers: Experience from King Abdulaziz University  
25  
26 Hospital in Saudi Arabia. *J Infect Public Heal*. 2018;11(6):796-800.  
27  
28
- 29 15. Andonian J, Kazi S, Therkorn J, et al. Effect of an Intervention Package and Teamwork  
30  
31 Training to Prevent Healthcare Personnel Self-contamination During Personal  
32  
33 Protective Equipment Doffing. *Clin Infect Dis*. 2019;69(Supplement\_3):S248-S255.  
34  
35
- 36 16. Bazeyo W, Bagonza J, Halage A, et al. Ebola a reality of modern Public Health; need for  
37  
38 Surveillance, Preparedness and Response Training for Health Workers and other  
39  
40 multidisciplinary teams: a case for Uganda. *Pan Afr Med J*. 2015;20:404-404.  
41  
42
- 43 17. Bemah P, Baller A, Cooper C, et al. Strengthening healthcare workforce capacity during  
44  
45 and post Ebola outbreaks in Liberia: an innovative and effective approach to epidemic  
46  
47 preparedness and response. *Pan Afr Med J*. 2019;33(Suppl 2):9-9.  
48  
49
- 50 18. Bredmose PP, Sollid S. From in-situ simulation to SOP development. *Acta Anaesthesiol*  
51  
52 *Scand*. 2015;59:26-26.  
53  
54
- 55 19. Bustamante ND, O'Keefe D, Bradley D, Pozner CN. Targeted interprofessional  
56  
57 simulation-based training for safe patient management of Ebola virus disease. *Acad*  
58  
59 *Emerg Med*. 2015;22(5):S328-S328.  
60

- 1  
2  
3 20. Carlos C, Capistrano R, Tobora CF, et al. Hospital preparedness for Ebola virus disease: a  
4 training course in the Philippines. *WPSAR*. 2015;6(1):33-43.  
5  
6  
7  
8 21. Carvalho E, Castro P, Leon E, et al. Multi-professional simulation and risk perception of  
9 health care workers caring for Ebola-infected patients. *Nurs Crit Care*.  
10 2019;24(5):256-262.  
11  
12  
13  
14 22. Casalino E, Astocondor E, Sanchez JC, Diaz-Santana DE, Del Aguila C, Carrillo JP.  
15 Personal protective equipment for the Ebola virus disease: A comparison of 2 training  
16 programs. *Am J Infect Control*. 2015;43(12):1281-1287.  
17  
18  
19  
20 23. Dube D, Addy TM, Teixeira MR, Iadarola LM. Enhancing Student Learning on  
21 Emerging Infectious Diseases: An Ebola Exemplar. *Am Biol Teach*. 2018;80:493-500.  
22  
23  
24 24. Eardley W, Bowley D, Hunt P, Round J, Tarmey N, Williams A. Education and Ebola:  
25 initiating the cascade of emergency healthcare training. *JRAMC*. 2016;162(3):203-  
26 206.  
27  
28  
29  
30 25. Eckes EJ, Gutierrez D, Peterson A, Hubbard M, Barrett K, Matlock AM. Educating  
31 Health Care Providers in Treatment of Patients With Ebola Virus Disease. *Crit care*  
32 *nurse*. 2016;36(5):e8-e13.  
33  
34  
35  
36 26. Ferranti EP, Wands L, Yeager KA, et al. Implementation of an educational program for  
37 nursing students amidst the Ebola virus disease epidemic. *Nurs Outlook*.  
38 2016;64(6):597-603.  
39  
40  
41  
42 27. Jones-Konneh TEC, Murakami A, Sasaki H, Egawa S. Intensive Education of Health  
43 Care Workers Improves the Outcome of Ebola Virus Disease: Lessons Learned from  
44 the 2014 Outbreak in Sierra Leone. *Tohoku J of Exp Med*. 2017;243(2):101-105.  
45  
46  
47  
48 28. Klomp RW, Jones L, Watanabe E, Thompson WW. CDC's Multiple Approaches to  
49 Safeguard the Health, Safety, and Resilience of Ebola Responders. *Prehosp Disaster*  
50 *Med*. 2020;35(1):69-75.  
51  
52  
53  
54  
55  
56  
57  
58  
59  
60

- 1  
2  
3 29. Mc Kenna P, Babughirana G, Amponsah M, et al. Mobile training and support (MOTS)  
4 service-using technology to increase Ebola preparedness of remotely-located  
5  
6  
7  
8  
9  
10  
11 30. MenkinSmith L, Lehman-Huskamp K, Schaefer J, et al. A Pilot Trial of Online  
12  
13  
14  
15  
16  
17  
18  
19  
20  
21  
22  
23  
24  
25  
26  
27  
28  
29  
30  
31  
32  
33  
34  
35  
36  
37  
38  
39  
40  
41  
42  
43  
44  
45  
46  
47  
48  
49  
50  
51  
52  
53  
54  
55  
56  
57  
58  
59  
60
29. Mc Kenna P, Babughirana G, Amponsah M, et al. Mobile training and support (MOTS) service-using technology to increase Ebola preparedness of remotely-located community health workers (CHWs) in Sierra Leone. *Mhealth*. 2019;5:35-35.
30. MenkinSmith L, Lehman-Huskamp K, Schaefer J, et al. A Pilot Trial of Online Simulation Training for Ebola Response Education. *Health Secur*. 2018.
31. Narra R, Sobel J, Piper C, et al. CDC safety training course for ebola virus disease healthcare workers. *Emerg Infect Dis*. 2017;23:S217-S224.
32. O'Keeffe DA, Bradley D, Evans L, et al. Ebola Emergency Preparedness: Simulation Training for Frontline Health Care Professionals. *MedEdPORTAL : the journal of teaching and learning resources*. 2016;12:10433-10433.
33. Otu A, Ebenso B, Okuzu O, Osifo-Dawodu E. Using a mHealth tutorial application to change knowledge and attitude of frontline health workers to Ebola virus disease in Nigeria: a before-and-after study. *Hum Resour Health*. 2016;14:5-5.
34. Phrampus PE, O'Donnell JM, Farkas D, et al. Rapid Development and Deployment of Ebola Readiness Training Across an Academic Health System: The Critical Role of Simulation Education, Consulting, and Systems Integration. *Simul Healthc*. 2016;11(2):82-88.
35. Rehman H, Ghani M, Rehman M. Effectiveness of basic training session regarding the awareness of Ebola virus disease among nurses of public tertiary care hospitals of Lahore. *J Pak Med Assoc*. 2020;70:477-481.
36. Sijbrandij M, Horn R, Esliker R, et al. The Effect of Psychological First Aid Training on Knowledge and Understanding about Psychosocial Support Principles: A Cluster-Randomized Controlled Trial. *Int J Environ Res Public Health*. 2020;17(2).



- 1  
2  
3 37. Soeters HM, Koivogui L, de Beer L, et al. Infection prevention and control training and  
4  
5 capacity building during the Ebola epidemic in Guinea. *PloS one*.  
6  
7 2018;13(2):e0193291-e0193291.  
8  
9  
10 38. Abrahamson SD, Canzian S, Brunet F. Using simulation for training and to change  
11  
12 protocol during the outbreak of severe acute respiratory syndrome. *Crit Care*.  
13  
14 2006;10(1):R3-R3.  
15  
16  
17 39. Carrico RM, Coty MB, Goss LK, LaJoie AS. Changing health care worker behavior in  
18  
19 relation to respiratory disease transmission with a novel training approach that uses  
20  
21 biosimulation. *Am J Infect Control*. 2007;35:14-19.  
22  
23  
24 40. Chen P-T, Huang Y-C, Cheng H-W, et al. New simulation-based airway management  
25  
26 training program for junior physicians: Advanced Airway Life Support. *Med teach*.  
27  
28 2009;31(8):e338-344.  
29  
30  
31 41. Lin C-F, Yang C-Y, Lu M-S, Kao C-C. Effectiveness of a nosocomial infection control  
32  
33 training in improving knowledge in patient-hired attendants and outsourced workers  
34  
35 in Taiwan. *JNR*. 2008;16(3):187-194.  
36  
37  
38 42. Marshall CS, Yamada S, Inada MK. Using problem-based learning for pandemic  
39  
40 preparedness. *Kaohsiung J Med Sci*. 2008;24(3 Suppl):S39-45.  
41  
42  
43 43. McInnes K, Safian L. Keeping SARS out: an education program for SARS screeners in  
44  
45 one Ontario hospital. *JNSD*. 2005;21(2):73-78.  
46  
47  
48 44. Rogers B, Buckheit K, Ostendorf J. Development of Competencies for Respiratory  
49  
50 Protection for Health Care Workers. *Workplace Health Saf*. 2019;67(2):56-67.  
51  
52  
53 45. Wu C-J, Gardner G, Chang AM. Nursing students' knowledge and practice of infection  
54  
55 control precautions: an educational intervention. *J Adv Nurs*. 2009;65(10):2142-2149.  
56  
57  
58  
59  
60

- 1  
2  
3 46. Adini B, Goldberg A, Cohen R, Bar-Dayyan Y. Impact of pandemic flu training on ability  
4  
5 of medical personnel to recognize an index case of avian influenza. *Eur J Public*  
6  
7 *Health*. 2012;22(2):169-173.  
8  
9
- 10 47. Brazzi L, Lissoni A, Panigada M, et al. Simulation-based training of extracorporeal  
11  
12 membrane oxygenation during H1N1 influenza pandemic: the Italian experience.  
13  
14 *Simul Healthc*. 2012;7(1):32-34.  
15  
16
- 17 48. Diaz JV, Lister P, Ortiz JR, Adhikari NK, Adhikari N. Development of a severe influenza  
18  
19 critical care curriculum and training materials for resource-limited settings. *Crit Care*.  
20  
21 2013;17:S184-S185.  
22  
23
- 24 49. Diaz JV, Ortiz JR, Lister P, Shindo N, Adhikari NKJ. Development of a short course on  
25  
26 management of critically ill patients with acute respiratory infection and impact on  
27  
28 clinician knowledge in resource-limited intensive care units. *Influenza Other Resp*.  
29  
30 2018;12(5):649-655.  
31  
32
- 33 50. Kim G-W, Koh Y, Lim C-M, et al. The effect of an improvement of experience and  
34  
35 training in extracorporeal membrane oxygenation management on clinical outcomes.  
36  
37 *Korean J Intern Med*. 2018;33(1):121-129.  
38  
39
- 40 51. Maunder RG, Lancee WJ, Mae R, et al. Computer-assisted resilience training to prepare  
41  
42 healthcare workers for pandemic influenza: a randomized trial of the optimal dose of  
43  
44 training. *BMC Health Serv Res*. 2010;10:72-72.  
45  
46
- 47 52. Watson CM, Duval-Arnould JM, McCrory MC, et al. Simulated pediatric resuscitation  
48  
49 use for personal protective equipment adherence measurement and training during the  
50  
51 2009 influenza (H1N1) pandemic. *Jt Comm J Qual Saf*. 2011;37(11):515-523.  
52  
53
- 54 53. Elcin M, Onan A, Odabasi O, et al. Developing a Simulation-Based Training Program for  
55  
56 the Prehospital Professionals and Students on the Management of Middle East  
57  
58 Respiratory Syndrome. *Simul Healthc*. 2016;11(6):394-403.  
59  
60

- 1  
2  
3 54. Hanley ME, Bogdan GM. Mechanical ventilation in mass casualty scenarios. Augmenting  
4  
5 staff: Project XTREME. *Respir Care*. 2008;53:176-188.  
6  
7  
8 55. Mathias C. A Learner-led, Discussion-based Elective on Emerging Infectious Disease.  
9  
10 *Am J Pharm Educ*. 2015;79.  
11  
12 56. Aiello A, Khayeri MY-E, Raja S, et al. Resilience training for hospital workers in  
13  
14 anticipation of an influenza pandemic. *J Contin Educ Health Prof*. 2011;31(1):15-20.  
15  
16  
17 57. Choi GYS, Wan WTP, Chan AKM, Tong SK, Poon ST, Joynt GM. Preparedness for  
18  
19 COVID-19: in situ simulation to enhance infection control systems in the intensive  
20  
21 care unit. *Br J Anaesth*. 2020.  
22  
23  
24 58. Christensen L, Rasmussen CS, Benfield T, Franc JM. A Randomized Trial of Instructor-  
25  
26 Led Training Versus Video Lesson in Training Health Care Providers in Proper  
27  
28 Donning and Doffing of Personal Protective Equipment. *Disaster Med Public Health*  
29  
30 *Prep*. 2020:1-15.  
31  
32  
33 59. Zhou T, Huang S, Cheng J, Xiao Y. The Distance Teaching Practice of Combined Mode  
34  
35 of Massive Open Online Course Micro-Video for Interns in Emergency Department  
36  
37 During the COVID-19 Epidemic Period. *Telemed J E Health*. 2020.  
38  
39  
40 60. Centers for Disease Control and Prevention (CDC). Training for Healthcare Professionals.  
41  
42 <https://www.cdc.gov/coronavirus/2019-ncov/hcp/training.html>. Accessed: 20 April 2020  
43  
44  
45 61. Elflein J. Fatality rate of major virus outbreaks in the last 50 years as of 2020;  
46  
47 [https://www.statista.com/statistics/1095129/worldwide-fatality-rate-of-major-virus-](https://www.statista.com/statistics/1095129/worldwide-fatality-rate-of-major-virus-outbreaks-in-the-last-50-years/)  
48  
49 [outbreaks-in-the-last-50-years/](https://www.statista.com/statistics/1095129/worldwide-fatality-rate-of-major-virus-outbreaks-in-the-last-50-years/). Accessed 1 May 2020.  
50  
51  
52 62. World Health Organization (WHO). Coronavirus disease (COVID-19) outbreak: rights,  
53  
54 roles and responsibilities of health workers, including key considerations for occupational  
55  
56 safety and health. [https://www.who.int/publications-detail/coronavirus-disease-\(covid-19\)-](https://www.who.int/publications-detail/coronavirus-disease-(covid-19)-)  
57  
58  
59  
60

1  
2  
3 [outbreak-rights-roles-and-responsibilities-of-health-workers-including-key-considerations-](#)  
4 [for-occupational-safety-and-health](#). Accessed 24 April 2020

5  
6  
7  
8 63. Cook DA, Levinson AJ, Garside S, Dupras DM, Erwin PJ, Montori VM. Internet-based  
9 learning in the health professions: a meta-analysis. *Jama*. 2008;300(10):1181-1196.

10  
11  
12 64. World Health Organization (WHO). Online training as a weapon to fight the new  
13 coronavirus. [https://www.who.int/news-room/detail/07-02-2020-online-training-as-a-](https://www.who.int/news-room/detail/07-02-2020-online-training-as-a-weapon-to-fight-the-new-coronavirus)  
14 [weapon-to-fight-the-new-coronavirus](https://www.who.int/news-room/detail/07-02-2020-online-training-as-a-weapon-to-fight-the-new-coronavirus). Accessed 01 May 2020

15  
16  
17  
18 65. McGaghie WC, Issenberg SB, Cohen ER, Barsuk JH, Wayne DB. Does simulation-based  
19 medical education with deliberate practice yield better results than traditional clinical  
20 education? A meta-analytic comparative review of the evidence. *Acad Med*.  
21 2011;86(6):706-711.

22  
23  
24  
25 66. Motola I, Devine LA, Chung HS, Sullivan JE, Issenberg SB. Simulation in healthcare  
26 education: a best evidence practical guide. AMEE Guide No. 82. *Med Teach*.  
27 2013;35(10):e1511-1530.

28  
29  
30  
31 67. Thomas PA, Kern DE, Hughes MT, Chen BY. *Curriculum development for medical*  
32 *education: a six-step approach*. JHU Press; 2016.

33  
34  
35  
36 68. Bjerrum F, Thomsen ASS, Nayahangan LJ, Konge L. Surgical simulation: Current  
37 practices and future perspectives for technical skills training. *Med Teach*.  
38 2018;40(7):668-675.

39  
40  
41  
42 69. Loignon C, Nouvet E, Couturier F, et al. Barriers to supportive care during the Ebola  
43 virus disease outbreak in West Africa: Results of a qualitative study. *PloS one*.  
44 2018;13(9).

45  
46  
47  
48 70. Norman G. Data dredging, salami-slicing, and other successful strategies to ensure  
49 rejection: twelve tips on how to not get your paper published. *Adv health sci educ*.  
50 2014;19(1):1-5.

- 1  
2  
3 71. Yudkowsky R, Park YS, Downing SM. *Assessment in health professions education*.  
4  
5 Routledge; 2019.  
6  
7  
8 72. Lockyer J, Carraccio C, Chan M-K, et al. Core principles of assessment in competency-  
9  
10 based medical education. *Med teach*. 2017;39(6):609-616.  
11  
12 73. Alken AP, Fluit C, Luursema J-M, van Goor H. Integrating technical and nontechnical  
13  
14 skills in hands-on surgical training. *Medical and Surgical Education: Past, Present*  
15  
16 *and Future*. 2018:1.  
17  
18 74. Ericsson KA, Krampe RT, Tesch-Römer C. The role of deliberate practice in the  
19  
20 acquisition of expert performance. *Psychological review*. 1993;100(3):363.  
21  
22 75. Bordage G, Harris I. Making a difference in curriculum reform and decision-making  
23  
24 processes. *Med Educ*. 2011;45(1):87-94.  
25  
26  
27 76. Van Der Vleuten PMC, Dolmans DHJM, Scherpbier AJJA.. The need for evidence in  
28  
29 education. *Med Teach*. 2000;22(3):246-250.  
30  
31  
32  
33  
34  
35  
36  
37  
38  
39  
40  
41  
42  
43  
44  
45  
46  
47  
48  
49  
50  
51  
52  
53  
54  
55  
56  
57  
58  
59  
60

## TABLE AND FIGURE LEGENDS

**Figure 1.** Preferred Reporting Items for Systematic Reviews and Meta-Analyses (PRISMA)

flowchart of the study search and selection process for a systematic review on training and education of healthcare workers during viral epidemics

**Table 1:** Inclusion and exclusion criteria for inclusion in a systematic review on training and education of healthcare workers during viral epidemics

**Table 2:** Search strings used in a systematic review on training and education of healthcare workers during viral epidemics

**Table 3:** Characteristics of the educational interventional studies included in a systematic review on training and education of healthcare workers during viral epidemics

**Supplementary files:**

**Table S1:** Overview of the educational interventional studies included in a systematic review on training and education of healthcare workers during viral epidemics including general descriptive information

**Figure 1.** Preferred Reporting Items for Systematic Reviews and Meta-Analyses (PRISMA)<sup>11</sup> flowchart of the study search and selection process for a systematic review on training and education of healthcare workers during viral epidemics

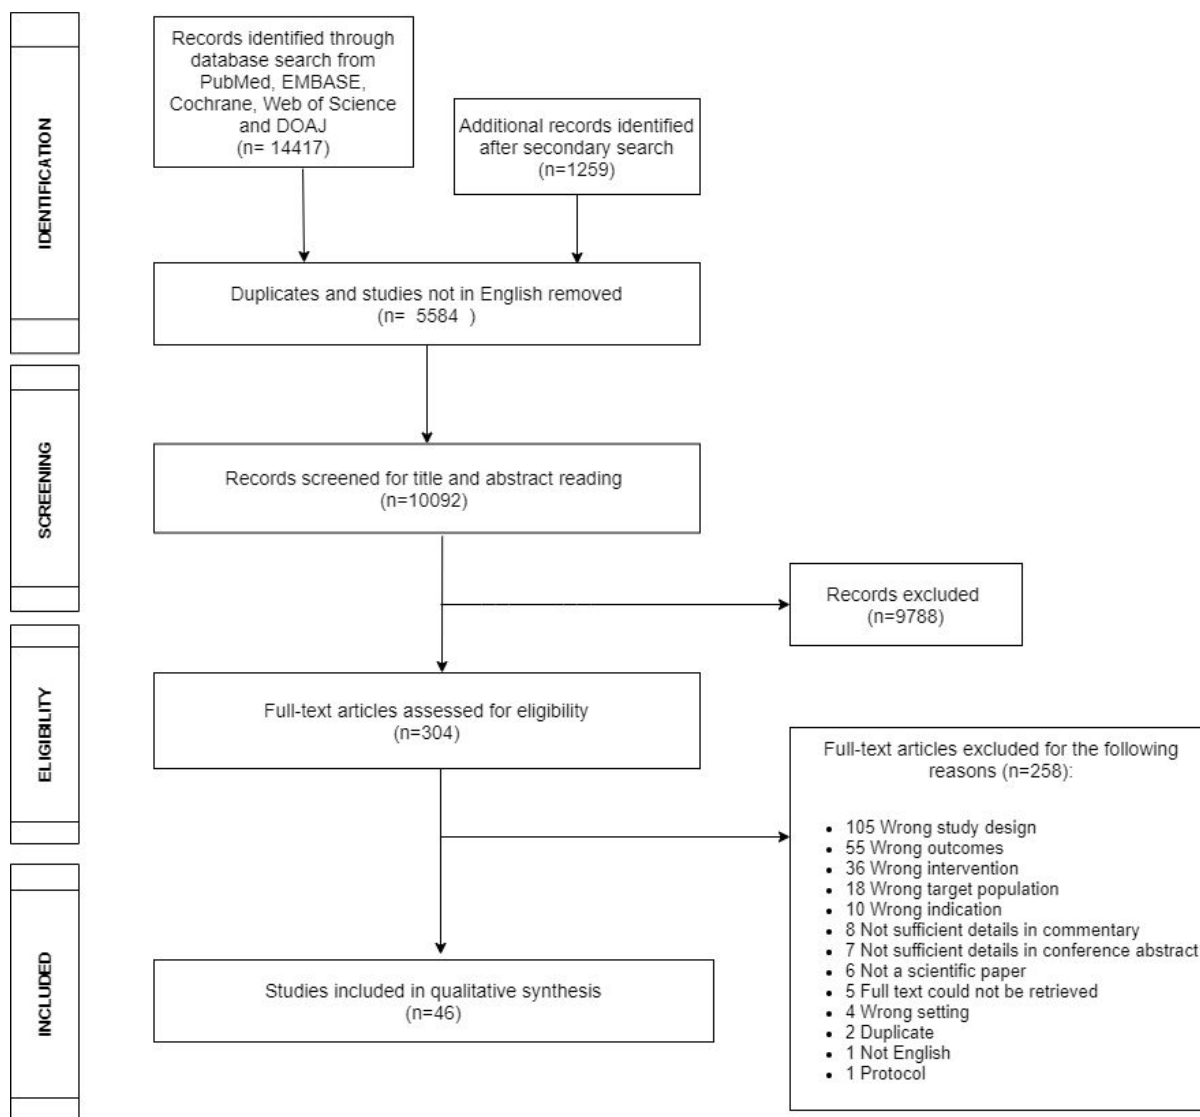

**Table 1.** Inclusion and exclusion criteria for inclusion in a systematic review on training and education of healthcare workers during viral epidemics

| <i>Inclusion criteria</i>                                                                                                                                                                                                                                                                                                                                                                                                                                                                                                                                                                                                                        | <i>Exclusion criteria</i>                                                                                                                                                                                                                                                                                                                                                                                                                                                       |
|--------------------------------------------------------------------------------------------------------------------------------------------------------------------------------------------------------------------------------------------------------------------------------------------------------------------------------------------------------------------------------------------------------------------------------------------------------------------------------------------------------------------------------------------------------------------------------------------------------------------------------------------------|---------------------------------------------------------------------------------------------------------------------------------------------------------------------------------------------------------------------------------------------------------------------------------------------------------------------------------------------------------------------------------------------------------------------------------------------------------------------------------|
| <ul style="list-style-type: none"> <li>• Population: Healthcare professionals, healthcare workers and healthcare students at any level.</li> <li>• Intervention: Studies reporting on the development, evaluation and implementation of educational interventions regarding treatment and prevention control.</li> <li>• Comparison: Any studies investigating educational interventions.</li> <li>• Outcomes: Studies with learner outcome measures.</li> <li>• Design: Any quantitative or qualitative interventional study.</li> <li>• Context: Studies conducted in any healthcare or healthcare professions educational setting.</li> </ul> | <ul style="list-style-type: none"> <li>• Studies that were not in English language.</li> <li>• Unpublished literature or not available through online access.</li> <li>• Abstracts with insufficient description, quantitative or qualitative data</li> <li>• Descriptive papers that only describe development of the educational intervention without any evaluation.</li> <li>• Studies reporting on general or “system” outcome of the educational intervention.</li> </ul> |



**Table 2:** Search strings used in a systematic review on training and education of healthcare workers during viral epidemics

| <p><b>1. PubMed</b></p>   | <p>(training OR educat* OR teach*) AND (coronavirus OR SARS OR H1N1 OR MERS OR EBOLA OR COVID-19)</p>                                                                                                                                                                                                                                                                                                                                                                                                                                                                                                                                                                                                                                                                                                                                                                                                                                                                                                                                                                                                                                                                                                                                                                                                                                                                                                                             |    |        |    |          |    |         |    |        |    |             |    |      |    |      |    |      |    |       |    |          |     |                |     |                                  |     |             |
|---------------------------|-----------------------------------------------------------------------------------------------------------------------------------------------------------------------------------------------------------------------------------------------------------------------------------------------------------------------------------------------------------------------------------------------------------------------------------------------------------------------------------------------------------------------------------------------------------------------------------------------------------------------------------------------------------------------------------------------------------------------------------------------------------------------------------------------------------------------------------------------------------------------------------------------------------------------------------------------------------------------------------------------------------------------------------------------------------------------------------------------------------------------------------------------------------------------------------------------------------------------------------------------------------------------------------------------------------------------------------------------------------------------------------------------------------------------------------|----|--------|----|----------|----|---------|----|--------|----|-------------|----|------|----|------|----|------|----|-------|----|----------|-----|----------------|-----|----------------------------------|-----|-------------|
| <p><b>1. Cochrane</b></p> | <table border="1"> <thead> <tr> <th data-bbox="676 775 719 801">ID</th> <th data-bbox="794 775 890 801">Search</th> </tr> </thead> <tbody> <tr> <td data-bbox="676 831 715 857">#1</td> <td data-bbox="794 831 948 857">TRAINING</td> </tr> <tr> <td data-bbox="676 887 715 913">#2</td> <td data-bbox="794 887 895 913">educat*</td> </tr> <tr> <td data-bbox="676 943 715 969">#3</td> <td data-bbox="794 943 879 969">teach*</td> </tr> <tr> <td data-bbox="676 999 715 1025">#4</td> <td data-bbox="794 999 948 1025">coronavirus</td> </tr> <tr> <td data-bbox="676 1055 715 1081">#5</td> <td data-bbox="794 1055 874 1081">SARS</td> </tr> <tr> <td data-bbox="676 1111 715 1137">#6</td> <td data-bbox="794 1111 874 1137">H1N1</td> </tr> <tr> <td data-bbox="676 1167 715 1193">#7</td> <td data-bbox="794 1167 879 1193">MERS</td> </tr> <tr> <td data-bbox="676 1223 715 1249">#8</td> <td data-bbox="794 1223 900 1249">EBOLA</td> </tr> <tr> <td data-bbox="676 1279 715 1305">#9</td> <td data-bbox="794 1279 943 1305">COVID-19</td> </tr> <tr> <td data-bbox="676 1335 730 1361">#10</td> <td data-bbox="794 1335 1011 1361">#1 OR #2 OR #3</td> </tr> <tr> <td data-bbox="676 1391 730 1417">#11</td> <td data-bbox="794 1391 1273 1417">#4 OR #5 OR #6 OR #7 or #8 OR #9</td> </tr> <tr> <td data-bbox="676 1447 730 1473">#12</td> <td data-bbox="794 1447 975 1473">#10 AND #11</td> </tr> </tbody> </table> | ID | Search | #1 | TRAINING | #2 | educat* | #3 | teach* | #4 | coronavirus | #5 | SARS | #6 | H1N1 | #7 | MERS | #8 | EBOLA | #9 | COVID-19 | #10 | #1 OR #2 OR #3 | #11 | #4 OR #5 OR #6 OR #7 or #8 OR #9 | #12 | #10 AND #11 |
| ID                        | Search                                                                                                                                                                                                                                                                                                                                                                                                                                                                                                                                                                                                                                                                                                                                                                                                                                                                                                                                                                                                                                                                                                                                                                                                                                                                                                                                                                                                                            |    |        |    |          |    |         |    |        |    |             |    |      |    |      |    |      |    |       |    |          |     |                |     |                                  |     |             |
| #1                        | TRAINING                                                                                                                                                                                                                                                                                                                                                                                                                                                                                                                                                                                                                                                                                                                                                                                                                                                                                                                                                                                                                                                                                                                                                                                                                                                                                                                                                                                                                          |    |        |    |          |    |         |    |        |    |             |    |      |    |      |    |      |    |       |    |          |     |                |     |                                  |     |             |
| #2                        | educat*                                                                                                                                                                                                                                                                                                                                                                                                                                                                                                                                                                                                                                                                                                                                                                                                                                                                                                                                                                                                                                                                                                                                                                                                                                                                                                                                                                                                                           |    |        |    |          |    |         |    |        |    |             |    |      |    |      |    |      |    |       |    |          |     |                |     |                                  |     |             |
| #3                        | teach*                                                                                                                                                                                                                                                                                                                                                                                                                                                                                                                                                                                                                                                                                                                                                                                                                                                                                                                                                                                                                                                                                                                                                                                                                                                                                                                                                                                                                            |    |        |    |          |    |         |    |        |    |             |    |      |    |      |    |      |    |       |    |          |     |                |     |                                  |     |             |
| #4                        | coronavirus                                                                                                                                                                                                                                                                                                                                                                                                                                                                                                                                                                                                                                                                                                                                                                                                                                                                                                                                                                                                                                                                                                                                                                                                                                                                                                                                                                                                                       |    |        |    |          |    |         |    |        |    |             |    |      |    |      |    |      |    |       |    |          |     |                |     |                                  |     |             |
| #5                        | SARS                                                                                                                                                                                                                                                                                                                                                                                                                                                                                                                                                                                                                                                                                                                                                                                                                                                                                                                                                                                                                                                                                                                                                                                                                                                                                                                                                                                                                              |    |        |    |          |    |         |    |        |    |             |    |      |    |      |    |      |    |       |    |          |     |                |     |                                  |     |             |
| #6                        | H1N1                                                                                                                                                                                                                                                                                                                                                                                                                                                                                                                                                                                                                                                                                                                                                                                                                                                                                                                                                                                                                                                                                                                                                                                                                                                                                                                                                                                                                              |    |        |    |          |    |         |    |        |    |             |    |      |    |      |    |      |    |       |    |          |     |                |     |                                  |     |             |
| #7                        | MERS                                                                                                                                                                                                                                                                                                                                                                                                                                                                                                                                                                                                                                                                                                                                                                                                                                                                                                                                                                                                                                                                                                                                                                                                                                                                                                                                                                                                                              |    |        |    |          |    |         |    |        |    |             |    |      |    |      |    |      |    |       |    |          |     |                |     |                                  |     |             |
| #8                        | EBOLA                                                                                                                                                                                                                                                                                                                                                                                                                                                                                                                                                                                                                                                                                                                                                                                                                                                                                                                                                                                                                                                                                                                                                                                                                                                                                                                                                                                                                             |    |        |    |          |    |         |    |        |    |             |    |      |    |      |    |      |    |       |    |          |     |                |     |                                  |     |             |
| #9                        | COVID-19                                                                                                                                                                                                                                                                                                                                                                                                                                                                                                                                                                                                                                                                                                                                                                                                                                                                                                                                                                                                                                                                                                                                                                                                                                                                                                                                                                                                                          |    |        |    |          |    |         |    |        |    |             |    |      |    |      |    |      |    |       |    |          |     |                |     |                                  |     |             |
| #10                       | #1 OR #2 OR #3                                                                                                                                                                                                                                                                                                                                                                                                                                                                                                                                                                                                                                                                                                                                                                                                                                                                                                                                                                                                                                                                                                                                                                                                                                                                                                                                                                                                                    |    |        |    |          |    |         |    |        |    |             |    |      |    |      |    |      |    |       |    |          |     |                |     |                                  |     |             |
| #11                       | #4 OR #5 OR #6 OR #7 or #8 OR #9                                                                                                                                                                                                                                                                                                                                                                                                                                                                                                                                                                                                                                                                                                                                                                                                                                                                                                                                                                                                                                                                                                                                                                                                                                                                                                                                                                                                  |    |        |    |          |    |         |    |        |    |             |    |      |    |      |    |      |    |       |    |          |     |                |     |                                  |     |             |
| #12                       | #10 AND #11                                                                                                                                                                                                                                                                                                                                                                                                                                                                                                                                                                                                                                                                                                                                                                                                                                                                                                                                                                                                                                                                                                                                                                                                                                                                                                                                                                                                                       |    |        |    |          |    |         |    |        |    |             |    |      |    |      |    |      |    |       |    |          |     |                |     |                                  |     |             |
| <p><b>2. EMBASE</b></p>   | <p>(training OR educat* OR teach*) AND (coronavirus OR sars OR h1n1 OR mers OR ebola OR 'covid 19') AND [2000-2020]/py AND [english]/lim</p>                                                                                                                                                                                                                                                                                                                                                                                                                                                                                                                                                                                                                                                                                                                                                                                                                                                                                                                                                                                                                                                                                                                                                                                                                                                                                      |    |        |    |          |    |         |    |        |    |             |    |      |    |      |    |      |    |       |    |          |     |                |     |                                  |     |             |

|                                 |                                                                                                                                                                                                                                                                                                                                                                                                                                                   |
|---------------------------------|---------------------------------------------------------------------------------------------------------------------------------------------------------------------------------------------------------------------------------------------------------------------------------------------------------------------------------------------------------------------------------------------------------------------------------------------------|
| <p><b>3. Web of Science</b></p> | <p>(training OR educat* OR teach*) AND (coronavirus OR SARS OR H1N1 OR MERS OR EBOLA OR COVID-19)</p>                                                                                                                                                                                                                                                                                                                                             |
|                                 |                                                                                                                                                                                                                                                                                                                                                                                                                                                   |
| <p><b>4. DOAJ</b></p>           | <p>Training AND coronavirus<br/> Training AND SARS<br/> Training AND H1N1<br/> Training AND MERS<br/> Training AND COVID-19<br/> Training AND Ebola<br/> Educat* AND coronavirus<br/> Educat* AND SARS<br/> Educat* AND H1N1<br/> Educat* AND MERS<br/> Educat* AND EBOLA<br/> Educat* AND COVID-19<br/> Teach* AND coronavirus<br/> Teach* AND SARS<br/> Teach* AND H1N1<br/> Teach* AND MERS<br/> Teach* AND EBOLA<br/> Teach* AND COVID-19</p> |

**Abbreviations:** SARS- severe acute respiratory syndrome; H1N1- H1N1 influenza virus infection; MERS- Middle East respiratory syndrome; EVD- Ebola virus disease; COVID-19- corona virus disease 2019; EMBASE- Excerpta Medica; DOAJ- Directory of Open Access Journals

**Table 3.** Characteristics of the educational interventional studies included in a systematic review on training and education of healthcare workers during viral epidemics

| <b>Viral Illness</b>                                               | <b>N<sub>studies</sub></b> | <b>N<sub>studies</sub>(%)</b> |
|--------------------------------------------------------------------|----------------------------|-------------------------------|
| SARS                                                               | 8                          | 17                            |
| H1N1                                                               | 7                          | 15                            |
| MERS                                                               | 1                          | 2                             |
| EVD                                                                | 24                         | 52                            |
| COVID-19                                                           | 3                          | 7                             |
| Multiple illnesses                                                 | 3                          | 7                             |
| <b>Years</b>                                                       |                            |                               |
| 2000–2005                                                          | 1                          | 2                             |
| 2006–2010                                                          | 8                          | 17                            |
| 2011–2015                                                          | 12                         | 26                            |
| 2016–2020                                                          | 25                         | 54                            |
| <b>Competency category</b>                                         |                            |                               |
| Knowledge                                                          | 35                         | 76                            |
| Technical skills                                                   | 26                         | 57                            |
| “Non-technical” skills                                             | 8                          | 17                            |
| <b>Primary educational modality</b>                                |                            |                               |
| Traditional didactics                                              | 13                         | 28                            |
| Simulation-based training                                          | 31                         | 67                            |
| E-learning                                                         | 6                          | 13                            |
| <b>Educational outcome (cf. Kirkpatrick's levels<sup>13</sup>)</b> |                            |                               |
| Level 1                                                            | 8                          | 17                            |
| Level 2a                                                           | 5                          | 11                            |
| Level 2b                                                           | 29                         | 63                            |
| Level 3                                                            | 1                          | 2                             |

|          |   |   |
|----------|---|---|
| Level 4a | 1 | 2 |
| Level 4b | 2 | 4 |

**Abbreviations:** SARS- severe acute respiratory syndrome; H1N1- H1N1 influenza virus infection; MERS- Middle East respiratory syndrome; EVD- Ebola virus disease; COVID-19- corona virus disease 2019

For peer review only

Supplementary table

Table S1. Overview of the educational interventional studies included in a systematic review on training and education of healthcare workers during viral epidemics including general descriptive information

| First author, year of publication | Country of first author | Viral illness | Participants                                                | Competency category and overall educational content                                                     | Delivery                                                  |                                                | Educational Intervention Checklist <sup>s</sup> |                                 |                                | Kirkpatrick's Levels | Main findings                                                                                                                                                                                                                                                                                                                                                                                                                       |
|-----------------------------------|-------------------------|---------------|-------------------------------------------------------------|---------------------------------------------------------------------------------------------------------|-----------------------------------------------------------|------------------------------------------------|-------------------------------------------------|---------------------------------|--------------------------------|----------------------|-------------------------------------------------------------------------------------------------------------------------------------------------------------------------------------------------------------------------------------------------------------------------------------------------------------------------------------------------------------------------------------------------------------------------------------|
|                                   |                         |               |                                                             |                                                                                                         | Main educational modality                                 | Duration of training                           | Preparation (items 1–2), mean                   | Intervention (items 3–15), mean | Evaluation (items 16–17), mean |                      |                                                                                                                                                                                                                                                                                                                                                                                                                                     |
| Abrahamson, 2006                  | Canada                  | SARS          | Doctors, nurses                                             | Knowledge and technical skills on advanced cardiac life support protocol for SARS patients              | Simulation-based training (scenario-based)                | 2-hour session                                 | 2.0                                             | 1.3                             | 1.5                            | 1                    | Participants rated the comprehensiveness, duration, and effectiveness of teaching methods favorably.                                                                                                                                                                                                                                                                                                                                |
| Abualenain, 2018                  | Saudi Arabia            | EVD           | Doctors, nurses, paramedics, anesthesia technicians, others | Technical skills: donning and doffing of PPE                                                            | Simulation-based training                                 | Not specified                                  | 1.5                                             | 1.3                             | 0.5                            | 2b                   | Pre- and post-training test written scores for the participants improved significantly (p <0.01) from 67% (range 57–75%) to 85% (range 81–91%), respectively. All 179 HCW completed the Ebola PPE checklist, about half compromised (different levels of compromising) the PPE protocol at some point.                                                                                                                              |
| Adini, 2012                       | Israel                  | H1N1          | Doctors, nurses                                             | Knowledge and technical skills related to avian flu (management of patient; donning and doffing of PPE) | Lectures; small group discussions and tabletop exercises  | Not specified                                  | 1.5                                             | 0.5                             | 0.5                            | 2b                   | The overall mean score for the 14-item multiple choice questions for emergency department medical personnel was 75.6. The correlation between the level of knowledge related to pandemic flu and the performance in the avian flu exercise was not significant (Spearman's rho < 0.25)                                                                                                                                              |
| Aiello, 2011                      | Canada                  | SARS, H1N1    | Doctors, nurses, other hospital staff                       | "Non-technical" skill: resilience                                                                       | Lectures                                                  | Multiple 1-hour sessions over a 5-month period | 1.5                                             | 1.1                             | 2.0                            | 1                    | A high proportion of participants found the session relevant to work life and personal life, useful, helpful, and informative. Ten themes emerged from the comments: family-work balance, antiviral prophylaxis, need for information, education and preparedness, ethical concerns, visibility of leadership, valuing frontline staff, mistrust/fears, information relating to redeployment, need for ongoing resilience training. |
| Andonian, 2019                    | USA                     | EVD           | HCW (not specified)                                         | Technical skill: donning and doffing of PPE; "Non-technical" skills: teamwork, cognitive load           | Lectures; video demonstrations, simulation-based training | 2-hour session                                 | 1.5                                             | 1.0                             | 0.5                            | 2b                   | Any type of self-contamination was high in both groups (84.6–100 %) during doffing, but the intervention group contaminated fewer sites (p = 0.002). Intervention group demonstrated more teamwork behaviors (median 27.1) compared to controls (median 9.1). Participants in the intervention group perceived marginally higher mental demand than the controls (p = 0.055).                                                       |

|    |                         |             |      |                                                                                                                             |                                                                                   |                                                                                                             |                |     |     |     |    |                                                                                                                                                                                                                                                                                                                                                                                                                                                                                                                                                                 |
|----|-------------------------|-------------|------|-----------------------------------------------------------------------------------------------------------------------------|-----------------------------------------------------------------------------------|-------------------------------------------------------------------------------------------------------------|----------------|-----|-----|-----|----|-----------------------------------------------------------------------------------------------------------------------------------------------------------------------------------------------------------------------------------------------------------------------------------------------------------------------------------------------------------------------------------------------------------------------------------------------------------------------------------------------------------------------------------------------------------------|
| 1  | <b>Bazeyo, 2015</b>     | Uganda      | EVD  | Doctors, nurses and other district HCW including lab technicians, immigration officers and security officers, media persons | Knowledge related to EVD                                                          | Small group work and discussions; demonstrations, visual aids, role play, case studies; practical exercises | 5-day course   | 1.0 | 0.6 | 0.5 | 2b | Knowledge increased from ~56–78 % pre-intervention to ~68–88 % post-intervention on a knowledge test.                                                                                                                                                                                                                                                                                                                                                                                                                                                           |
| 2  |                         |             |      |                                                                                                                             |                                                                                   |                                                                                                             |                |     |     |     |    |                                                                                                                                                                                                                                                                                                                                                                                                                                                                                                                                                                 |
| 3  |                         |             |      |                                                                                                                             |                                                                                   |                                                                                                             |                |     |     |     |    |                                                                                                                                                                                                                                                                                                                                                                                                                                                                                                                                                                 |
| 4  |                         |             |      |                                                                                                                             |                                                                                   |                                                                                                             |                |     |     |     |    |                                                                                                                                                                                                                                                                                                                                                                                                                                                                                                                                                                 |
| 5  |                         |             |      |                                                                                                                             |                                                                                   |                                                                                                             |                |     |     |     |    |                                                                                                                                                                                                                                                                                                                                                                                                                                                                                                                                                                 |
| 6  |                         |             |      |                                                                                                                             |                                                                                   |                                                                                                             |                |     |     |     |    |                                                                                                                                                                                                                                                                                                                                                                                                                                                                                                                                                                 |
| 7  |                         |             |      |                                                                                                                             |                                                                                   |                                                                                                             |                |     |     |     |    |                                                                                                                                                                                                                                                                                                                                                                                                                                                                                                                                                                 |
| 8  |                         |             |      |                                                                                                                             |                                                                                   |                                                                                                             |                |     |     |     |    |                                                                                                                                                                                                                                                                                                                                                                                                                                                                                                                                                                 |
| 9  |                         |             |      |                                                                                                                             |                                                                                   |                                                                                                             |                |     |     |     |    |                                                                                                                                                                                                                                                                                                                                                                                                                                                                                                                                                                 |
| 10 | <b>Bemah, 2019</b>      | Liberia     | EVD  | HCW (not specified)                                                                                                         | Knowledge related to PPC, EVD and IPC                                             | Classroom-based teaching; simulated patients; clinical mentoring                                            | 8-day course   | 1.0 | 1.1 | 0.5 | 4b | Both clinicians (n = 188) and non-clinicians (n = 149) showed statistically significant improvements in knowledge on clinical care and IPC concepts as measured by the 9-item pre- and post-training questionnaires (both p < 0.001). HCW infection rate was 9% by October 2014 (pre-course) and had dropped to 1% by January 2015 (post-course). Furthermore, after the conclusion of training in March 2015, no infections reported among HCW exposed to the confirmed cases despite the resurgence of Ebola cases in June and November 2015, and April 2016. |
| 11 |                         |             |      |                                                                                                                             |                                                                                   |                                                                                                             |                |     |     |     |    |                                                                                                                                                                                                                                                                                                                                                                                                                                                                                                                                                                 |
| 12 |                         |             |      |                                                                                                                             |                                                                                   |                                                                                                             |                |     |     |     |    |                                                                                                                                                                                                                                                                                                                                                                                                                                                                                                                                                                 |
| 13 |                         |             |      |                                                                                                                             |                                                                                   |                                                                                                             |                |     |     |     |    |                                                                                                                                                                                                                                                                                                                                                                                                                                                                                                                                                                 |
| 14 |                         |             |      |                                                                                                                             |                                                                                   |                                                                                                             |                |     |     |     |    |                                                                                                                                                                                                                                                                                                                                                                                                                                                                                                                                                                 |
| 15 |                         |             |      |                                                                                                                             |                                                                                   |                                                                                                             |                |     |     |     |    |                                                                                                                                                                                                                                                                                                                                                                                                                                                                                                                                                                 |
| 16 |                         |             |      |                                                                                                                             |                                                                                   |                                                                                                             |                |     |     |     |    |                                                                                                                                                                                                                                                                                                                                                                                                                                                                                                                                                                 |
| 17 |                         |             |      |                                                                                                                             |                                                                                   |                                                                                                             |                |     |     |     |    |                                                                                                                                                                                                                                                                                                                                                                                                                                                                                                                                                                 |
| 18 |                         |             |      |                                                                                                                             |                                                                                   |                                                                                                             |                |     |     |     |    |                                                                                                                                                                                                                                                                                                                                                                                                                                                                                                                                                                 |
| 19 |                         |             |      |                                                                                                                             |                                                                                   |                                                                                                             |                |     |     |     |    |                                                                                                                                                                                                                                                                                                                                                                                                                                                                                                                                                                 |
| 20 | <b>Brazzi, 2012</b>     | Italy       | H1N1 | Anesthesiologists                                                                                                           | Knowledge: gas exchange during extracorporeal bypass; Technical skill: ECMO       | Lectures; simulation-based training                                                                         | 3-day course   | 1.0 | 1.6 | 2.0 | 1  | Participants rated the relevance, quality and efficacy of the training favorably.                                                                                                                                                                                                                                                                                                                                                                                                                                                                               |
| 21 |                         |             |      |                                                                                                                             |                                                                                   |                                                                                                             |                |     |     |     |    |                                                                                                                                                                                                                                                                                                                                                                                                                                                                                                                                                                 |
| 22 |                         |             |      |                                                                                                                             |                                                                                   |                                                                                                             |                |     |     |     |    |                                                                                                                                                                                                                                                                                                                                                                                                                                                                                                                                                                 |
| 23 |                         |             |      |                                                                                                                             |                                                                                   |                                                                                                             |                |     |     |     |    |                                                                                                                                                                                                                                                                                                                                                                                                                                                                                                                                                                 |
| 24 |                         |             |      |                                                                                                                             |                                                                                   |                                                                                                             |                |     |     |     |    |                                                                                                                                                                                                                                                                                                                                                                                                                                                                                                                                                                 |
| 25 | <b>Bredmose, 2014</b>   | Norway      | EVD  | Helicopter Emergency Medical Service (HEMS) crew                                                                            | Technical skill: Helicopter Emergency Medical Service in relation to EVD patients | Simulation-based training (in-situ simulation)                                                              | Not specified  | 0.5 | 0.7 | 1.0 | 1  | All participants reported high degrees of satisfaction and realism.                                                                                                                                                                                                                                                                                                                                                                                                                                                                                             |
| 26 |                         |             |      |                                                                                                                             |                                                                                   |                                                                                                             |                |     |     |     |    |                                                                                                                                                                                                                                                                                                                                                                                                                                                                                                                                                                 |
| 27 |                         |             |      |                                                                                                                             |                                                                                   |                                                                                                             |                |     |     |     |    |                                                                                                                                                                                                                                                                                                                                                                                                                                                                                                                                                                 |
| 28 |                         |             |      |                                                                                                                             |                                                                                   |                                                                                                             |                |     |     |     |    |                                                                                                                                                                                                                                                                                                                                                                                                                                                                                                                                                                 |
| 29 |                         |             |      |                                                                                                                             |                                                                                   |                                                                                                             |                |     |     |     |    |                                                                                                                                                                                                                                                                                                                                                                                                                                                                                                                                                                 |
| 30 | <b>Bustamente, 2015</b> | USA         | EVD  | Doctors, respiratory therapists                                                                                             | Technical skill: PPE                                                              | Simulation-based training                                                                                   | 4 hours        | 0.5 | 0.8 | 1.0 | 2a | The intervention increased the confidence of participants. 95% and 87% of participants, respectively, rated the program and faculty as good or outstanding on a five-point Likert scale.                                                                                                                                                                                                                                                                                                                                                                        |
| 31 |                         |             |      |                                                                                                                             |                                                                                   |                                                                                                             |                |     |     |     |    |                                                                                                                                                                                                                                                                                                                                                                                                                                                                                                                                                                 |
| 32 |                         |             |      |                                                                                                                             |                                                                                   |                                                                                                             |                |     |     |     |    |                                                                                                                                                                                                                                                                                                                                                                                                                                                                                                                                                                 |
| 33 |                         |             |      |                                                                                                                             |                                                                                   |                                                                                                             |                |     |     |     |    |                                                                                                                                                                                                                                                                                                                                                                                                                                                                                                                                                                 |
| 34 |                         |             |      |                                                                                                                             |                                                                                   |                                                                                                             |                |     |     |     |    |                                                                                                                                                                                                                                                                                                                                                                                                                                                                                                                                                                 |
| 35 | <b>Carlos, 2015</b>     | Philippines | EVD  | Doctors, medical technologists                                                                                              | Knowledge related to EVD                                                          | Lecture and practical hands-on workshop                                                                     | 3-day workshop | 1.0 | 1.5 | 2.0 | 2b | The percentage of participants who correctly answered all 10 questions was 2.8% (8 of 285) and 22.5% (82 to 364) pre- and post the workshop, respectively. The number of questions correctly answered by participants increased from a pre-workshop median of 7 (IQR 6–8; range 3–10) to a post-workshop median of 9 (IQR 8–9; range 4–10) (p < 0.009).                                                                                                                                                                                                         |
| 36 |                         |             |      |                                                                                                                             |                                                                                   |                                                                                                             |                |     |     |     |    |                                                                                                                                                                                                                                                                                                                                                                                                                                                                                                                                                                 |
| 37 |                         |             |      |                                                                                                                             |                                                                                   |                                                                                                             |                |     |     |     |    |                                                                                                                                                                                                                                                                                                                                                                                                                                                                                                                                                                 |
| 38 |                         |             |      |                                                                                                                             |                                                                                   |                                                                                                             |                |     |     |     |    |                                                                                                                                                                                                                                                                                                                                                                                                                                                                                                                                                                 |
| 39 |                         |             |      |                                                                                                                             |                                                                                   |                                                                                                             |                |     |     |     |    |                                                                                                                                                                                                                                                                                                                                                                                                                                                                                                                                                                 |
| 40 |                         |             |      |                                                                                                                             |                                                                                   |                                                                                                             |                |     |     |     |    |                                                                                                                                                                                                                                                                                                                                                                                                                                                                                                                                                                 |
| 41 |                         |             |      |                                                                                                                             |                                                                                   |                                                                                                             |                |     |     |     |    |                                                                                                                                                                                                                                                                                                                                                                                                                                                                                                                                                                 |
| 42 |                         |             |      |                                                                                                                             |                                                                                   |                                                                                                             |                |     |     |     |    |                                                                                                                                                                                                                                                                                                                                                                                                                                                                                                                                                                 |
| 43 |                         |             |      |                                                                                                                             |                                                                                   |                                                                                                             |                |     |     |     |    |                                                                                                                                                                                                                                                                                                                                                                                                                                                                                                                                                                 |
| 44 |                         |             |      |                                                                                                                             |                                                                                   |                                                                                                             |                |     |     |     |    |                                                                                                                                                                                                                                                                                                                                                                                                                                                                                                                                                                 |
| 45 |                         |             |      |                                                                                                                             |                                                                                   |                                                                                                             |                |     |     |     |    |                                                                                                                                                                                                                                                                                                                                                                                                                                                                                                                                                                 |
| 46 |                         |             |      |                                                                                                                             |                                                                                   |                                                                                                             |                |     |     |     |    |                                                                                                                                                                                                                                                                                                                                                                                                                                                                                                                                                                 |

|                                                                  |                       |          |           |                                                                                                |                                                                                                                                                                                                                                                                                   |                                                                        |                                                                                             |     |      |     |    |                                                                                                                                                                                                                                                                                                                                                                                    |
|------------------------------------------------------------------|-----------------------|----------|-----------|------------------------------------------------------------------------------------------------|-----------------------------------------------------------------------------------------------------------------------------------------------------------------------------------------------------------------------------------------------------------------------------------|------------------------------------------------------------------------|---------------------------------------------------------------------------------------------|-----|------|-----|----|------------------------------------------------------------------------------------------------------------------------------------------------------------------------------------------------------------------------------------------------------------------------------------------------------------------------------------------------------------------------------------|
| 1<br>2<br>3<br>4<br>5                                            | <b>Carrico, 2007</b>  | USA      | SARS      | Nurses                                                                                         | Knowledge of respiratory pathogen transmission as well as standard precautions; Technical skill: donning and doffing of PPE                                                                                                                                                       | Classroom training and simulation-based training                       | Not specified, but <1 day                                                                   | 1.0 | 1.6  | 1.0 | 3  | Pre- and post-training test scores were similar for the two groups and increased from 0.64 to 0.76. Participants who received the visual training demonstrated use of PPE more often (74% vs 53%, respectively).                                                                                                                                                                   |
| 6<br>7<br>8<br>9<br>10<br>11<br>12<br>13<br>14<br>15<br>16<br>17 | <b>Carvalho, 2019</b> | Spain    | EVD       | Doctors, nurses, cleaning personnel, nursing assistants, security personnel, stretcher bearers | Knowledge: principles of care and management of infected patient. Technical skill: donning and doffing of PPE, other procedures such as blood extraction, catheter placement, endotracheal intubation, hygiene, stool and vomit, cleaning, emergency situations, patient transfer | Classes and seminars; simulation-based training (full scale scenarios) | 80-h course over 10 days                                                                    | 1.0 | 1.4  | 1.5 | 2a | Participants felt that the course increased their sense of security, predisposition to take care of these patients and confidence in management.                                                                                                                                                                                                                                   |
| 18<br>19<br>20<br>21<br>22<br>23<br>24                           | <b>Casalino, 2015</b> | France   | EVD       | Medical and nursing students                                                                   | Knowledge related to EVD; Technical skill: donning and doffing of PPE                                                                                                                                                                                                             | Classroom lecture; specific skills training                            | 1--hour theoretical session; and a practical session repeated every 72 hours for each group | 1.0 | 1.3  | 1.0 | 2b | In all 4 groups, the frequency and number of total errors and critical errors decreased significantly over the course of the training sessions ( $p < .01$ ). The intervention was associated with a greater reduction in the number of total errors and critical errors ( $p < .0001$ ). The B-PPE intervention groups had the fewest errors and critical errors ( $p < .0001$ ). |
| 25<br>26<br>27<br>28<br>29                                       | <b>Chen, 2009</b>     | Taiwan   | SARS      | Doctors                                                                                        | Technical skills: Advanced Airway Life Support                                                                                                                                                                                                                                    | Lecture; simulation-based training                                     | 2-hour lecture, 4-hour hands-on workshop                                                    | 1.5 | 1.8  | 1.5 | 2b | Residents received higher scores during re-simulation regardless of scoring methods.                                                                                                                                                                                                                                                                                               |
| 30<br>31<br>32<br>33<br>34<br>35                                 | <b>Choi, 2020</b>     | Hongkong | COVI D-19 | Doctors and nurses                                                                             | Technical skills: donning and doffing of PPE, intubation, central venous catheter                                                                                                                                                                                                 | Simulation-based training                                              | 20-30 min simulation and 30-mins debriefing                                                 | 1.0 | 1.08 | 1.0 | 2a | The domains for feedback and discussion included the following key events in chronological order: donning PPE, pre-intubation check, intubation procedure, and doffing PPE. Local guideline changes.                                                                                                                                                                               |

|                                                       |                          |             |           |                                                         |                                                                                        |                                                 |                                                                                                                         |     |      |     |    |                                                                                                                                                                                                                                                                                                                                                                                                                                                                                                                                                                                                            |
|-------------------------------------------------------|--------------------------|-------------|-----------|---------------------------------------------------------|----------------------------------------------------------------------------------------|-------------------------------------------------|-------------------------------------------------------------------------------------------------------------------------|-----|------|-----|----|------------------------------------------------------------------------------------------------------------------------------------------------------------------------------------------------------------------------------------------------------------------------------------------------------------------------------------------------------------------------------------------------------------------------------------------------------------------------------------------------------------------------------------------------------------------------------------------------------------|
| 1<br>2<br>3<br>4<br>5<br>6<br>7<br>8<br>9<br>10<br>11 | <b>Christensen, 2020</b> | Denmark     | COVI D-19 | Medical students                                        | Technical skills: donning and doffing of PPE                                           | Demonstration/return demonstration; video-based | 2- to 3-hour training session for control group; intervention group watched videos as many times as they wished at home | 1.0 | 1.25 | 0.5 | 2b | 19 of 21 participants returned for 1-month post-instruction evaluation. In donning, the scores in the instructor group ranged from 67% to 100%, and the scores in the video group ranged from 62% to 100%. The overall mean donning score was 86.5/100; the mean score was 84.8 for the instructor group and 88.0 for the video group. In doffing, the scores in the instructor group ranged from 59% to 96%, and the scores in the video group ranged from 51% to 93%. The overall mean doffing score was 76.4/100; the mean score for the instructor group was 79.1, and it was 73.9 for the video group |
| 12<br>13<br>14<br>15<br>16                            | <b>Diaz, 2013</b>        | USA         | H1N1      | Doctors                                                 | Knowledge related to H1N1                                                              | Lecture, interactive group sessions, role play  | 3-day course                                                                                                            | 1.0 | 1.3  | 2.0 | 2b | Critical care knowledge improved significantly from before the training to immediately after (Caribbean site: 58–80%; Indonesia site: 56–75%; p <0.001 for both).                                                                                                                                                                                                                                                                                                                                                                                                                                          |
| 17<br>18<br>19<br>20<br>21                            | <b>Diaz, 2018</b>        | Switzerland | H1N1      | Undergraduate students in nursing and health sciences   | Knowledge: Critical care management/(best ICU practices, ARDS, and pregnancy influenza | Lectures; case-based learning                   | 3-day course                                                                                                            | 2.0 | 1.7  | 2.0 | 2b | Test scores improved significantly after training (p < .001) both in pilot and implementation phases; participants rated the learning units as good to very good (mean, 5-point Likert scale: 4.6–4.8).                                                                                                                                                                                                                                                                                                                                                                                                    |
| 22<br>23<br>24<br>25<br>26                            | <b>Dube, 2018</b>        | USA         | EVD       | Natural and health science major undergraduate students | Knowledge related to EVD                                                               | Case-based learning                             | Integrated in undergraduate curriculum                                                                                  | 2.0 | 1.3  | 2.0 | 2b | Students improved in relation to theoretical knowledge on all 10 questions (a mix of multiple choice questions, true/false statements and free text responses). Overall score (normalized) improved from ~47%–80%.                                                                                                                                                                                                                                                                                                                                                                                         |
| 27<br>28<br>29<br>30<br>31                            | <b>Eardley, 2015</b>     | UK          | EVD       | HCW, university and military staff                      | Knowledge related to EVD                                                               | Lectures; drills                                | 4-day course                                                                                                            | 1.5 | 1.5  | 2.0 | 2b | Factual knowledge increased (a median change on the VAS of 4.0 by all delegates, p<0.001). Change in confidence in teaching increased (median change on the VAS of 5.0 for all delegates, p<0.001).                                                                                                                                                                                                                                                                                                                                                                                                        |
| 32<br>33<br>34<br>35<br>36                            | <b>Eckes, 2016</b>       | USA         | EVD       | Nurses                                                  | Knowledge: Principles of EVD care and PPE; Technical skill: donning and doffing of PPE | Lectures; simulation-based training             | Quarterly course (hours not mentioned)                                                                                  | 1.5 | 1.3  | 1.0 | 1  | Participants completed a return demonstration and written assessment. Further details not provided.                                                                                                                                                                                                                                                                                                                                                                                                                                                                                                        |
| 37<br>38<br>39<br>40<br>41<br>42                      | <b>Elcin, 2016</b>       | Turkey      | MERS      | Paramedics                                              | Knowledge related to MERS and PPE for healthcare providers                             | Simulation-based training                       | 1-day course with 3 sessions                                                                                            | 1.5 | 1.6  | 2.0 | 2b | 16 of 19 (84%) teams recognized the possibility of MERS as a measure of their awareness in the baseline evaluation. The participating sites lacked PPE, which revealed their baseline level of preparedness for MERS. Certain improvements in donning and doffing PPE were observed in the post-training evaluation.                                                                                                                                                                                                                                                                                       |



|    |                           |       |            |                                                                                                                                                                      |                                                                                                                                                                                                          |                                                    |                                                                                                                     |     |     |     |    |                                                                                                                                                                                                                                                                             |
|----|---------------------------|-------|------------|----------------------------------------------------------------------------------------------------------------------------------------------------------------------|----------------------------------------------------------------------------------------------------------------------------------------------------------------------------------------------------------|----------------------------------------------------|---------------------------------------------------------------------------------------------------------------------|-----|-----|-----|----|-----------------------------------------------------------------------------------------------------------------------------------------------------------------------------------------------------------------------------------------------------------------------------|
| 1  | <b>Ferranti, 2016</b>     | USA   | EVD        | Nurses                                                                                                                                                               | Knowledge related to EVD                                                                                                                                                                                 | E-learning: online PowerPoint slides               | 3-day course                                                                                                        | 1.5 | 1.7 | 0.5 | 2b | Knowledge increased significantly from pre- to post and retention test (75.9 % to 90.7 % and 89.8 %, respectively).                                                                                                                                                         |
| 2  |                           |       |            |                                                                                                                                                                      |                                                                                                                                                                                                          |                                                    |                                                                                                                     |     |     |     |    |                                                                                                                                                                                                                                                                             |
| 3  |                           |       |            |                                                                                                                                                                      |                                                                                                                                                                                                          |                                                    |                                                                                                                     |     |     |     |    |                                                                                                                                                                                                                                                                             |
| 4  |                           |       |            |                                                                                                                                                                      |                                                                                                                                                                                                          |                                                    |                                                                                                                     |     |     |     |    |                                                                                                                                                                                                                                                                             |
| 5  | <b>Hanley, 2008</b>       | USA   | SARS, H1N1 | Nurses, respiratory therapy students, general internists, physician assistants, nurse practitioners, non-critical-care nurses veterinarians, and physical therapists | Knowledge and technical skills: Infection control, manual ventilation, mechanical ventilation, airway maintenance, and airway suctioning.                                                                | E-learning: video (DVD); simulation-based training | Just-in-time training (90 mins)                                                                                     | 2.0 | 1.1 | 1.0 | 1  | No detailed information of results from the assessment, however, groups passed based on their cognitive scores to the questions and performance scores during the dry lab competency testing.                                                                               |
| 6  |                           |       |            |                                                                                                                                                                      |                                                                                                                                                                                                          |                                                    |                                                                                                                     |     |     |     |    |                                                                                                                                                                                                                                                                             |
| 7  |                           |       |            |                                                                                                                                                                      |                                                                                                                                                                                                          |                                                    |                                                                                                                     |     |     |     |    |                                                                                                                                                                                                                                                                             |
| 8  |                           |       |            |                                                                                                                                                                      |                                                                                                                                                                                                          |                                                    |                                                                                                                     |     |     |     |    |                                                                                                                                                                                                                                                                             |
| 9  |                           |       |            |                                                                                                                                                                      |                                                                                                                                                                                                          |                                                    |                                                                                                                     |     |     |     |    |                                                                                                                                                                                                                                                                             |
| 10 |                           |       |            |                                                                                                                                                                      |                                                                                                                                                                                                          |                                                    |                                                                                                                     |     |     |     |    |                                                                                                                                                                                                                                                                             |
| 11 |                           |       |            |                                                                                                                                                                      |                                                                                                                                                                                                          |                                                    |                                                                                                                     |     |     |     |    |                                                                                                                                                                                                                                                                             |
| 12 |                           |       |            |                                                                                                                                                                      |                                                                                                                                                                                                          |                                                    |                                                                                                                     |     |     |     |    |                                                                                                                                                                                                                                                                             |
| 13 |                           |       |            |                                                                                                                                                                      |                                                                                                                                                                                                          |                                                    |                                                                                                                     |     |     |     |    |                                                                                                                                                                                                                                                                             |
| 14 |                           |       |            |                                                                                                                                                                      |                                                                                                                                                                                                          |                                                    |                                                                                                                     |     |     |     |    |                                                                                                                                                                                                                                                                             |
| 15 |                           |       |            |                                                                                                                                                                      |                                                                                                                                                                                                          |                                                    |                                                                                                                     |     |     |     |    |                                                                                                                                                                                                                                                                             |
| 16 |                           |       |            |                                                                                                                                                                      |                                                                                                                                                                                                          |                                                    |                                                                                                                     |     |     |     |    |                                                                                                                                                                                                                                                                             |
| 17 | <b>Jones-Konneh, 2017</b> | Japan | EVD        | Nurses, other HCW (not specified)                                                                                                                                    | Knowledge related to EVD; Technical skills on PPE and other IPC skills such as hand hygiene, mixing of chlorine solutions, etc.                                                                          | Simulation-based-training                          | 3 phases of training: A. 3 days theory, 2 days for SBT; B. 1-day theory and 2 days SBT; C. 3 days for basic IPC/PPE | 2.0 | 1.3 | 1.0 | 2a | Feeling of comfort decreased anxiety during patient care; no other quantification of training outcome presented. It is speculated that HCWs had improved understanding of EVD, IPC and patient care, which subsequently could have contributed to the survival of patients. |
| 18 |                           |       |            |                                                                                                                                                                      |                                                                                                                                                                                                          |                                                    |                                                                                                                     |     |     |     |    |                                                                                                                                                                                                                                                                             |
| 19 |                           |       |            |                                                                                                                                                                      |                                                                                                                                                                                                          |                                                    |                                                                                                                     |     |     |     |    |                                                                                                                                                                                                                                                                             |
| 20 |                           |       |            |                                                                                                                                                                      |                                                                                                                                                                                                          |                                                    |                                                                                                                     |     |     |     |    |                                                                                                                                                                                                                                                                             |
| 21 |                           |       |            |                                                                                                                                                                      |                                                                                                                                                                                                          |                                                    |                                                                                                                     |     |     |     |    |                                                                                                                                                                                                                                                                             |
| 22 |                           |       |            |                                                                                                                                                                      |                                                                                                                                                                                                          |                                                    |                                                                                                                     |     |     |     |    |                                                                                                                                                                                                                                                                             |
| 23 |                           |       |            |                                                                                                                                                                      |                                                                                                                                                                                                          |                                                    |                                                                                                                     |     |     |     |    |                                                                                                                                                                                                                                                                             |
| 24 |                           |       |            |                                                                                                                                                                      |                                                                                                                                                                                                          |                                                    |                                                                                                                     |     |     |     |    |                                                                                                                                                                                                                                                                             |
| 25 |                           |       |            |                                                                                                                                                                      |                                                                                                                                                                                                          |                                                    |                                                                                                                     |     |     |     |    |                                                                                                                                                                                                                                                                             |
| 26 | <b>Kim, 2018</b>          | Korea | H1N1       | Doctors, nurses                                                                                                                                                      | Knowledge: basic hemodynamics, ECMO physiology, circuit anatomy, and hemostasis of patients on ECMO; Technical and behavioral skills to manage ECMO scenarios; "Nontechnical" skills: team communication | Lectures; simulation-based training                | Every month (duration not mentioned)                                                                                | 1.5 | 1.2 | 0.5 | 4b | Mortality rate of patients markedly lower during period 2 (after program implementation) as compared to period 1 (before implementation).                                                                                                                                   |
| 27 |                           |       |            |                                                                                                                                                                      |                                                                                                                                                                                                          |                                                    |                                                                                                                     |     |     |     |    |                                                                                                                                                                                                                                                                             |
| 28 |                           |       |            |                                                                                                                                                                      |                                                                                                                                                                                                          |                                                    |                                                                                                                     |     |     |     |    |                                                                                                                                                                                                                                                                             |
| 29 |                           |       |            |                                                                                                                                                                      |                                                                                                                                                                                                          |                                                    |                                                                                                                     |     |     |     |    |                                                                                                                                                                                                                                                                             |
| 30 |                           |       |            |                                                                                                                                                                      |                                                                                                                                                                                                          |                                                    |                                                                                                                     |     |     |     |    |                                                                                                                                                                                                                                                                             |
| 31 |                           |       |            |                                                                                                                                                                      |                                                                                                                                                                                                          |                                                    |                                                                                                                     |     |     |     |    |                                                                                                                                                                                                                                                                             |
| 32 |                           |       |            |                                                                                                                                                                      |                                                                                                                                                                                                          |                                                    |                                                                                                                     |     |     |     |    |                                                                                                                                                                                                                                                                             |
| 33 |                           |       |            |                                                                                                                                                                      |                                                                                                                                                                                                          |                                                    |                                                                                                                     |     |     |     |    |                                                                                                                                                                                                                                                                             |
| 34 |                           |       |            |                                                                                                                                                                      |                                                                                                                                                                                                          |                                                    |                                                                                                                     |     |     |     |    |                                                                                                                                                                                                                                                                             |
| 35 |                           |       |            |                                                                                                                                                                      |                                                                                                                                                                                                          |                                                    |                                                                                                                     |     |     |     |    |                                                                                                                                                                                                                                                                             |
| 36 |                           |       |            |                                                                                                                                                                      |                                                                                                                                                                                                          |                                                    |                                                                                                                     |     |     |     |    |                                                                                                                                                                                                                                                                             |
| 37 |                           |       |            |                                                                                                                                                                      |                                                                                                                                                                                                          |                                                    |                                                                                                                     |     |     |     |    |                                                                                                                                                                                                                                                                             |
| 38 |                           |       |            |                                                                                                                                                                      |                                                                                                                                                                                                          |                                                    |                                                                                                                     |     |     |     |    |                                                                                                                                                                                                                                                                             |
| 39 |                           |       |            |                                                                                                                                                                      |                                                                                                                                                                                                          |                                                    |                                                                                                                     |     |     |     |    |                                                                                                                                                                                                                                                                             |
| 40 |                           |       |            |                                                                                                                                                                      |                                                                                                                                                                                                          |                                                    |                                                                                                                     |     |     |     |    |                                                                                                                                                                                                                                                                             |
| 41 |                           |       |            |                                                                                                                                                                      |                                                                                                                                                                                                          |                                                    |                                                                                                                     |     |     |     |    |                                                                                                                                                                                                                                                                             |
| 42 |                           |       |            |                                                                                                                                                                      |                                                                                                                                                                                                          |                                                    |                                                                                                                     |     |     |     |    |                                                                                                                                                                                                                                                                             |
| 43 |                           |       |            |                                                                                                                                                                      |                                                                                                                                                                                                          |                                                    |                                                                                                                     |     |     |     |    |                                                                                                                                                                                                                                                                             |
| 44 |                           |       |            |                                                                                                                                                                      |                                                                                                                                                                                                          |                                                    |                                                                                                                     |     |     |     |    |                                                                                                                                                                                                                                                                             |
| 45 |                           |       |            |                                                                                                                                                                      |                                                                                                                                                                                                          |                                                    |                                                                                                                     |     |     |     |    |                                                                                                                                                                                                                                                                             |
| 46 |                           |       |            |                                                                                                                                                                      |                                                                                                                                                                                                          |                                                    |                                                                                                                     |     |     |     |    |                                                                                                                                                                                                                                                                             |

|                                                                                                    |                       |        |                 |                                                           |                                                                                                                                |                                                                                                   |                                                        |     |     |     |    |                                                                                                                                                                                                                                                                                                                                                                                                                                       |
|----------------------------------------------------------------------------------------------------|-----------------------|--------|-----------------|-----------------------------------------------------------|--------------------------------------------------------------------------------------------------------------------------------|---------------------------------------------------------------------------------------------------|--------------------------------------------------------|-----|-----|-----|----|---------------------------------------------------------------------------------------------------------------------------------------------------------------------------------------------------------------------------------------------------------------------------------------------------------------------------------------------------------------------------------------------------------------------------------------|
| 1<br>2<br>3<br>4<br>5<br>6<br>7<br>8                                                               | <b>Klomp, 2020</b>    | USA    | EVD             | CDC staff (non-clinical deployers)                        | "Nontechnical skills": resilience                                                                                              | Traditional didactics                                                                             | 3-day training                                         | 1.5 | 1.3 | 0.5 | 2b | Pre- to post training knowledge in relation to key elements and resilience increased 2.95 points out of 30 (95% CI, 2.53-3.37). The Self-Efficacy Survey total score showed a significant improvement in overall self-efficacy. This suggests participants gained useful knowledge of resilience principles and strategies.                                                                                                           |
| 9<br>10<br>11<br>12<br>13                                                                          | <b>Lin, 2008</b>      | Taiwan | SARS            | Patient-hired attendants and outsourced workers           | Knowledge: control of nosocomial infections                                                                                    | Lecture; video-based demonstration (CD)                                                           | 2-hour session                                         | 1.0 | 1.0 | 1.0 | 2b | Improvement from 88.5 to 91.4 points from pre to post-training on a knowledge test (p < .001).                                                                                                                                                                                                                                                                                                                                        |
| 14<br>15<br>16<br>17<br>18<br>19                                                                   | <b>Marshall, 2008</b> | USA    | SARS            | Nurses, social workers and student, public health student | Knowledge: Bioterrorism preparedness                                                                                           | Problem-based learning                                                                            | 3-hour session; follow-up session 1 week later         | 1.5 | 1.6 | 2.0 | 2b | Increase in knowledge of bioevent preparedness (pre- and post-training knowledge test: overall mean score: 2.4 to 3.8, respectively). Participants found that the case is realistic (mean = 4.1), all health perspectives addressed (mean=3.8), that they had actively participated (mean = 4.6) and gave an overall review (8.5, based on 1-10 scale).                                                                               |
| 20<br>21<br>22<br>23<br>24<br>25<br>26<br>27<br>28<br>29                                           | <b>Mathias, 2015</b>  | USA    | SARS, EVD, H1N1 | Pharmacists                                               | Knowledge related to EVD; roles pharmacists play as health care professionals; "Non-technical" skill: critical thinking skills | Learner-led discussions and presentations                                                         | 3-hour/week, offered over two consecutive years        | 2.0 | 1.8 | 2.0 | 2b | Evaluation of knowledge and critical thinking skills, as well as performance within the group: assessment based on preparedness and participation in discussions, oral presentations, research paper and final examination. Overall grades for all categories: Cohort 1 from year 1 (14 learners) = all received a final grade of A; Cohort 2 from the following year (year 2) (16 learners) = final grade A (n=10), B (n=5), C (n=1) |
| 30<br>31<br>32<br>33<br>34<br>35<br>36<br>37<br>38<br>39<br>40<br>41<br>42<br>43<br>44<br>45<br>46 | <b>Maunder, 2010</b>  | Canada | H1N1            | Nurses, other HCW (not specified)                         | "Non-technical" skill: Resilience                                                                                              | E-learning: Course materials on a flash drive for self-learning and audio and video mini lectures | 3 course lengths (short/medium/long): 7/12/17 sessions | 2.0 | 1.9 | 1.5 | 2b | Intention-to-treat analysis showed significant improvements in confidence in support and training, pandemic self-efficacy and interpersonal problems. Participants who under-utilized coping via problem-solving or seeking support or over-utilized escape-avoidance have experienced improved coping. Comparison of doses showed improved interpersonal problems in the medium and long course but not in the short course          |

|    |                           |         |      |                                                                                                                         |                                                                                                                                                                                  |                                                                                                  |                                              |     |     |     |    |                                                                                                                                                                                                                                                                                                                                                                          |
|----|---------------------------|---------|------|-------------------------------------------------------------------------------------------------------------------------|----------------------------------------------------------------------------------------------------------------------------------------------------------------------------------|--------------------------------------------------------------------------------------------------|----------------------------------------------|-----|-----|-----|----|--------------------------------------------------------------------------------------------------------------------------------------------------------------------------------------------------------------------------------------------------------------------------------------------------------------------------------------------------------------------------|
| 1  | <b>Mc Kenna, 2019</b>     | Belgium | EVD  | Community HCW                                                                                                           | Knowledge related to EVD                                                                                                                                                         | E-learning: mobile training platform                                                             | Multiple modules, each approx. 5 minutes     | 1.5 | 1.5 | 2.0 | 2b | For module II (relevant to the disease), there was an increase of 3 % in CHCWs correctly answering >80 % of the questions. For CHCWs with 50-79 % correct answers there was a regression in performance after training.                                                                                                                                                  |
| 2  |                           |         |      |                                                                                                                         |                                                                                                                                                                                  |                                                                                                  |                                              |     |     |     |    |                                                                                                                                                                                                                                                                                                                                                                          |
| 3  |                           |         |      |                                                                                                                         |                                                                                                                                                                                  |                                                                                                  |                                              |     |     |     |    |                                                                                                                                                                                                                                                                                                                                                                          |
| 4  |                           |         |      |                                                                                                                         |                                                                                                                                                                                  |                                                                                                  |                                              |     |     |     |    |                                                                                                                                                                                                                                                                                                                                                                          |
| 5  | <b>McInnes, 2005</b>      | Canada  | SARS | Security guards, volunteer students                                                                                     | Knowledge related to SARS; Technical skills: handwashing, putting on N-95; temperature taking; "Non-technical" skills: reporting, interpersonal skills, accurate decision making | Lectures; demonstrations and role playing                                                        | Education day (number of hours not detailed) | 1.5 | 1.2 | 0.5 | 1  | The training enabled the trainees to problem solve, think critically, and use the guidelines established by the screening tool to make decisions about individuals trying to enter the hospital. It also enabled them to realize the importance of their interpersonal skills through mock interactions with different people in a variety of circumstances.             |
| 6  |                           |         |      |                                                                                                                         |                                                                                                                                                                                  |                                                                                                  |                                              |     |     |     |    |                                                                                                                                                                                                                                                                                                                                                                          |
| 7  |                           |         |      |                                                                                                                         |                                                                                                                                                                                  |                                                                                                  |                                              |     |     |     |    |                                                                                                                                                                                                                                                                                                                                                                          |
| 8  |                           |         |      |                                                                                                                         |                                                                                                                                                                                  |                                                                                                  |                                              |     |     |     |    |                                                                                                                                                                                                                                                                                                                                                                          |
| 9  |                           |         |      |                                                                                                                         |                                                                                                                                                                                  |                                                                                                  |                                              |     |     |     |    |                                                                                                                                                                                                                                                                                                                                                                          |
| 10 |                           |         |      |                                                                                                                         |                                                                                                                                                                                  |                                                                                                  |                                              |     |     |     |    |                                                                                                                                                                                                                                                                                                                                                                          |
| 11 |                           |         |      |                                                                                                                         |                                                                                                                                                                                  |                                                                                                  |                                              |     |     |     |    |                                                                                                                                                                                                                                                                                                                                                                          |
| 12 |                           |         |      |                                                                                                                         |                                                                                                                                                                                  |                                                                                                  |                                              |     |     |     |    |                                                                                                                                                                                                                                                                                                                                                                          |
| 13 | <b>MenkinSmit h, 2018</b> | USA     | EVD  | Medical fellows and residents, nursing specialty training, others (students)                                            | Knowledge safety measures in Ebola patient care; Technical skills in donning and doffing of PPE, infection control practices                                                     | E-learning: information via online software; Simulation-based training (team training scenarios) | 3-day course                                 | 1.5 | 1.8 | 2.0 | 2b | Both groups demonstrated a significant increase in their knowledge test scores after completing the online curriculum, with average scores for novices increasing from 19.7 to 24.3 (n = 9, p < 0.01) and average score in experienced participants increasing from 19.2 to 22.3 (n = 9, p = 0.03). Overall high performance of both groups in the simulation scenarios. |
| 14 |                           |         |      |                                                                                                                         |                                                                                                                                                                                  |                                                                                                  |                                              |     |     |     |    |                                                                                                                                                                                                                                                                                                                                                                          |
| 15 |                           |         |      |                                                                                                                         |                                                                                                                                                                                  |                                                                                                  |                                              |     |     |     |    |                                                                                                                                                                                                                                                                                                                                                                          |
| 16 |                           |         |      |                                                                                                                         |                                                                                                                                                                                  |                                                                                                  |                                              |     |     |     |    |                                                                                                                                                                                                                                                                                                                                                                          |
| 17 |                           |         |      |                                                                                                                         |                                                                                                                                                                                  |                                                                                                  |                                              |     |     |     |    |                                                                                                                                                                                                                                                                                                                                                                          |
| 18 |                           |         |      |                                                                                                                         |                                                                                                                                                                                  |                                                                                                  |                                              |     |     |     |    |                                                                                                                                                                                                                                                                                                                                                                          |
| 19 |                           |         |      |                                                                                                                         |                                                                                                                                                                                  |                                                                                                  |                                              |     |     |     |    |                                                                                                                                                                                                                                                                                                                                                                          |
| 20 | <b>Narra, 2016</b>        | USA     | EVD  | HCW                                                                                                                     | Knowledge related to EVD, infection prevention and control; Technical skill: donning and doffing of PPE                                                                          | Lectures; small-group discussions, and practical exercises                                       | 3-day course                                 | 2.0 | 1.8 | 2.0 | 1  | This course quickly increased the number of clinicians who could provide care in West Africa ETUs, showing the feasibility of rapidly developing and implementing training in response to a public health emergency.                                                                                                                                                     |
| 21 |                           |         |      |                                                                                                                         |                                                                                                                                                                                  |                                                                                                  |                                              |     |     |     |    |                                                                                                                                                                                                                                                                                                                                                                          |
| 22 |                           |         |      |                                                                                                                         |                                                                                                                                                                                  |                                                                                                  |                                              |     |     |     |    |                                                                                                                                                                                                                                                                                                                                                                          |
| 23 |                           |         |      |                                                                                                                         |                                                                                                                                                                                  |                                                                                                  |                                              |     |     |     |    |                                                                                                                                                                                                                                                                                                                                                                          |
| 24 |                           |         |      |                                                                                                                         |                                                                                                                                                                                  |                                                                                                  |                                              |     |     |     |    |                                                                                                                                                                                                                                                                                                                                                                          |
| 25 | <b>O'Keeffe, 2016</b>     | Ireland | EVD  | Nurses, respiratory therapists, laboratory technicians, and ancillary staff                                             | Knowledge related to EVD and safety management; Technical skills: donning and doffing of PPE, airway management, dressing care and IV infusion, urinary catheter care            | Simulation-based training (interprofessional)                                                    | 4-hour program                               | 2.0 | 1.7 | 2.0 | 2b | Increased level of confidence in three key areas: Contamination breach (pre: 2.17; post: 3.71; p<.001), clinical skills in PPE (pre: 2.04; post: 3.82; p<.001), donning and doffing PPE (pre: 2.04; post: 3.88; p<.001).                                                                                                                                                 |
| 26 |                           |         |      |                                                                                                                         |                                                                                                                                                                                  |                                                                                                  |                                              |     |     |     |    |                                                                                                                                                                                                                                                                                                                                                                          |
| 27 |                           |         |      |                                                                                                                         |                                                                                                                                                                                  |                                                                                                  |                                              |     |     |     |    |                                                                                                                                                                                                                                                                                                                                                                          |
| 28 |                           |         |      |                                                                                                                         |                                                                                                                                                                                  |                                                                                                  |                                              |     |     |     |    |                                                                                                                                                                                                                                                                                                                                                                          |
| 29 |                           |         |      |                                                                                                                         |                                                                                                                                                                                  |                                                                                                  |                                              |     |     |     |    |                                                                                                                                                                                                                                                                                                                                                                          |
| 30 |                           |         |      |                                                                                                                         |                                                                                                                                                                                  |                                                                                                  |                                              |     |     |     |    |                                                                                                                                                                                                                                                                                                                                                                          |
| 31 |                           |         |      |                                                                                                                         |                                                                                                                                                                                  |                                                                                                  |                                              |     |     |     |    |                                                                                                                                                                                                                                                                                                                                                                          |
| 32 | <b>Otu, 2016</b>          | Nigeria | EVD  | Nurses, community HCW, midwives, laboratory scientists, auxiliary nurses, pharmacy technicians and health record staff. | Knowledge on EVD disease specific information; "Non-technical" skill: attitude                                                                                                   | E-learning: tablet computers with Ebola awareness tutorial (EAT)                                 | 2 weeks allowed to review training materials | 1.5 | 1.5 | 1.0 | 2b | Increased in knowledge pre- and post-intervention (61.2 to 68.2, 11% improvement < 0.05); Fear of EVD reduced significantly from 89 to 52%. Positive attitudes between pre- and post-EAT scores regarding contact with EVD patients: (83 to 92%); eating bush meat (57 to 64%) and risky burial practices (67 to 79%),                                                   |
| 33 |                           |         |      |                                                                                                                         |                                                                                                                                                                                  |                                                                                                  |                                              |     |     |     |    |                                                                                                                                                                                                                                                                                                                                                                          |
| 34 |                           |         |      |                                                                                                                         |                                                                                                                                                                                  |                                                                                                  |                                              |     |     |     |    |                                                                                                                                                                                                                                                                                                                                                                          |
| 35 |                           |         |      |                                                                                                                         |                                                                                                                                                                                  |                                                                                                  |                                              |     |     |     |    |                                                                                                                                                                                                                                                                                                                                                                          |
| 36 |                           |         |      |                                                                                                                         |                                                                                                                                                                                  |                                                                                                  |                                              |     |     |     |    |                                                                                                                                                                                                                                                                                                                                                                          |
| 37 |                           |         |      |                                                                                                                         |                                                                                                                                                                                  |                                                                                                  |                                              |     |     |     |    |                                                                                                                                                                                                                                                                                                                                                                          |
| 38 |                           |         |      |                                                                                                                         |                                                                                                                                                                                  |                                                                                                  |                                              |     |     |     |    |                                                                                                                                                                                                                                                                                                                                                                          |
| 39 |                           |         |      |                                                                                                                         |                                                                                                                                                                                  |                                                                                                  |                                              |     |     |     |    |                                                                                                                                                                                                                                                                                                                                                                          |
| 40 |                           |         |      |                                                                                                                         |                                                                                                                                                                                  |                                                                                                  |                                              |     |     |     |    |                                                                                                                                                                                                                                                                                                                                                                          |
| 41 |                           |         |      |                                                                                                                         |                                                                                                                                                                                  |                                                                                                  |                                              |     |     |     |    |                                                                                                                                                                                                                                                                                                                                                                          |
| 42 |                           |         |      |                                                                                                                         |                                                                                                                                                                                  |                                                                                                  |                                              |     |     |     |    |                                                                                                                                                                                                                                                                                                                                                                          |
| 43 |                           |         |      |                                                                                                                         |                                                                                                                                                                                  |                                                                                                  |                                              |     |     |     |    |                                                                                                                                                                                                                                                                                                                                                                          |
| 44 |                           |         |      |                                                                                                                         |                                                                                                                                                                                  |                                                                                                  |                                              |     |     |     |    |                                                                                                                                                                                                                                                                                                                                                                          |
| 45 |                           |         |      |                                                                                                                         |                                                                                                                                                                                  |                                                                                                  |                                              |     |     |     |    |                                                                                                                                                                                                                                                                                                                                                                          |
| 46 |                           |         |      |                                                                                                                         |                                                                                                                                                                                  |                                                                                                  |                                              |     |     |     |    |                                                                                                                                                                                                                                                                                                                                                                          |

|                                                                                        |                         |             |      |                                                                                                                                                                                                                         |                                                                                                                                                                                                                                                                   |                                                                             |                                                         |     |     |     |    |                                                                                                                                                                                                                                                                                                                                                                                                                                                                                                                                                                       |
|----------------------------------------------------------------------------------------|-------------------------|-------------|------|-------------------------------------------------------------------------------------------------------------------------------------------------------------------------------------------------------------------------|-------------------------------------------------------------------------------------------------------------------------------------------------------------------------------------------------------------------------------------------------------------------|-----------------------------------------------------------------------------|---------------------------------------------------------|-----|-----|-----|----|-----------------------------------------------------------------------------------------------------------------------------------------------------------------------------------------------------------------------------------------------------------------------------------------------------------------------------------------------------------------------------------------------------------------------------------------------------------------------------------------------------------------------------------------------------------------------|
| 1<br>2<br>3<br>4<br>5                                                                  | <b>Phrampus, 2016</b>   | USA         | EVD  | Doctors, nurses, other response team members                                                                                                                                                                            | Knowledge on Ebola, principles of PPE, response, equipment, personal safety, policies; Technical skills: donning and doffing of PPE;                                                                                                                              | Onsite and online pre-course modules; simulation-based training             | 4-hour sessions 4 days/week for 3 weeks                 | 2.0 | 1.8 | 2.0 | 2a | Post-course evaluation using an 18-item tool= Median score for each item ranged from 8 to 9 (on a 9-point Likert scale), with interquartile range of 7-9 in all items                                                                                                                                                                                                                                                                                                                                                                                                 |
| 6<br>7<br>8<br>9                                                                       | <b>Rehman, 2020</b>     | Pakistan    | EVD  | Nurses                                                                                                                                                                                                                  | Knowledge: EVD awareness                                                                                                                                                                                                                                          | Lectures; video demonstration and discussion                                | 3-hour session                                          | 1.0 | 0.9 | 0.5 | 2b | Pre- and post-training test scores demonstrated improvement in knowledge. The mean baseline knowledge score was 3.93±2.519 while the intervention mean score was 13.18±1.192; difference was significant (p<0.05)                                                                                                                                                                                                                                                                                                                                                     |
| 10<br>11<br>12<br>13<br>14<br>15<br>16<br>17<br>18<br>19<br>20<br>21<br>22<br>23<br>24 | <b>Rogers, 2019</b>     | USA         | SARS | Nurses, respiratory therapists, certified nursing assistants, industrial hygienists, safety and occupational health professionals, infection preventionists, and others identified with respiratory protection practice | Knowledge: Respiratory protection practice such as infectious agent transmission routes, hand hygiene, hazard assessment, respirator selection and care, medical evaluation and monitoring, fit-testing and training, respirator donning/doffing and seal checks. | Educational program (lecture) Clinical observations, focus group interviews | Educational program: 1-day training                     | 2.0 | 1.5 | 1.5 | 4a | In the educational program, 17 (68%) participants received either a higher or perfect score on the post-training test. Observations of HCW: 216 documented incident observations of individuals and worker groups that resulted in 253 actions or resolutions by the practice champions.                                                                                                                                                                                                                                                                              |
| 25<br>26<br>27<br>28<br>29<br>30<br>31<br>32<br>33<br>34                               | <b>Sijbrandij, 2020</b> | Netherlands | EVD  | Nurses, community HCW, midwives, maternal health assistant, vaccinators, lab assistant, etc                                                                                                                             | Knowledge: psychological first aid (PFA)                                                                                                                                                                                                                          | Traditional didactics                                                       | one day (no. of hours not mentioned)                    | 1.5 | 1.3 | 0.5 | 2b | Overall knowledge of appropriate psychosocial responses we found a significant effect of time, which was moderated by condition (X <sup>2</sup> (2) = 28.63; p < 0.0001). In the PFA group, knowledge about appropriate psychosocial responses increased relative to the control group. Post-hoc contrasts showed a medium to large effect size at the post-PFA assessment (mean estimated difference 1.73; d = 0.50; t(486.01) = 4.54; p < 0.001) and a medium effect size at the follow-up (mean estimated difference 1.54; d = 0.43; t(329.28) = 3.87; p = 0.001). |
| 35<br>36<br>37<br>38<br>39<br>40<br>41<br>42                                           | <b>Soeters, 2018</b>    | USA         | EVD  | Doctors, nurses, pharmacists, laboratorian, health tech, midwife, admin, students,                                                                                                                                      | Knowledge on IPC; Technical skills: donning and doffing of PPE, triage, waste management                                                                                                                                                                          | Traditional didactics; hands-on training                                    | First course: 3-days<br>Second course: condensed 2 days | 2.0 | 1.3 | 1.5 | 2b | Median test scores increased from 40% among HCW, 15% among IPC trainers, and 21% (among IPC supervisors to post-training test scores of 83%, 93%, and 93%, respectively (all p<0.0001).                                                                                                                                                                                                                                                                                                                                                                               |

|    |                     |        |                 |                                                                                                            |                                                                                                                                                                                                                                                                                                                               |                                                                                                               |                               |     |      |     |    |                                                                                                                                                                                                                                                                                                                                                                                                                                                                                                                                                                                                                                     |
|----|---------------------|--------|-----------------|------------------------------------------------------------------------------------------------------------|-------------------------------------------------------------------------------------------------------------------------------------------------------------------------------------------------------------------------------------------------------------------------------------------------------------------------------|---------------------------------------------------------------------------------------------------------------|-------------------------------|-----|------|-----|----|-------------------------------------------------------------------------------------------------------------------------------------------------------------------------------------------------------------------------------------------------------------------------------------------------------------------------------------------------------------------------------------------------------------------------------------------------------------------------------------------------------------------------------------------------------------------------------------------------------------------------------------|
|    |                     |        | cleaner, others |                                                                                                            |                                                                                                                                                                                                                                                                                                                               |                                                                                                               |                               |     |      |     |    |                                                                                                                                                                                                                                                                                                                                                                                                                                                                                                                                                                                                                                     |
| 1  |                     |        |                 |                                                                                                            |                                                                                                                                                                                                                                                                                                                               |                                                                                                               |                               |     |      |     |    |                                                                                                                                                                                                                                                                                                                                                                                                                                                                                                                                                                                                                                     |
| 2  |                     |        |                 |                                                                                                            |                                                                                                                                                                                                                                                                                                                               |                                                                                                               |                               |     |      |     |    |                                                                                                                                                                                                                                                                                                                                                                                                                                                                                                                                                                                                                                     |
| 3  |                     |        |                 |                                                                                                            |                                                                                                                                                                                                                                                                                                                               |                                                                                                               |                               |     |      |     |    |                                                                                                                                                                                                                                                                                                                                                                                                                                                                                                                                                                                                                                     |
| 4  |                     |        |                 |                                                                                                            |                                                                                                                                                                                                                                                                                                                               |                                                                                                               |                               |     |      |     |    |                                                                                                                                                                                                                                                                                                                                                                                                                                                                                                                                                                                                                                     |
| 5  |                     |        |                 |                                                                                                            |                                                                                                                                                                                                                                                                                                                               |                                                                                                               |                               |     |      |     |    |                                                                                                                                                                                                                                                                                                                                                                                                                                                                                                                                                                                                                                     |
| 6  | <b>Watson, 2011</b> | USA    | H1N1            | Doctors, nurses, respiratory therapist, support technicians, pharmacists, physician extenders and students | Technical skill: PPE adherence                                                                                                                                                                                                                                                                                                | Simulation-based training (in-situ)                                                                           | 8-week observation period     | 2.0 | 1.3  | 1.0 | 2b | Observed adherence with PPE use= 61% for eye shields, 81% for filtering facepiece respirators or powered air-purifying respirators, and 87% for gown/gloves. Use of a "gatekeeper" to control access and facilitate donning of PPE was associated with 100% adherence with gown and respirator precautions and improved respirator adherence. All simulations showed deviation from pediatric basic life support protocols. The median time to bag-valve-mask ventilation improved from 4.3 to 2.7 minutes with a gatekeeper present. Confidence in PPE use improved from 64% to 85% after the mock code and structured debriefing. |
| 7  |                     |        |                 |                                                                                                            |                                                                                                                                                                                                                                                                                                                               |                                                                                                               |                               |     |      |     |    |                                                                                                                                                                                                                                                                                                                                                                                                                                                                                                                                                                                                                                     |
| 8  |                     |        |                 |                                                                                                            |                                                                                                                                                                                                                                                                                                                               |                                                                                                               |                               |     |      |     |    |                                                                                                                                                                                                                                                                                                                                                                                                                                                                                                                                                                                                                                     |
| 9  |                     |        |                 |                                                                                                            |                                                                                                                                                                                                                                                                                                                               |                                                                                                               |                               |     |      |     |    |                                                                                                                                                                                                                                                                                                                                                                                                                                                                                                                                                                                                                                     |
| 10 |                     |        |                 |                                                                                                            |                                                                                                                                                                                                                                                                                                                               |                                                                                                               |                               |     |      |     |    |                                                                                                                                                                                                                                                                                                                                                                                                                                                                                                                                                                                                                                     |
| 11 |                     |        |                 |                                                                                                            |                                                                                                                                                                                                                                                                                                                               |                                                                                                               |                               |     |      |     |    |                                                                                                                                                                                                                                                                                                                                                                                                                                                                                                                                                                                                                                     |
| 12 |                     |        |                 |                                                                                                            |                                                                                                                                                                                                                                                                                                                               |                                                                                                               |                               |     |      |     |    |                                                                                                                                                                                                                                                                                                                                                                                                                                                                                                                                                                                                                                     |
| 13 |                     |        |                 |                                                                                                            |                                                                                                                                                                                                                                                                                                                               |                                                                                                               |                               |     |      |     |    |                                                                                                                                                                                                                                                                                                                                                                                                                                                                                                                                                                                                                                     |
| 14 |                     |        |                 |                                                                                                            |                                                                                                                                                                                                                                                                                                                               |                                                                                                               |                               |     |      |     |    |                                                                                                                                                                                                                                                                                                                                                                                                                                                                                                                                                                                                                                     |
| 15 |                     |        |                 |                                                                                                            |                                                                                                                                                                                                                                                                                                                               |                                                                                                               |                               |     |      |     |    |                                                                                                                                                                                                                                                                                                                                                                                                                                                                                                                                                                                                                                     |
| 16 | <b>Wu, 2009</b>     | Taiwan | SARS            | Nurses                                                                                                     | Knowledge on IPC                                                                                                                                                                                                                                                                                                              | Formal lectures, hands-on demonstrations, simulation scenarios, role play, brainstorming and group discussion | 1-hour/week (total 16 hours). | 1.5 | 1.3  | 0.5 | 2b | Intervention cohort improved significantly on pre- to post-training test and follow-up test (8.87, 9.85, 11.00 points, respectively) compared with the control cohort (8.87, 8.67, 8.70 points, respectively).                                                                                                                                                                                                                                                                                                                                                                                                                      |
| 17 |                     |        |                 |                                                                                                            |                                                                                                                                                                                                                                                                                                                               |                                                                                                               |                               |     |      |     |    |                                                                                                                                                                                                                                                                                                                                                                                                                                                                                                                                                                                                                                     |
| 18 |                     |        |                 |                                                                                                            |                                                                                                                                                                                                                                                                                                                               |                                                                                                               |                               |     |      |     |    |                                                                                                                                                                                                                                                                                                                                                                                                                                                                                                                                                                                                                                     |
| 19 |                     |        |                 |                                                                                                            |                                                                                                                                                                                                                                                                                                                               |                                                                                                               |                               |     |      |     |    |                                                                                                                                                                                                                                                                                                                                                                                                                                                                                                                                                                                                                                     |
| 20 |                     |        |                 |                                                                                                            |                                                                                                                                                                                                                                                                                                                               |                                                                                                               |                               |     |      |     |    |                                                                                                                                                                                                                                                                                                                                                                                                                                                                                                                                                                                                                                     |
| 21 |                     |        |                 |                                                                                                            |                                                                                                                                                                                                                                                                                                                               |                                                                                                               |                               |     |      |     |    |                                                                                                                                                                                                                                                                                                                                                                                                                                                                                                                                                                                                                                     |
| 22 |                     |        |                 |                                                                                                            |                                                                                                                                                                                                                                                                                                                               |                                                                                                               |                               |     |      |     |    |                                                                                                                                                                                                                                                                                                                                                                                                                                                                                                                                                                                                                                     |
| 23 | <b>Zhou, 2020</b>   | China  | COVI D-19       | Nurses and nursing students                                                                                | Knowledge: emergency and critical care nursing; Technical skills: CPR, use of defibrillator, use of ECG, collection of various specimens, artificial airway techniques, usage of oropharyngeal ventilation tube and mask; gastric lavage technology of gastric lavage machine; Hemostasis, bandaging, and fixation technology | Traditional didactics and simulation-based training; micro-video (webcasts)                                   | 10-hr class sessions          | 2   | 1.75 | 2   | 2b | The total scores of theoretical assessment and practical assessment were 60 and 40, respectively, with 100 points in total. For the theory and practice of group 2: no significant difference between the two groups in terms of theory and practice (p = 0.654; p = 0.813; p = 0.180 Teaching satisfaction: the interns' teaching satisfaction of group 2 was higher than that of group 1: There was overall satisfaction; significant difference between the two groups (p = 0.020, p = 0.039; p = 0.012; p = 0.029). There was no significant difference in content rationality between the two groups                           |
| 24 |                     |        |                 |                                                                                                            |                                                                                                                                                                                                                                                                                                                               |                                                                                                               |                               |     |      |     |    |                                                                                                                                                                                                                                                                                                                                                                                                                                                                                                                                                                                                                                     |
| 25 |                     |        |                 |                                                                                                            |                                                                                                                                                                                                                                                                                                                               |                                                                                                               |                               |     |      |     |    |                                                                                                                                                                                                                                                                                                                                                                                                                                                                                                                                                                                                                                     |
| 26 |                     |        |                 |                                                                                                            |                                                                                                                                                                                                                                                                                                                               |                                                                                                               |                               |     |      |     |    |                                                                                                                                                                                                                                                                                                                                                                                                                                                                                                                                                                                                                                     |
| 27 |                     |        |                 |                                                                                                            |                                                                                                                                                                                                                                                                                                                               |                                                                                                               |                               |     |      |     |    |                                                                                                                                                                                                                                                                                                                                                                                                                                                                                                                                                                                                                                     |
| 28 |                     |        |                 |                                                                                                            |                                                                                                                                                                                                                                                                                                                               |                                                                                                               |                               |     |      |     |    |                                                                                                                                                                                                                                                                                                                                                                                                                                                                                                                                                                                                                                     |
| 29 |                     |        |                 |                                                                                                            |                                                                                                                                                                                                                                                                                                                               |                                                                                                               |                               |     |      |     |    |                                                                                                                                                                                                                                                                                                                                                                                                                                                                                                                                                                                                                                     |
| 30 |                     |        |                 |                                                                                                            |                                                                                                                                                                                                                                                                                                                               |                                                                                                               |                               |     |      |     |    |                                                                                                                                                                                                                                                                                                                                                                                                                                                                                                                                                                                                                                     |
| 31 |                     |        |                 |                                                                                                            |                                                                                                                                                                                                                                                                                                                               |                                                                                                               |                               |     |      |     |    |                                                                                                                                                                                                                                                                                                                                                                                                                                                                                                                                                                                                                                     |
| 32 |                     |        |                 |                                                                                                            |                                                                                                                                                                                                                                                                                                                               |                                                                                                               |                               |     |      |     |    |                                                                                                                                                                                                                                                                                                                                                                                                                                                                                                                                                                                                                                     |
| 33 |                     |        |                 |                                                                                                            |                                                                                                                                                                                                                                                                                                                               |                                                                                                               |                               |     |      |     |    |                                                                                                                                                                                                                                                                                                                                                                                                                                                                                                                                                                                                                                     |
| 34 |                     |        |                 |                                                                                                            |                                                                                                                                                                                                                                                                                                                               |                                                                                                               |                               |     |      |     |    |                                                                                                                                                                                                                                                                                                                                                                                                                                                                                                                                                                                                                                     |
| 35 |                     |        |                 |                                                                                                            |                                                                                                                                                                                                                                                                                                                               |                                                                                                               |                               |     |      |     |    |                                                                                                                                                                                                                                                                                                                                                                                                                                                                                                                                                                                                                                     |
| 36 |                     |        |                 |                                                                                                            |                                                                                                                                                                                                                                                                                                                               |                                                                                                               |                               |     |      |     |    |                                                                                                                                                                                                                                                                                                                                                                                                                                                                                                                                                                                                                                     |
| 37 |                     |        |                 |                                                                                                            |                                                                                                                                                                                                                                                                                                                               |                                                                                                               |                               |     |      |     |    |                                                                                                                                                                                                                                                                                                                                                                                                                                                                                                                                                                                                                                     |
| 38 |                     |        |                 |                                                                                                            |                                                                                                                                                                                                                                                                                                                               |                                                                                                               |                               |     |      |     |    |                                                                                                                                                                                                                                                                                                                                                                                                                                                                                                                                                                                                                                     |
| 39 |                     |        |                 |                                                                                                            |                                                                                                                                                                                                                                                                                                                               |                                                                                                               |                               |     |      |     |    |                                                                                                                                                                                                                                                                                                                                                                                                                                                                                                                                                                                                                                     |
| 40 |                     |        |                 |                                                                                                            |                                                                                                                                                                                                                                                                                                                               |                                                                                                               |                               |     |      |     |    |                                                                                                                                                                                                                                                                                                                                                                                                                                                                                                                                                                                                                                     |
| 41 |                     |        |                 |                                                                                                            |                                                                                                                                                                                                                                                                                                                               |                                                                                                               |                               |     |      |     |    |                                                                                                                                                                                                                                                                                                                                                                                                                                                                                                                                                                                                                                     |
| 42 |                     |        |                 |                                                                                                            |                                                                                                                                                                                                                                                                                                                               |                                                                                                               |                               |     |      |     |    |                                                                                                                                                                                                                                                                                                                                                                                                                                                                                                                                                                                                                                     |
| 43 |                     |        |                 |                                                                                                            |                                                                                                                                                                                                                                                                                                                               |                                                                                                               |                               |     |      |     |    |                                                                                                                                                                                                                                                                                                                                                                                                                                                                                                                                                                                                                                     |
| 44 |                     |        |                 |                                                                                                            |                                                                                                                                                                                                                                                                                                                               |                                                                                                               |                               |     |      |     |    |                                                                                                                                                                                                                                                                                                                                                                                                                                                                                                                                                                                                                                     |
| 45 |                     |        |                 |                                                                                                            |                                                                                                                                                                                                                                                                                                                               |                                                                                                               |                               |     |      |     |    |                                                                                                                                                                                                                                                                                                                                                                                                                                                                                                                                                                                                                                     |
| 46 |                     |        |                 |                                                                                                            |                                                                                                                                                                                                                                                                                                                               |                                                                                                               |                               |     |      |     |    |                                                                                                                                                                                                                                                                                                                                                                                                                                                                                                                                                                                                                                     |

1 § **Educational intervention checklist**<sup>12</sup>. Each item is assigned a score of 0/1/2 (higher is better) based on descriptive anchors.

2 \* **Kirkpatrick levels**<sup>13</sup>: Level 1=learner's view regarding the educational experience; level 2a=modification of behaviour or attitude; level 2b=acquisition or  
3 modification of knowledge/skills; level 3=actual behavioural change documented by transfer of learning to the workplace; level 4a=changes in organisational  
4 practice that are attributable to the intervention; and level 4b= outcomes at the level of patient health and well-being

5  
6 **Abbreviations:** SARS- severe acute respiratory syndrome; H1N1- H1N1 influenza virus infection; MERS- Middle East respiratory syndrome; EVD- Ebola  
7 virus disease; COVID-19- corona virus disease 2019; HCW – healthcare workers; PPE – personal protective equipment; IPC – infection prevention and control;  
8 ECMO – extracorporeal membrane oxygenation; SBT – simulation-based training; CPR- Cardiopulmonary resuscitation; ECG- electrocardiogram  
9

10  
11  
12  
13  
14  
15  
16  
17  
18  
19  
20  
21  
22  
23  
24  
25  
26  
27  
28  
29  
30  
31  
32  
33  
34  
35  
36  
37  
38  
39  
40  
41  
42  
43  
44  
45  
46

For peer review only

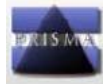

# PRISMA 2009 Checklist

1  
2  
3  
4  
5  
6  
7  
8  
9  
10  
11  
12  
13  
14  
15  
16  
17  
18  
19  
20  
21  
22  
23  
24  
25  
26  
27  
28  
29  
30  
31  
32  
33  
34  
35  
36  
37  
38  
39  
40  
41  
42  
43  
44  
45  
46  
47

| Section/topic                      | #  | Checklist item                                                                                                                                                                                                                                                                                              | Reported on page # |
|------------------------------------|----|-------------------------------------------------------------------------------------------------------------------------------------------------------------------------------------------------------------------------------------------------------------------------------------------------------------|--------------------|
| <b>TITLE</b>                       |    |                                                                                                                                                                                                                                                                                                             |                    |
| Title                              | 1  | Identify the report as a systematic review, meta-analysis, or both.                                                                                                                                                                                                                                         | 1                  |
| <b>ABSTRACT</b>                    |    |                                                                                                                                                                                                                                                                                                             |                    |
| Structured summary                 | 2  | Provide a structured summary including, as applicable: background; objectives; data sources; study eligibility criteria, participants, and interventions; study appraisal and synthesis methods; results; limitations; conclusions and implications of key findings; systematic review registration number. | 2                  |
| <b>INTRODUCTION</b>                |    |                                                                                                                                                                                                                                                                                                             |                    |
| Rationale                          | 3  | Describe the rationale for the review in the context of what is already known.                                                                                                                                                                                                                              | 4                  |
| Objectives                         | 4  | Provide an explicit statement of questions being addressed with reference to participants, interventions, comparisons, outcomes, and study design (PICOS).                                                                                                                                                  | 4-5                |
| <b>METHODS</b>                     |    |                                                                                                                                                                                                                                                                                                             |                    |
| Protocol and registration          | 5  | Indicate if a review protocol exists, if and where it can be accessed (e.g., Web address), and, if available, provide registration information including registration number.                                                                                                                               | -                  |
| Eligibility criteria               | 6  | Specify study characteristics (e.g., PICOS, length of follow-up) and report characteristics (e.g., years considered, language, publication status) used as criteria for eligibility, giving rationale.                                                                                                      | 6                  |
| Information sources                | 7  | Describe all information sources (e.g., databases with dates of coverage, contact with study authors to identify additional studies) in the search and date last searched.                                                                                                                                  | 6                  |
| Search                             | 8  | Present full electronic search strategy for at least one database, including any limits used, such that it could be repeated.                                                                                                                                                                               | 6                  |
| Study selection                    | 9  | State the process for selecting studies (i.e., screening, eligibility, included in systematic review, and, if applicable, included in the meta-analysis).                                                                                                                                                   | 6                  |
| Data collection process            | 10 | Describe method of data extraction from reports (e.g., piloted forms, independently, in duplicate) and any processes for obtaining and confirming data from investigators.                                                                                                                                  | 7                  |
| Data items                         | 11 | List and define all variables for which data were sought (e.g., PICOS, funding sources) and any assumptions and simplifications made.                                                                                                                                                                       | 7                  |
| Risk of bias in individual studies | 12 | Describe methods used for assessing risk of bias of individual studies (including specification of whether this was done at the study or outcome level), and how this information is to be used in any data synthesis.                                                                                      | 6                  |
| Summary measures                   | 13 | State the principal summary measures (e.g., risk ratio, difference in means).                                                                                                                                                                                                                               | -                  |
| Synthesis of results               | 14 | Describe the methods of handling data and combining results of studies, if done, including measures of consistency (e.g., I <sup>2</sup> ) for each meta-analysis.                                                                                                                                          | 7                  |

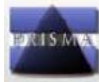

# PRISMA 2009 Checklist

Page 1 of 2

| Section/topic                 | #  | Checklist item                                                                                                                                                                                           | Reported on page # |
|-------------------------------|----|----------------------------------------------------------------------------------------------------------------------------------------------------------------------------------------------------------|--------------------|
| Risk of bias across studies   | 15 | Specify any assessment of risk of bias that may affect the cumulative evidence (e.g., publication bias, selective reporting within studies).                                                             | -                  |
| Additional analyses           | 16 | Describe methods of additional analyses (e.g., sensitivity or subgroup analyses, meta-regression), if done, indicating which were pre-specified.                                                         | -                  |
| <b>RESULTS</b>                |    |                                                                                                                                                                                                          |                    |
| Study selection               | 17 | Give numbers of studies screened, assessed for eligibility, and included in the review, with reasons for exclusions at each stage, ideally with a flow diagram.                                          | 8                  |
| Study characteristics         | 18 | For each study, present characteristics for which data were extracted (e.g., study size, PICOS, follow-up period) and provide the citations.                                                             | 8                  |
| Risk of bias within studies   | 19 | Present data on risk of bias of each study and, if available, any outcome level assessment (see item 12).                                                                                                | -                  |
| Results of individual studies | 20 | For all outcomes considered (benefits or harms), present, for each study: (a) simple summary data for each intervention group (b) effect estimates and confidence intervals, ideally with a forest plot. | 8-11               |
| Synthesis of results          | 21 | Present results of each meta-analysis done, including confidence intervals and measures of consistency.                                                                                                  | 8-11               |
| Risk of bias across studies   | 22 | Present results of any assessment of risk of bias across studies (see Item 15).                                                                                                                          | -                  |
| Additional analysis           | 23 | Give results of additional analyses, if done (e.g., sensitivity or subgroup analyses, meta-regression [see Item 16]).                                                                                    | -                  |
| <b>DISCUSSION</b>             |    |                                                                                                                                                                                                          |                    |
| Summary of evidence           | 24 | Summarize the main findings including the strength of evidence for each main outcome; consider their relevance to key groups (e.g., healthcare providers, users, and policy makers).                     | 12-16              |
| Limitations                   | 25 | Discuss limitations at study and outcome level (e.g., risk of bias), and at review-level (e.g., incomplete retrieval of identified research, reporting bias).                                            | 16                 |
| Conclusions                   | 26 | Provide a general interpretation of the results in the context of other evidence, and implications for future research.                                                                                  | 16                 |
| <b>FUNDING</b>                |    |                                                                                                                                                                                                          |                    |
| Funding                       | 27 | Describe sources of funding for the systematic review and other support (e.g., supply of data); role of funders for the systematic review.                                                               | 17                 |

From: Moher D, Liberati A, Tetzlaff J, Altman DG, The PRISMA Group (2009). Preferred Reporting Items for Systematic Reviews and Meta-Analyses: The PRISMA Statement. PLoS Med 6(7): e1000097. doi:10.1371/journal.pmed1000097

For more information, visit: [www.prisma-statement.org](http://www.prisma-statement.org).

Page 2 of 2

For peer review only - <http://bmjopen.bmj.com/site/about/guidelines.xhtml>



# BMJ Open

## Training and education of healthcare workers during viral epidemics: A systematic review

|                                 |                                                                                                                                                                                                                                                                                                                                                                                                                                                                                                                                                                                                                                                                                                                                                                                                                                                                                                                   |
|---------------------------------|-------------------------------------------------------------------------------------------------------------------------------------------------------------------------------------------------------------------------------------------------------------------------------------------------------------------------------------------------------------------------------------------------------------------------------------------------------------------------------------------------------------------------------------------------------------------------------------------------------------------------------------------------------------------------------------------------------------------------------------------------------------------------------------------------------------------------------------------------------------------------------------------------------------------|
| Journal:                        | <i>BMJ Open</i>                                                                                                                                                                                                                                                                                                                                                                                                                                                                                                                                                                                                                                                                                                                                                                                                                                                                                                   |
| Manuscript ID                   | bmjopen-2020-044111.R1                                                                                                                                                                                                                                                                                                                                                                                                                                                                                                                                                                                                                                                                                                                                                                                                                                                                                            |
| Article Type:                   | Original research                                                                                                                                                                                                                                                                                                                                                                                                                                                                                                                                                                                                                                                                                                                                                                                                                                                                                                 |
| Date Submitted by the Author:   | 04-Jan-2021                                                                                                                                                                                                                                                                                                                                                                                                                                                                                                                                                                                                                                                                                                                                                                                                                                                                                                       |
| Complete List of Authors:       | Nayahangan, Leizl Joy; Region Hovedstaden, Copenhagen Academy for Medical Education and Simulation (CAMES), Centre for HR and Education and the Capital Region of Denmark<br>Konge, Lars; Region Hovedstaden, Copenhagen Academy for Medical Education and Simulation (CAMES), Centre for HR and Education and the Capital Region of Denmark; University of Copenhagen Faculty of Health and Medical Sciences, Department of Clinical Medicine<br>Russell, Lene ; Rigshospitalet, Department of Intensive Care; Region Hovedstaden, Copenhagen Academy for Medical Education and Simulation (CAMES), Centre for HR and Education and the Capital Region of Denmark<br>Andersen, Steven; Rigshospitalet, Department of Otorhinolaryngology—Head & Neck Surgery; Region Hovedstaden, Copenhagen Academy for Medical Education and Simulation (CAMES), Centre for HR and Education and the Capital Region of Denmark |
| <b>Primary Subject Heading</b>: | Medical education and training                                                                                                                                                                                                                                                                                                                                                                                                                                                                                                                                                                                                                                                                                                                                                                                                                                                                                    |
| Secondary Subject Heading:      | Infectious diseases, Public health                                                                                                                                                                                                                                                                                                                                                                                                                                                                                                                                                                                                                                                                                                                                                                                                                                                                                |
| Keywords:                       | COVID-19, MEDICAL EDUCATION & TRAINING, EDUCATION & TRAINING (see Medical Education & Training)                                                                                                                                                                                                                                                                                                                                                                                                                                                                                                                                                                                                                                                                                                                                                                                                                   |
|                                 |                                                                                                                                                                                                                                                                                                                                                                                                                                                                                                                                                                                                                                                                                                                                                                                                                                                                                                                   |

SCHOLARONE™  
Manuscripts



I, the Submitting Author has the right to grant and does grant on behalf of all authors of the Work (as defined in the below author licence), an exclusive licence and/or a non-exclusive licence for contributions from authors who are: i) UK Crown employees; ii) where BMJ has agreed a CC-BY licence shall apply, and/or iii) in accordance with the terms applicable for US Federal Government officers or employees acting as part of their official duties; on a worldwide, perpetual, irrevocable, royalty-free basis to BMJ Publishing Group Ltd ("BMJ") its licensees and where the relevant Journal is co-owned by BMJ to the co-owners of the Journal, to publish the Work in this journal and any other BMJ products and to exploit all rights, as set out in our [licence](#).

The Submitting Author accepts and understands that any supply made under these terms is made by BMJ to the Submitting Author unless you are acting as an employee on behalf of your employer or a postgraduate student of an affiliated institution which is paying any applicable article publishing charge ("APC") for Open Access articles. Where the Submitting Author wishes to make the Work available on an Open Access basis (and intends to pay the relevant APC), the terms of reuse of such Open Access shall be governed by a Creative Commons licence – details of these licences and which [Creative Commons](#) licence will apply to this Work are set out in our licence referred to above.

Other than as permitted in any relevant BMJ Author's Self Archiving Policies, I confirm this Work has not been accepted for publication elsewhere, is not being considered for publication elsewhere and does not duplicate material already published. I confirm all authors consent to publication of this Work and authorise the granting of this licence.

1  
2  
3  
4 1 **Training and education of healthcare workers during viral epidemics: A**  
5 2 **systematic review**  
6  
7  
8

9 4 Leizl Joy Nayahangan<sup>1</sup>, Lars Konge<sup>1,2</sup>, Lene Russell<sup>1,3</sup>, Steven Arild Wuyts Andersen<sup>1,4,5</sup>  
10  
11 5

- 12  
13 6 1. Copenhagen Academy for Medical Education and Simulation (CAMES), Centre for  
14 7 HR and Education and the Capital Region of Denmark, Denmark.  
15  
16 8 2. Department of Clinical Medicine, Faculty of Health and Medical Sciences, University  
17 9 of Copenhagen, Denmark  
18  
19 10 3. Department of Intensive Care, Rigshospitalet, Copenhagen, Denmark  
20  
21 11 4. Department of Otolaryngology, Ohio State University, Columbus, Ohio, USA  
22  
23 12 5. Department of Otorhinolaryngology—Head & Neck Surgery, Rigshospitalet,  
24 13 Copenhagen, Denmark.  
25  
26  
27  
28  
29  
30  
31

32 16 ***Corresponding author:***

33 17 Leizl Joy Nayahangan  
34 18 CAMES Rigshospitalet,  
35 19 Blegdamsvej 9, Copenhagen, Denmark.  
36  
37 20 Email: [leizl.joy.nayahangan@regionh.dk](mailto:leizl.joy.nayahangan@regionh.dk).  
38  
39  
40  
41  
42  
43  
44  
45  
46  
47  
48  
49  
50  
51  
52  
53  
54  
55  
56  
57  
58  
59  
60

## 1 ABSTRACT

2 **Background:** It is necessary to train a large number of healthcare workers within a limited  
3 time to ensure adequate human resources during an epidemic. There remains an urgent need  
4 for best practices on development and implementation of training programs.

5 **Objective:** To explore published literature in relation to training and education for viral  
6 epidemics as well as the effect of these interventions to inform training of healthcare workers.

7 **Data Sources:** Systematic searches in five databases performed between 1 January 2000 and  
8 24 April 2020 for studies reporting on educational interventions in response to major viral  
9 epidemics.

10 **Study Eligibility Criteria:** All studies on educational interventions developed, implemented  
11 and evaluated in response to major global viral outbreaks from 2000 to 2020.

12 **Participants:** Healthcare workers.

13 **Interventions:** Educational or training interventions.

14 **Study Appraisal and Synthesis Methods:** Descriptive information were extracted and  
15 synthesized according to content, competency category, educational methodology, educational  
16 effects and level of educational outcome. Quality appraisal was performed using a criterion-  
17 based checklist.

18 **Results:** A total of 15,676 records were identified and 46 studies were included. Most studies  
19 were motivated by the Ebola virus outbreak with doctors and nurses as primary learners.  
20 Traditional didactic methods were commonly used to teach theoretical knowledge. Simulation-  
21 based training was used mainly for training of technical skills, such as donning and doffing of  
22 personal protective equipment. Evaluation of the interventions consisted mostly of surveys on  
23 learner satisfaction and confidence or tests of knowledge and skills. Only three studies  
24 investigated transfer to the clinical setting or effect on patient outcomes.

### 25 **Conclusions and Implications of findings**

26 The included studies describe important educational experiences from past epidemics with a  
27 variety of educational content, design, and modes of delivery. High level educational evidence  
28 is limited. Evidence-based and standardized training programs that are easily adapted locally  
29 are recommended in preparation for future outbreaks.

1  
2  
3 1 **Keywords:** viral diseases; epidemic; coronavirus; ebolavirus; training  
4  
5  
6 2

7  
8 3 **Strengths and Limitations of this study**  
9

- 10  
11 4 • Inclusion of educational interventional studies in the last twenty years, providing an  
12 5 overview of currently published training programs for healthcare workers and evidence  
13 6 of educational impact.  
14  
15 7 • Systematic search of five academic databases according to the Preferred Reporting  
16 8 Items for Systematic Reviews and Meta-Analyses (PRISMA) guidelines.  
17  
18 9 • Final inclusion of forty-six studies reporting on educational interventions implemented  
19 10 in response to SARS, MERS, EVD and COVID-19.  
20  
21 11 • Exclusion of descriptive studies reporting on development of training programs without  
22 12 evaluation and studies reporting on organizational outcomes with no relevance to  
23 13 training nor evaluation of educational effects.  
24  
25 14 • Important educational efforts not described in published form were not included.  
26  
27  
28  
29  
30  
31  
32  
33  
34 15  
35  
36 16  
37  
38 17  
39  
40  
41  
42  
43  
44  
45  
46  
47  
48  
49  
50  
51  
52  
53  
54  
55  
56  
57  
58  
59  
60

view only

## 1 INTRODUCTION

2 Global-scale infectious diseases engender threat, vulnerability, and risk to health and healthcare  
3 capacity as well as the economic and political stature of a nation.<sup>1</sup> In the last twenty years, the  
4 world has seen several major epidemic outbreaks caused by viral agents—namely severe acute  
5 respiratory syndrome (SARS) in 2003,<sup>2</sup> swine flu (H1N1 influenza virus infection)<sup>3</sup> in 2009–  
6 2019, Middle East respiratory syndrome (MERS) in 2012,<sup>4</sup> and Ebola virus disease (EVD) in  
7 2014–2016.<sup>5</sup> Currently, the entire world is facing a pandemic with a novel coronavirus disease  
8 (COVID-19),<sup>6</sup> a new and fast spreading viral agent that can challenged and even overwhelm  
9 healthcare delivery and capacity as well as human resources. These viral outbreaks have  
10 prompted the need for global communities to swiftly plan, prepare, and ensure continuous  
11 healthcare functionality, resource availability, and skilled manpower to increase surge  
12 capacity.<sup>7</sup>

13 Healthcare professionals from across different areas were called to help and needed to learn  
14 new procedures including correct use of personal protective equipment (PPE)<sup>8</sup> and  
15 management of critically ill patients on ventilatory support.<sup>9</sup> To ensure adequate resources and  
16 staffing, it was necessary to quickly train a large number of healthcare workers (HCW) to be  
17 on the frontlines. Ideally, training and education in preparation for a new infectious threat  
18 should be continuous and planned ahead of time. Specialized training equips healthcare  
19 workers with the knowledge and skills to safely provide patient care; to reduce fatalities during  
20 an outbreak; and to prevent and control nosocomial infections.<sup>10-12</sup>

21 The experiences learned from previous viral epidemics have helped some countries such as  
22 China and Saudi Arabia to deal with and respond to the current COVID-19 pandemic.<sup>13,14</sup>  
23 However, this is not always the case: some countries that ranked high in the preparedness for  
24 pandemics assessed via the Global Health Security Index showed inconsistencies with their  
25 actual performance during the current COVID-19 pandemic.<sup>15</sup> While there are key capacities

1  
2  
3 1 that were considered in this performance assessment, the current pandemic has highlighted the  
4  
5 2 need to increase the number of sufficiently trained healthcare workers.<sup>16</sup> There remains an  
6  
7  
8 3 urgent need for best practices on development and implementation of training programs during  
9  
10 4 an epidemic.

11  
12 5 In this systematic review, we sought to answer three specific research questions:

- 13  
14  
15 6 1. What are the educational content and types of competencies being trained in relation to  
16  
17 7 HCW as a result of a major viral epidemic?  
18  
19 8 2. How can training be delivered under these conditions?  
20  
21  
22 9 3. What are the reported effects of the training interventions?  
23

24  
25 10 The overall aim of the study was to provide an overview of the published literature in relation  
26  
27 11 to training and education of HCW during viral epidemics and to explore the educational content  
28  
29 12 of these interventions and the level of competencies being trained. We also sought to present a  
30  
31 13 status on the evidence of effects of these training interventions.  
32

33  
34 14  
35 15  
36  
37  
38  
39  
40  
41  
42  
43  
44  
45  
46  
47  
48  
49  
50  
51  
52  
53  
54  
55  
56  
57  
58  
59  
60

## 1       2       3       4       5       6       7       8       9       10       11       12       13       14       15       16       17       18       19       20       21       22       23       24       25       26       27       28       29       30       31       32       33       34       35       36       37       38       39       40       41       42       43       44       45       46       47       48       49       50       51       52       53       54       55       56       57       58       59       60

## 1       **METHODS**

2       This systematic review was conducted and reported in adherence with the Preferred Reporting  
3       Items for Systematic Reviews and Meta-analyses (PRISMA) guideline.<sup>17</sup>

### 4       ***Study eligibility***

5       We considered all studies on educational or training interventions developed, evaluated and/or  
6       implemented in response to major global viral outbreaks transmitted via close person-to-person  
7       contact from 2000 to 2020: SARS, H1N1, MERS, EVD, and COVID-19. Inclusion criteria  
8       included studies reporting on development, implementation and evaluation of educational  
9       interventions for HCW while the exclusion criteria were studies that were not in English  
10      language, descriptive studies, and those reporting on organizational outcomes with no  
11      relevance to training nor any outcome measures to evaluate the effect of training (Table 1).

### 12      ***Search strategy***

13      The search strategy was designed to access published literature in health professions education  
14      and clinical journals. Five databases were searched from 1 January 2000–24 April 2020  
15      (PubMed, Excerpta Medica (EMBASE)/Ovid, Cochrane Library, Web of Science, and  
16      Directory of Open Access Journals (DOAJ)) using the search terms (*training OR educat\* OR*  
17      *teach\**) *AND (coronavirus OR SARS OR H1N1 OR MERS OR EBOLA OR COVID-19)*. See  
18      Table 2 for full search details.

### 19      ***Study selection***

20      The search results were retrieved and imported into the Mendeley software (London, UK). Two  
21      authors (LJN and SA) independently reviewed and screened titles and abstracts, and eligible  
22      studies were included for full-text screening using Covidence (Veritas Health Innovation,  
23      Melbourne, Australia). The same reviewers independently screened the studies for eligibility  
24      and final inclusion. Disagreements were resolved with the remaining co-authors.



1  
2  
3 1 **Data extraction and synthesis**  
4

5 2 A data extraction form was developed in REDCap (Vanderbilt University, USA) and was  
6  
7 3 piloted with five randomly selected studies. Discrepancies in extraction and analysis by the two  
8  
9 4 reviewers were discussed and the form was revised. The following details were extracted:  
10  
11 5 general study information including study design; viral illness; target learner population and  
12  
13 6 learner level; competency category; educational modality; description of intervention;  
14  
15 7 description of educational outcomes; quality appraisal of the educational intervention in  
16  
17 8 different stages (preparation, intervention and evaluation) based on a structured criterion-based  
18  
19 9 checklist;<sup>18</sup> and level of educational outcome based on Kirkpatrick's levels and education  
20  
21 10 evidence.<sup>19</sup> Synthesis was aligned with the three research questions. It was decided a priori to  
22  
23 11 forego meta-analyses because of our specific research questions and expected variety of study  
24  
25 12 population, interventions, context and educational outcomes.  
26  
27  
28  
29

30 13 **Patient and public involvement:** There were no patients nor the public that were involved in  
31  
32 14 the design, or conduct, or reporting, or dissemination plans of this systematic review.  
33  
34  
35  
36  
37  
38  
39  
40  
41  
42  
43  
44  
45  
46  
47  
48  
49  
50  
51  
52  
53  
54  
55  
56  
57  
58  
59  
60

## 1 RESULTS

### 2 *Study selection process*

3 Flow chart is provided in Figure 1. A total of 15,676 records were identified through the  
4 searches. Of these, 10,092 studies remained after removal of duplicates and studies not reported  
5 in English. Three hundred and four studies were included for full-text screening of which 46  
6 studies fulfilled the inclusion criteria (Table S1).

### 7 *Study characteristics*

8 Study characteristics are presented in Table 3. A majority of the studies reported on learning  
9 interventions developed in response to EVD (n=24, 52%),<sup>20-43</sup> eight studies were motivated by  
10 SARS (17%),<sup>44-51</sup> seven studies by H1N1 influenza (15%),<sup>52-58</sup> one study by MERS (2%),<sup>59</sup>  
11 and three studies were motivated by more than one disease.<sup>60-62</sup> Three studies were published  
12 in relation to COVID-19.<sup>63-65</sup>

13 The majority of the studies used a single-group study design (n=16, 37%) or were educational  
14 cohort studies (n=16, 35%). Two were non-randomised trials (4%)<sup>36,47</sup> and six studies were  
15 randomised controlled trials (13%).<sup>21,42,45,50,57,64</sup> Medical doctors and nurses were the targeted  
16 learners in most of the studies (n=18 (39%) and n=25 (54%), respectively). Other healthcare  
17 professionals included were for example paramedics,<sup>20,59</sup> respiratory therapists,<sup>38,50,58</sup>  
18 pharmacists,<sup>43,58,61</sup> and midwives.<sup>39,42,43</sup> Students in relevant fields were included in some  
19 studies.<sup>28,29,48,49,55,60,64,65</sup>

### 20 *Educational content and competency category*

21 *Theoretical knowledge.* Thirty-five studies (76%) reported on development of theoretical  
22 courses to educate and inform HCW regarding general principles of epidemic preparedness,  
23 disease presentation, surveillance, and treatment. Resources for course content could originate  
24 from international agencies such as the World Health Organization (WHO), from the Centers  
25 for Disease Control and Prevention (CDC)<sup>66</sup> or from official guidelines implemented by local

1 health and infectious disease authorities to aid the hospitals.<sup>26</sup> Knowledge on infection  
2 prevention and control (IPC) including patient care principles and safety practices were central  
3 in many of the included studies.<sup>23,27,33,36,37,43,47,51,60</sup>

4 *Technical skills.* In 26 studies (57%), the focus was on technical skills particularly on risk  
5 management strategies such as donning and doffing of PPE.<sup>20,21,27,28,31,36-38,40,43,52,59,63,64</sup> One  
6 study reported that while PPE skills can be mastered in a controlled learning environment,  
7 maintaining the integrity of the procedure during critical situations is challenging, as well as  
8 measures to reduce risk of self-contamination.<sup>20,21</sup> Critical care management skills were also  
9 often trained including endotracheal intubation, airway management techniques, manual and  
10 mechanical ventilation;<sup>27,38,60,65</sup> advanced cardiac and airway life support (ACLS/AALS);<sup>44,46</sup>  
11 and extracorporeal membrane oxygenation (ECMO) management.<sup>53,56</sup>

12 *“Non-technical” skills.* Eight (17%) studies described a variety of other skills such as  
13 teamwork and cognitive load,<sup>21</sup> interpersonal skills, reporting and decision making,<sup>49</sup> attitude,<sup>39</sup>  
14 critical thinking skills,<sup>61</sup> concern and confidence.<sup>32</sup> Psychological support for HCW was  
15 highlighted in three studies that designed educational interventions on psychological first aid<sup>42</sup>  
16 and resilience.<sup>57,62</sup> Another study highlighted the importance of interpersonal skills for  
17 screening personnel to manage the high number of potentially anxious patients and visitors.<sup>49</sup>

#### 18 *Training delivery*

19 *Traditional didactics.* Thirteen out of 46 studies (28%) used traditional didactics such as  
20 lectures and other adult learning strategies including interactive group and learner-led  
21 discussions,<sup>52,54,61</sup> case-based learning,<sup>29,55</sup> problem-based learning,<sup>48</sup> demonstrations/return  
22 demonstrations,<sup>41,49</sup> and role playing.<sup>49,54</sup> Most of the studies that aimed to convey theoretical  
23 knowledge consisted of brief sessions, i.e. less than a day (n=8/13, 62%).<sup>41,42,48-51,61,62</sup>

24 *E-learning.* E-learning has been used to rapidly disseminate information during an epidemic  
25 outbreak. One study found that e-learning could be used to significantly increase knowledge

1 on a pre- and post-learning test as well as retention test.<sup>32</sup> Other studies used CD/DVD or USB  
2 drives to disseminate course materials for self-learning, as well as audio/ video mini lectures  
3 <sup>35,47,57,60</sup> and specific software for interactive online learning.<sup>36,39</sup>

4 *Simulation-based training.* In 31 studies (67%), simulation-based training (SBT) was an  
5 integral part of the training intervention. This ranged from skills stations to practice relevant  
6 clinical procedures such as airway management or central venous catheter placement,<sup>27,38,63</sup> to  
7 the use of high-fidelity and interactive simulation equipment for large scale scenario  
8 training.<sup>24,27,44</sup> The majority of the studies focused on training of correct use of PPE, while a  
9 few studies also used simulation to train interpersonal skills and team training.<sup>38,56,58</sup> The  
10 duration of SBT was variable across studies, ranging from shorter sessions<sup>21,44,64</sup> to multi-day  
11 courses.<sup>26,33,36,37,43,53</sup>

#### 12 *Effects and level of educational outcome*

13 Eight out of 46 studies (17%) evaluated the learning outcome at Kirkpatrick level 1 i.e. the  
14 learners' satisfaction and experience with the training intervention. All these studies  
15 concordantly found that learners were satisfied with training regardless of the  
16 intervention.<sup>24,31,37,44,49,53,60,62</sup>

17 Modification of attitude or perceptions (Kirkpatrick level 2a) were an outcome in five studies  
18 (11%). In one of these studies it was reported that the participants felt more confident after the  
19 intervention that consisted of 80 hours of lectures and simulation-based training of care and  
20 management of the infected patient.<sup>27</sup>

21 The majority of the studies (n=29, 63%) reported on modification of knowledge and/or skills  
22 (Kirkpatrick level 2b) resulting from the educational intervention. A significant decrease in  
23 number of errors in donning and doffing of PPE was demonstrated in one study after a single  
24 1-hour theoretical session combined with three simulation sessions, which were repeated after  
25 72 hours.<sup>28</sup> A longer 3-day course of e-learning and simulation-based training regarding safety

1  
2  
3 1 measures in EVD patient care reported a significant increase in knowledge scores from pre- to  
4  
5 2 post-intervention as well as an overall high performance in the simulation scenario on PPE  
6  
7  
8 3 use.<sup>36</sup>  
9

10  
11 4 Only one study reported on behavioural change in the clinic among the participants who  
12  
13 5 correctly used PPE after supplemental SBT as compared to the ones who underwent the  
14  
15 6 standard training (Kirkpatrick level 3).<sup>45</sup> Change in organizational practice (Kirkpatrick level  
16  
17 7 4a) was reported following simulation-based training in IPC, which led to a decrease in  
18  
19 8 infection rate amongst HCW.<sup>23</sup> Two studies included Kirkpatrick level 4b evaluation by  
20  
21 9 demonstrating a benefit to patients or clients directly attributable to the training  
22  
23 10 intervention.<sup>23,56</sup> In one of these, decreased mortality rates in ECMO patients was found after  
24  
25 11 implementation of an ECMO training program (66.7% vs. 91.3%,  $p=0.013$ ).<sup>56</sup>  
26  
27  
28  
29  
30 12

## 1 DISCUSSION

2 In this systematic review, we identified 46 studies on training and educational interventions for  
3 HCW that were developed and implemented due to an ongoing or a recent major viral epidemic.

### 4 *Target population and characteristics*

5 Most of the educational interventions were prompted by the urgent need to train HCW,  
6 especially in relation to the EVD outbreak, which had the highest case fatality rate at 40.4%  
7 compared with SARS (9.6%), MERS (34%), H1N1 (0.02%), and COVID-19 (3.4% as of 3  
8 March 2020).<sup>67</sup> EVD training programs were initiated for all HCW who were deployed to the  
9 frontlines mainly focused on IPC procedures and the proper use of PPE. For the other viral  
10 diseases, a surge of critically ill patients with respiratory failure has prompted many of the  
11 simulation-based interventions to train critical care management skills such as ACLS/AALS  
12 and ECMO.<sup>44,46,53,56</sup> All these high risk infections also expose HCW to psychological hazards  
13 such as fatigue, occupational burnout and distress, furthermore highlighting that psychological  
14 support to maintain the well-being of HCW during a pandemic is imperative, as seen in a  
15 number of studies.<sup>34,42,62,68</sup>

### 16 *Educational content and competency category*

17 The use of traditional didactic methods to teach theoretical knowledge is common when a large  
18 number of learners need to be targeted at the same time. Depending on the learning goals,  
19 theoretical knowledge can be efficiently delivered in less than a day, and brief sessions are  
20 particularly efficient if modules are spaced (i.e. distributed learning) as demonstrated in several  
21 of the included studies.<sup>28,46,61</sup>

22 The advent of e-learning, including web-based and other technology enhanced learning, has  
23 opened immense opportunities for flexible dissemination of information notwithstanding time  
24 and location.<sup>69</sup> This poses an advantage, especially for HCW in remote locations, where

1 learning resources can be accessed in their own time and without potential transmission of  
2 infection between the learners. E-learning is dependent on online access which could be a  
3 challenge in rural communities with limited network coverage.<sup>35</sup> In light of COVID-19, the  
4 WHO Health Emergencies Programme has launched free online training resources, providing  
5 HCW and staff access to real-time knowledge on how to detect, prevent and respond to the  
6 new coronavirus.<sup>70</sup> In medical education, e-learning has been found to have large positive  
7 effects and is especially effective when combined with other educational modalities.<sup>69</sup>

8 SBT has also been increasingly utilized as an integral part of medical training with positive  
9 effects on knowledge, skills and behaviors.<sup>71,72</sup> In the context of a viral outbreak, simulation  
10 provides a safe and controlled environment for training of emergency response including  
11 teamwork and system readiness. This is corroborated by the included studies on PPE, which  
12 found that participants benefitted from repeated training of donning and doffing; of efficiently  
13 performing procedures whilst wearing a constricting PPE; and the use of full-scale scenarios  
14 for team-based training.<sup>38,44</sup>

15 These three major educational strategies can all be used in combination and integrated in a  
16 structured curriculum to achieve an optimized learning experience.<sup>73</sup> Several of the included  
17 studies achieved this by using e-learning to provide pre-course materials, allowing for self-  
18 learning prior to course start, then theoretical teaching through lectures and other interactive  
19 learning strategies such as group exercises and discussions, and finally practical skills training  
20 in a simulated setting.<sup>74</sup> Multi-modality and extensive training presents a challenge especially  
21 for countries with limited resources,<sup>75</sup> however, standardised training programs that are  
22 supported by the international communities and the local government bodies seem to help  
23 alleviate this.

1  
2  
3 1 *Training delivery and effects and level of educational outcome*  
4  
5

6 2 In the included studies, effect of training varied across educational strategies and mode of  
7  
8 3 evaluation. Interestingly, duration of the training intervention did not seem to correlate with  
9  
10 4 the relative effect on the educational outcome: for example, a 3-day workshop on EVD  
11  
12 5 management resulted in an increase of correctly answered questions from a pre-workshop  
13  
14 6 median of 7 to a post-median of 9 (~29% increase);<sup>26</sup> whereas a 3-hr training session on EVD  
15  
16 7 awareness demonstrated an improvement in knowledge from the mean baseline score of 3.93  
17  
18 8 to a mean score of 13.18 after intervention (~235% increase).<sup>41</sup> This illustrates that training  
19  
20 9 outcome is very much dependent on the objectives of the training and how it is evaluated. It is  
21  
22 10 also important to be critical in regard to the size of the effects of training reported: a 2-hour  
23  
24 11 session on SARS<sup>47</sup> reported a statistically significant increase in knowledge, however, the  
25  
26 12 actual change in test scores from pre- to post-training intervention was only 3% and therefore  
27  
28 13 of limited consequence.  
29  
30  
31  
32  
33

34 14 Most of the included studies reported outcomes of the educational intervention at the level of  
35  
36 15 learner satisfaction (level 1), modification of attitude (level 2a), and modification of knowledge  
37  
38 16 and skills (level 2b) without evaluating if the training affected clinical practice. Learner  
39  
40 17 satisfaction and attitude are typically measured using post-course surveys and changes in  
41  
42 18 knowledge and skills by pre-and post-training tests. Unsurprisingly, these will almost always  
43  
44 19 result in high levels of satisfaction, increase in confidence and improvement in knowledge and  
45  
46 20 skills after intervention.<sup>76</sup> Further, these outcomes provide little to no information on actual  
47  
48 21 performance and translation into improved performance in the clinical environment and/or  
49  
50 22 patient outcomes.<sup>76</sup>  
51  
52  
53  
54  
55

56 23  
57  
58

59 24  
60



## 1 *Implications and perspectives*

2 The current pandemic has highlighted that despite many relevant training interventions already  
3 developed, these seem to not have been widely adapted or implemented There is a need for  
4 structured and evidence-based training programs that are easily replicated and adaptable to  
5 local contexts and settings.<sup>18</sup> Development of educational interventions should follow a  
6 systematic approach such as Kern's six-step model:<sup>73</sup> starting with a general needs assessment  
7 to identify gaps and learner needs; a targeted needs assessment to align to targeted context;  
8 definition of goals and objectives including plans for assessment to ensure that the learning  
9 goals are met and that learning outcomes are measured appropriately (i.e. knowledge and skills  
10 transfer into the clinical environment);<sup>77,78</sup> selection of educational modalities, which could  
11 include different categories of knowledge, technical skills and "non-technical" skills);<sup>73,79</sup> and  
12 finally, plans for implementation and evaluation of the training program.

13 Training should be optimized and implemented based on learning needs, conditions and  
14 resources, allowing for deliberate and distributed practice over time.<sup>80</sup> Assessment of the effect  
15 of learning interventions plays a critical role and ultimately, provides evidence for improved  
16 patient outcomes.<sup>73,81</sup> At present, evidence regarding training and education in preparation for  
17 a viral epidemic is sparse and not any of the interventions included in this review has followed  
18 a structured model for curriculum development nor has undergone rigorous evaluation.

19 We recommend medical educators to share and publish their actual results or design of  
20 educational studies as additional resources in keeping with high standards and to collect  
21 evidence for their educational interventions.<sup>82</sup> To ensure that key information are gathered and  
22 reported, the criterion-based checklist that was used in this study can guide the development  
23 and implementation of quality educational interventions. Interestingly, we note that scientific  
24 studies spike during or shortly after the onset of the viral epidemic and tend to decline after a

1  
2  
3 1 few years. With more than 61,000 studies found in PubMed relating to the five viral diseases,  
4  
5 2 less than 6% relates to education and training and of these, only 46 were educational  
6  
7 3 interventional studies. This further highlights the need for careful planning and refinement of  
8  
9 4 training interventions also post-epidemic, by systematically improving educational approach,  
10  
11 5 study design and outcome measures so that these efforts can prepare the medical community  
12  
13 6 best possibly for the next epidemic. Educational research should not solely be performed during  
14  
15 7 an ongoing viral epidemic where the stakes are high and the conditions for teaching and training  
16  
17 8 are far from optimal. We recommend that educational interventional studies such as  
18  
19 9 randomised controlled trials are performed before another pandemic happens in order to gather  
20  
21 10 and establish evidence-based educational practices that will best equip and certify healthcare  
22  
23 11 workers with the competences needed in the front lines.  
24  
25  
26  
27  
28

### 29 12 *Strengths and limitations*

30  
31  
32 13 A strength of this review is the inclusion of educational interventional studies in the last twenty  
33  
34 14 years, providing an overview of the currently published training programs for HCW and their  
35  
36 15 evidence. A limitation relates to the exclusion of descriptive studies reporting on the  
37  
38 16 development of training programs without evaluation. Many of the included studies were not  
39  
40 17 conducted to the highest standards in medical education. We also think that there is a substantial  
41  
42 18 educational effort that goes unreported. Another limitation is the exclusion of non-English  
43  
44 19 language studies which could have helped answer the first research question given that most  
45  
46 20 of the reports concerning viral epidemics come from non-English speaking nations. Finally, we  
47  
48 21 did not include studies that solely evaluated organizational or system-wide impact of  
49  
50 22 interventions because we aimed in this review to focus on how to train HCW rather than how  
51  
52 23 to improve systems through training.  
53  
54  
55  
56  
57  
58  
59  
60

1  
2  
3 1 *Conclusion*  
4  
5

6 2 Published educational interventional studies in relation to training during viral epidemics  
7  
8 3 demonstrate a variety of educational content, design, strategies and modes of delivery. Overall,  
9  
10 4 the included studies consistently reported positive benefits of any structured training  
11  
12 5 intervention including positive effects on confidence and knowledge. However, there are very  
13  
14 6 few studies evaluating that these training efforts transfer into improved clinical performance  
15  
16 7 and better patient outcomes. Development and implementation of evidence-based training  
17  
18 8 programs that can be easily adapted locally are required for the medical community to be well-  
19  
20 9 prepared for the next viral epidemic outbreak.  
21  
22  
23  
24  
25  
26  
27  
28  
29  
30  
31  
32  
33  
34  
35  
36  
37  
38  
39  
40  
41  
42  
43  
44  
45  
46  
47  
48  
49  
50  
51  
52  
53  
54  
55  
56  
57  
58  
59  
60

1  
2  
3 1 **Contributors:** All authors have contributed substantially from conception to writing the final  
4  
5 2 version of the manuscript. All authors (LJN, LR, LK and SA) were involved in the conception  
6  
7 3 and design of the study. LJN and SA performed the systematic search, including review and  
8  
9 4 screening for inclusion while LR and LK participated in resolution of disagreements. LJN,  
10  
11 5 LR, LK and SA were involved in the analysis, synthesis and interpretation of the data. LJN  
12  
13 6 wrote the first draft of the paper with supervision from SA and reviewed by LR and LK. All  
14  
15 7 authors were involved in the revision of the manuscript for relevant scientific content and have  
16  
17 8 approved the final version of the manuscript. All authors are accountable for the accuracy and  
18  
19 9 integrity of this work.  
20  
21  
22

23  
24 10 **Acknowledgements:** The authors sincerely thank Jonathan Lawaetz for developing the data  
25  
26 11 extraction form in RedCap, and for organising the data derived from the system.  
27

28 12 **Ethical approval:** This review did not involve patients and was therefore exempt from ethical  
29  
30 13 approval according to Danish legislation.  
31

32  
33 14 **Patient consent for publication:** Not required. There were no participants included in this  
34  
35 15 study.  
36

37  
38 16 **Conflicts of interest:** All authors do not have any conflicts of interest nor disclosures to declare.  
39

40  
41 17 **Financial disclosures:** No funding  
42

43 18 **Data sharing statement:** An overview of the educational interventional studies included in this  
44  
45 19 systematic review regarding training and education of healthcare workers during viral  
46  
47 20 epidemics including characteristics and general description is uploaded as a supplementary  
48  
49 21 information (Table S1). No additional data available.  
50  
51  
52

53 22  
54  
55  
56  
57  
58  
59  
60

1  
2  
3  
4  
5  
6  
7  
8  
9  
10  
11  
12  
13  
14  
15  
16  
17  
18  
19  
20  
21  
22  
23  
24  
25  
26  
27  
28  
29  
30  
31  
32  
33  
34  
35  
36  
37  
38  
39  
40  
41  
42  
43  
44  
45  
46  
47  
48  
49  
50  
51  
52  
53  
54  
55  
56  
57  
58  
59  
60  
1 REFERENCES

1. Smith KF, Goldberg M, Rosenthal S, et al. Global rise in human infectious disease outbreaks. *J R Soc Interface*. 2014;11(101):20140950.
2. Peiris JS, Yuen KY, Osterhaus AD, Stöhr K. The severe acute respiratory syndrome. *N Engl J Med*. 2003;349(25):2431-2441.
3. Coker R. Swine flu. *BMJ*. 2009;338:b1791.
4. Zumla A, Hui DS, Perlman S. Middle East respiratory syndrome. *The Lancet*. 2015;386(9997):995-1007.
5. Team WER. Ebola virus disease in West Africa—the first 9 months of the epidemic and forward projections. *N Engl J Med*. 2014;371(16):1481-1495.
6. Phelan AL, Katz R, Gostin LO. The Novel Coronavirus Originating in Wuhan, China: Challenges for Global Health Governance. *JAMA*. 2020.
7. Fineberg HV. Pandemic preparedness and response--lessons from the H1N1 influenza of 2009. *N Engl J Med*. 2014;370(14):1335-1342.
8. Maxwell DN, Perl TM, Cutrell JB. "The Art of War" in the Era of Coronavirus Disease 2019 (COVID-19). *Clin Infect Dis*. 2020.
9. Phua J, Weng L, Ling L, et al. Intensive care management of coronavirus disease 2019 (COVID-19): challenges and recommendations. *Lancet Respir Med*. 2020.
10. Adams JG, Walls RM. Supporting the Health Care Workforce During the COVID-19 Global Epidemic. *JAMA*. 2020.
11. Rajakaruna SJ, Liu W-B, Ding Y-B, Cao G-W. Strategy and technology to prevent hospital-acquired infections: Lessons from SARS, Ebola, and MERS in Asia and West Africa. *Mil. Med. Res*. 2017;4(1):32.
12. Xiao J, Fang M, Chen Q, He B. SARS, MERS and COVID-19 among Healthcare Workers: A Narrative Review. *J. Infect. Public Health*. 2020.
13. Xiao Y, Torok ME. Taking the right measures to control COVID-19. *Lancet Infect Dis*. 2020;20(5):523-524.
14. Algaissi AA, Alharbi NK, Hassanain M, Hashem AM. Preparedness and response to COVID-19 in Saudi Arabia: Building on MERS experience. *J. Infect. Public Health*. 2020;13(6):834-838.
15. Fisher D, Teo YY, Nabarro D. Assessing national performance in response to COVID-19. *The Lancet*. 2020;396(10252):653-655.
16. Li L, Xv Q, Yan J. COVID-19: the need for continuous medical education and training. *Lancet Respir Med*. 2020.

- 1  
2  
3 17. Moher D, Liberati A, Tetzlaff J, Altman DG. Preferred reporting items for systematic  
4 reviews and meta-analyses: the PRISMA statement. *Ann Intern Med*.  
5 2009;151(4):264-269.  
6  
7 18. Meinema JG, Buwalda N, van Etten-Jamaludin FS, Visser MRM, van Dijk N.  
8 Intervention Descriptions in Medical Education: What Can Be Improved? A  
9 Systematic Review and Checklist. *Acad Med*. 2019;94(2):281-290.  
10  
11 19. Yardley S, Dornan T. Kirkpatrick's levels and education 'evidence'. *Med Educ*.  
12 2012;46(1):97-106.  
13  
14 20. Abualenain JT, Al-Alawi MM. Simulation-based training in Ebola Personal  
15 Protective Equipment for healthcare workers: Experience from King Abdulaziz  
16 University Hospital in Saudi Arabia. *J. Infect. Public Health*. 2018;11(6):796-800.  
17  
18 21. Andonian J, Kazi S, Therkorn J, et al. Effect of an Intervention Package and  
19 Teamwork Training to Prevent Healthcare Personnel Self-contamination During  
20 Personal Protective Equipment Doffing. *Clin Infect Dis*.  
21 2019;69(Supplement\_3):S248-S255.  
22  
23 22. Bazeyo W, Bagonza J, Halage A, et al. Ebola a reality of modern Public Health; need  
24 for Surveillance, Preparedness and Response Training for Health Workers and other  
25 multidisciplinary teams: a case for Uganda. *Pan Afr Med J*. 2015;20:404-404.  
26  
27 23. Bemah P, Baller A, Cooper C, et al. Strengthening healthcare workforce capacity  
28 during and post Ebola outbreaks in Liberia: an innovative and effective approach to  
29 epidemic preparedness and response. *Pan Afr Med J*. 2019;33(Suppl 2):9-9.  
30  
31 24. Bredmose PP, Sollid S. From in-situ simulation to SOP development. *Acta*  
32 *Anaesthesiol Scand*. 2015;59:26-26.  
33  
34 25. Bustamante ND, O'Keeffe D, Bradley D, Pozner CN. Targeted interprofessional  
35 simulation-based training for safe patient management of Ebola virus disease. *Acad*  
36 *Emerg Med*. 2015;22(5):S328-S328.  
37  
38 26. Carlos C, Capistrano R, Tobora CF, et al. Hospital preparedness for Ebola virus  
39 disease: a training course in the Philippines. *WPSAR*. 2015;6(1):33-43.  
40  
41 27. Carvalho E, Castro P, Leon E, et al. Multi-professional simulation and risk perception  
42 of health care workers caring for Ebola-infected patients. *Nurs Crit Care*.  
43 2019;24(5):256-262.  
44  
45 28. Casalino E, Astocondor E, Sanchez JC, Diaz-Santana DE, Del Aguila C, Carrillo JP.  
46 Personal protective equipment for the Ebola virus disease: A comparison of 2 training  
47 programs. *Am J Infect Control*. 2015;43(12):1281-1287.  
48  
49  
50  
51  
52  
53  
54  
55  
56  
57  
58  
59  
60

- 1  
2  
3 1 29. Dube D, Addy TM, Teixeira MR, Iadarola LM. Enhancing Student Learning on  
4 Emerging Infectious Diseases: An Ebola Exemplar. *Am Biol Teach*. 2018;80:493-500.  
5 2  
6 30. Eardley W, Bowley D, Hunt P, Round J, Tarmey N, Williams A. Education and  
7 3  
8 Ebola: initiating the cascade of emergency healthcare training. *JRAMC*.  
9 4  
10 2016;162(3):203-206.  
11 5  
12 31. Eckes EJ, Gutierrez D, Peterson A, Hubbard M, Barrett K, Matlock AM. Educating  
13 6  
14 Health Care Providers in Treatment of Patients With Ebola Virus Disease. *Crit care*  
15 7  
16 *nurse*. 2016;36(5):e8-e13.  
17 8  
18 32. Ferranti EP, Wands L, Yeager KA, et al. Implementation of an educational program  
19 9  
20 for nursing students amidst the Ebola virus disease epidemic. *Nurs Outlook*.  
21 10  
22 2016;64(6):597-603.  
23 11  
24 33. Jones-Konneh TEC, Murakami A, Sasaki H, Egawa S. Intensive Education of Health  
25 12  
26 Care Workers Improves the Outcome of Ebola Virus Disease: Lessons Learned from  
27 13  
28 the 2014 Outbreak in Sierra Leone. *Tohoku J of Exp Med*. 2017;243(2):101-105.  
29 14  
30 34. Klomp RW, Jones L, Watanabe E, Thompson WW. CDC's Multiple Approaches to  
31 15  
32 Safeguard the Health, Safety, and Resilience of Ebola Responders. *Prehosp Disaster*  
33 16  
34 *Med*. 2020;35(1):69-75.  
35 17  
36 35. Mc Kenna P, Babughirana G, Amponsah M, et al. Mobile training and support  
37 18  
38 (MOTS) service-using technology to increase Ebola preparedness of remotely-located  
39 19  
40 community health workers (CHWs) in Sierra Leone. *mHealth*. 2019;5:35-35.  
41 20  
42 36. MenkinSmith L, Lehman-Huskamp K, Schaefer J, et al. A Pilot Trial of Online  
43 21  
44 Simulation Training for Ebola Response Education. *Health secur*. 2018  
45 22  
46 Nov/Dec;16(6):391-401.  
47 23  
48 37. Narra R, Sobel J, Piper C, et al. CDC safety training course for ebola virus disease  
49 24  
50 healthcare workers. *Emerg Infect Dis*. 2017;23:S217-S224.  
51 25  
52 38. O'Keeffe DA, Bradley D, Evans L, et al. Ebola Emergency Preparedness: Simulation  
53 26  
54 Training for Frontline Health Care Professionals. *MedEdPORTAL*. 2016;12:10433-  
55 27  
56 10433.  
57 28  
58 39. Otu A, Ebenso B, Okuzu O, Osifo-Dawodu E. Using a mHealth tutorial application to  
59 29  
60 change knowledge and attitude of frontline health workers to Ebola virus disease in  
Nigeria: a before-and-after study. *Hum Resour Health*. 2016;14:5-5.
40. Phrampus PE, O'Donnell JM, Farkas D, et al. Rapid Development and Deployment of  
Ebola Readiness Training Across an Academic Health System: The Critical Role of

- 1  
2  
3 1 Simulation Education, Consulting, and Systems Integration. *Simul Healthc.*  
4 2016;11(2):82-88.  
5 2  
6 3 41. Rehman H, Ghani M, Rehman M. Effectiveness of basic training session regarding  
7 4 the awareness of Ebola virus disease among nurses of public tertiary care hospitals of  
8 5 Lahore. *J Pak Med Assoc.* 2020;70:477-481.  
9 6 42. Sijbrandij M, Horn R, Esliker R, et al. The Effect of Psychological First Aid Training  
10 7 on Knowledge and Understanding about Psychosocial Support Principles: A Cluster-  
11 8 Randomized Controlled Trial. *Int J Environ Res Public Health.* 2020;17(2).  
12 9 43. Soeters HM, Koivogui L, de Beer L, et al. Infection prevention and control training  
13 10 and capacity building during the Ebola epidemic in Guinea. *PloS one.*  
14 11 2018;13(2):e0193291-e0193291.  
15 12 44. Abrahamson SD, Canzian S, Brunet F. Using simulation for training and to change  
16 13 protocol during the outbreak of severe acute respiratory syndrome. *Crit Care.*  
17 14 2006;10(1):R3-R3.  
18 15 45. Carrico RM, Coty MB, Goss LK, LaJoie AS. Changing health care worker behavior  
19 16 in relation to respiratory disease transmission with a novel training approach that uses  
20 17 biosimulation. *Am J Infect Control.* 2007;35:14-19.  
21 18 46. Chen P-T, Huang Y-C, Cheng H-W, et al. New simulation-based airway management  
22 19 training program for junior physicians: Advanced Airway Life Support. *Med teach.*  
23 20 2009;31(8):e338-344.  
24 21 47. Lin C-F, Yang C-Y, Lu M-S, Kao C-C. Effectiveness of a nosocomial infection  
25 22 control training in improving knowledge in patient-hired attendants and outsourced  
26 23 workers in Taiwan. *JNR.* 2008;16(3):187-194.  
27 24 48. Marshall CS, Yamada S, Inada MK. Using problem-based learning for pandemic  
28 25 preparedness. *Kaohsiung J Med Sci.* 2008;24(3 Suppl):S39-45.  
29 26 49. McInnes K, Safian L. Keeping SARS out: an education program for SARS screeners  
30 27 in one Ontario hospital. *JNSD.* 2005;21(2):73-78.  
31 28 50. Rogers B, Buckheit K, Ostendorf J. Development of Competencies for Respiratory  
32 29 Protection for Health Care Workers. *Workplace Health Saf.* 2019;67(2):56-67.  
33 30 51. Wu C-J, Gardner G, Chang AM. Nursing students' knowledge and practice of  
34 31 infection control precautions: an educational intervention. *J Adv Nurs.*  
35 32 2009;65(10):2142-2149.  
36  
37  
38  
39  
40  
41  
42  
43  
44  
45  
46  
47  
48  
49  
50  
51  
52  
53  
54  
55  
56  
57  
58  
59  
60



- 1  
2  
3 1 52. Adini B, Goldberg A, Cohen R, Bar-Dayyan Y. Impact of pandemic flu training on  
4 ability of medical personnel to recognize an index case of avian influenza. *Eur J*  
5 *Public Health*. 2012;22(2):169-173.  
6  
7 3  
8 4 53. Brazzi L, Lissoni A, Panigada M, et al. Simulation-based training of extracorporeal  
9 membrane oxygenation during H1N1 influenza pandemic: the Italian experience.  
10 *Simul Healthc*. 2012;7(1):32-34.  
11  
12 6  
13 7 54. Diaz JV, Lister P, Ortiz JR, Adhikari NK, Adhikari N. Development of a severe  
14 influenza critical care curriculum and training materials for resource-limited settings.  
15 *Crit Care* 2013;17:S184-S185.  
16  
17 9  
18 10 55. Diaz JV, Ortiz JR, Lister P, Shindo N, Adhikari NKJ. Development of a short course  
19 on management of critically ill patients with acute respiratory infection and impact on  
20 clinician knowledge in resource-limited intensive care units. *Influenza Other Resp*.  
21 2018;12(5):649-655.  
22  
23 12  
24 13  
25 14 56. Kim G-W, Koh Y, Lim C-M, et al. The effect of an improvement of experience and  
26 training in extracorporeal membrane oxygenation management on clinical outcomes.  
27 *Korean J Intern Med*. 2018;33(1):121-129.  
28  
29 16  
30 17 57. Maunder RG, Lancee WJ, Mae R, et al. Computer-assisted resilience training to  
31 prepare healthcare workers for pandemic influenza: a randomized trial of the optimal  
32 dose of training. *BMC Health Serv Res*. 2010;10:72-72.  
33  
34 19  
35 20 58. Watson CM, Duval-Arnould JM, McCrory MC, et al. Simulated pediatric  
36 resuscitation use for personal protective equipment adherence measurement and  
37 training during the 2009 influenza (H1N1) pandemic. *Jt Comm J Qual Saf*.  
38 2011;37(11):515-523.  
39  
40 22  
41 23  
42 24 59. Elcin M, Onan A, Odabasi O, et al. Developing a Simulation-Based Training Program  
43 for the Prehospital Professionals and Students on the Management of Middle East  
44 Respiratory Syndrome. *Simul Healthc*. 2016;11(6):394-403.  
45  
46 26  
47 27 60. Hanley ME, Bogdan GM. Mechanical ventilation in mass casualty scenarios.  
48 Augmenting staff: Project XTREME. *Respir Care*. 2008;53:176-188.  
49  
50 28  
51 29 61. Mathias C. A Learner-led, Discussion-based Elective on Emerging Infectious Disease.  
52 *Am J Pharm Educ*. 2015;79.  
53  
54 30  
55 31 62. Aiello A, Khayeri MY-E, Raja S, et al. Resilience training for hospital workers in  
56 anticipation of an influenza pandemic. *J Contin Educ Health Prof*. 2011;31(1):15-20.  
57  
58  
59  
60

- 1  
2  
3 1 63. Choi GYS, Wan WTP, Chan AKM, Tong SK, Poon ST, Joynt GM. Preparedness for  
4 COVID-19: in situ simulation to enhance infection control systems in the intensive  
5 care unit. *Br J Anaesth*. 2020.  
6  
7 3  
8 4 64. Christensen L, Rasmussen CS, Benfield T, Franc JM. A Randomized Trial of  
9 Instructor-Led Training Versus Video Lesson in Training Health Care Providers in  
10 Proper Donning and Doffing of Personal Protective Equipment. *Disaster Med Public*  
11 *Health Prep*. 2020:1-15.  
12 6  
13 7  
14 8 65. Zhou T, Huang S, Cheng J, Xiao Y. The Distance Teaching Practice of Combined  
15 Mode of Massive Open Online Course Micro-Video for Interns in Emergency  
16 Department During the COVID-19 Epidemic Period. *Telemed J E Health*. 2020.  
17 9  
18 10  
19 11 66. Centers for Disease Control and Prevention (CDC). Training for Healthcare  
20 Professionals. <https://www.cdc.gov/coronavirus/2019-ncov/hcp/training.html>.  
21 Accessed: 20 April 2020  
22 12  
23 13  
24 14 67. El Elflein J. Fatality rate of major virus outbreaks in the last 50 years as of 2020;  
25 [https://www.statista.com/statistics/1095129/worldwide-fatality-rate-of-major-virus-](https://www.statista.com/statistics/1095129/worldwide-fatality-rate-of-major-virus-outbreaks-in-the-last-50-years/)  
26 [outbreaks-in-the-last-50-years/](https://www.statista.com/statistics/1095129/worldwide-fatality-rate-of-major-virus-outbreaks-in-the-last-50-years/) Accessed 1 May 2020.  
27 15  
28 16  
29 17 68. World Health Organization (WHO). Coronavirus disease (COVID-19) outbreak:  
30 rights, roles and responsibilities of health workers, including key considerations for  
31 occupational safety and health. [https://www.who.int/publications-detail/coronavirus-](https://www.who.int/publications-detail/coronavirus-disease-(covid-19)-outbreak-rights-roles-and-responsibilities-of-health-workers-including-key-considerations-for-occupational-safety-and-health)  
32 [disease-\(covid-19\)-outbreak-rights-roles-and-responsibilities-of-health-workers-](https://www.who.int/publications-detail/coronavirus-disease-(covid-19)-outbreak-rights-roles-and-responsibilities-of-health-workers-including-key-considerations-for-occupational-safety-and-health)  
33 [including-key-considerations-for-occupational-safety-and-health](https://www.who.int/publications-detail/coronavirus-disease-(covid-19)-outbreak-rights-roles-and-responsibilities-of-health-workers-including-key-considerations-for-occupational-safety-and-health). Accessed 24 April  
34 2020  
35 19  
36 20  
37 21  
38 22  
39 23 69. Cook DA, Levinson AJ, Garside S, Dupras DM, Erwin PJ, Montori VM. Internet-  
40 based learning in the health professions: a meta-analysis. *JAMA*. 2008;300(10):1181-  
41 1196.  
42 24  
43 25  
44 26 70. World Health Organization (WHO). Online training as a weapon to fight the new  
45 coronavirus. [https://www.who.int/news-room/detail/07-02-2020-online-training-as-a-](https://www.who.int/news-room/detail/07-02-2020-online-training-as-a-weapon-to-fight-the-new-coronavirus)  
46 [weapon-to-fight-the-new-coronavirus](https://www.who.int/news-room/detail/07-02-2020-online-training-as-a-weapon-to-fight-the-new-coronavirus). Accessed 01 May 2020  
47 28  
48 29 71. McGaghie WC, Issenberg SB, Cohen ER, Barsuk JH, Wayne DB. Does simulation-  
49 based medical education with deliberate practice yield better results than traditional  
50 clinical education? A meta-analytic comparative review of the evidence. *Acad Med*.  
51 2011;86(6):706-711.  
52 30  
53 31  
54 32  
55  
56  
57  
58  
59  
60

- 1  
2  
3 1 72. Motola I, Devine LA, Chung HS, Sullivan JE, Issenberg SB. Simulation in healthcare  
4 education: a best evidence practical guide. AMEE Guide No. 82. *Med Teach*.  
5 2 2013;35(10):e1511-1530.  
6 3  
7 8  
8 4 73. Thomas PA, Kern DE, Hughes MT, Chen BY. *Curriculum development for medical*  
9 education: a six-step approach. JHU Press; 2016.  
10 5  
11 6 74. Bjerrum F, Thomsen ASS, Nayahangan LJ, Konge L. Surgical simulation: Current  
12 7 practices and future perspectives for technical skills training. *Med Teach*.  
13 8 2018;40(7):668-675.  
14 9  
15 9 75. Loignon C, Nouvet E, Couturier F, et al. Barriers to supportive care during the Ebola  
16 10 virus disease outbreak in West Africa: Results of a qualitative study. *PloS one*.  
17 11 2018;13(9).  
18 12  
19 12 76. Norman G. Data dredging, salami-slicing, and other successful strategies to ensure  
20 13 rejection: twelve tips on how to not get your paper published. *Adv health sci educ*.  
21 14 2014;19(1):1-5.  
22 15  
23 15 77. Yudkowsky R, Park YS, Downing SM. *Assessment in health professions education*.  
24 16 Routledge; 2019.  
25 17  
26 17 78. Lockyer J, Carraccio C, Chan M-K, et al. Core principles of assessment in  
27 18 competency-based medical education. *Med teach*. 2017;39(6):609-616.  
28 19  
29 19 79. Alken AP, Fluit C, Luursema J-M, van Goor H. Integrating technical and  
30 20 nontechnical skills in hands-on surgical training. *Medical and Surgical Education:*  
31 21 *Past, Present and Future*. 2018:1.  
32 22  
33 22 80. Ericsson KA, Krampe RT, Tesch-Römer C. The role of deliberate practice in the  
34 23 acquisition of expert performance. *Psychol. Rev*. 1993;100(3):363.  
35 24  
36 24 81. Bordage G, Harris I. Making a difference in curriculum reform and decision-making  
37 25 processes. *Med Educ*. 2011;45(1):87-94.  
38 26  
39 26 82. Van Der Vleuten PMC, Dolmans DHJM, Scherpbier AJJA. The need for evidence in  
40 27 education. *Med Teach*. 2000;22(3):246-250.  
41 28  
42 28  
43 29  
44  
45  
46  
47  
48  
49  
50  
51  
52  
53  
54  
55  
56  
57  
58  
59  
60

1  
2  
3 1 **TABLE AND FIGURE LEGENDS**  
4

5 2 **Figure 1.** Preferred Reporting Items for Systematic Reviews and Meta-Analyses (PRISMA)  
6  
7  
8 3 flowchart of the study search and selection process for a systematic review on training and  
9  
10 4 education of healthcare workers during viral epidemics

11  
12 5 **Table 1:** Inclusion and exclusion criteria for inclusion in a systematic review on training and  
13  
14 6 education of healthcare workers during viral epidemics

15  
16  
17 7 **Table 2:** Search strings used in a systematic review on training and education of healthcare  
18  
19 8 workers during viral epidemics

20  
21 9 **Table 3:** Characteristics of the educational interventional studies included in a systematic  
22  
23 10 review on training and education of healthcare workers during viral epidemics

24  
25  
26 11 ***Supplementary files:***

27  
28 12 **Table S1:** Overview of the educational interventional studies included in a systematic review  
29  
30 13 on training and education of healthcare workers during viral epidemics including general  
31  
32 14 descriptive information  
33  
34  
35  
36  
37  
38  
39  
40  
41  
42  
43  
44  
45  
46  
47  
48  
49  
50  
51  
52  
53  
54  
55  
56  
57  
58  
59  
60

**Table 1.** Inclusion and exclusion criteria for inclusion in a systematic review on training and education of healthcare workers during viral epidemics

| <i>Inclusion criteria</i>                                                                                                                                                                                                                                                                                                                                                                                                                                                                                                                                                                                                                        | <i>Exclusion criteria</i>                                                                                                                                                                                                                                                                                                                                                                                                                                                                                                   |
|--------------------------------------------------------------------------------------------------------------------------------------------------------------------------------------------------------------------------------------------------------------------------------------------------------------------------------------------------------------------------------------------------------------------------------------------------------------------------------------------------------------------------------------------------------------------------------------------------------------------------------------------------|-----------------------------------------------------------------------------------------------------------------------------------------------------------------------------------------------------------------------------------------------------------------------------------------------------------------------------------------------------------------------------------------------------------------------------------------------------------------------------------------------------------------------------|
| <ul style="list-style-type: none"> <li>• Population: Healthcare professionals, healthcare workers and healthcare students at any level.</li> <li>• Intervention: Studies reporting on the development, evaluation and implementation of educational interventions regarding treatment and prevention control.</li> <li>• Comparison: Any studies investigating educational interventions.</li> <li>• Outcomes: Studies with learner outcome measures.</li> <li>• Design: Any quantitative or qualitative interventional study.</li> <li>• Context: Studies conducted in any healthcare or healthcare professions educational setting.</li> </ul> | <ul style="list-style-type: none"> <li>• Studies that were not in English language.</li> <li>• Unpublished literature or not available through online access.</li> <li>• Abstracts with insufficient description, quantitative or qualitative data</li> <li>• Descriptive papers that only describe development of the educational intervention without any evaluation.</li> <li>• Studies reporting on organizational outcomes with no relevance to training nor evaluation of educational or training effects.</li> </ul> |

1 **Table 2:** Search strings used in a systematic review on training and education of healthcare  
 2 workers during viral epidemics

| <p>1<br/>2<br/>3<br/>4<br/>5<br/>6<br/>7<br/>8<br/>9<br/>10<br/>11<br/>12<br/>13<br/>14</p> <p><b>1. PubMed</b></p>                                                                                                                            | <p>(training OR educat* OR teach*) AND (coronavirus OR SARS OR H1N1 OR MERS OR EBOLA OR COVID-19)</p>                                                                                                                                                                                                                                                                                                                                                                                                                                                                                                                                                                                                                                                                                                                                                                                                                                                                                                                                                                                                                                                                                                                                                                                                                                                                                                                       |    |        |    |          |    |         |    |        |    |             |    |      |    |      |    |      |    |       |    |          |     |                |     |                                  |     |             |
|------------------------------------------------------------------------------------------------------------------------------------------------------------------------------------------------------------------------------------------------|-----------------------------------------------------------------------------------------------------------------------------------------------------------------------------------------------------------------------------------------------------------------------------------------------------------------------------------------------------------------------------------------------------------------------------------------------------------------------------------------------------------------------------------------------------------------------------------------------------------------------------------------------------------------------------------------------------------------------------------------------------------------------------------------------------------------------------------------------------------------------------------------------------------------------------------------------------------------------------------------------------------------------------------------------------------------------------------------------------------------------------------------------------------------------------------------------------------------------------------------------------------------------------------------------------------------------------------------------------------------------------------------------------------------------------|----|--------|----|----------|----|---------|----|--------|----|-------------|----|------|----|------|----|------|----|-------|----|----------|-----|----------------|-----|----------------------------------|-----|-------------|
| <p>15<br/>16<br/>17<br/>18<br/>19<br/>20<br/>21<br/>22<br/>23<br/>24<br/>25<br/>26<br/>27<br/>28<br/>29<br/>30<br/>31<br/>32<br/>33<br/>34<br/>35<br/>36<br/>37<br/>38<br/>39<br/>40<br/>41<br/>42<br/>43<br/>44</p> <p><b>1. Cochrane</b></p> | <table border="1"> <thead> <tr> <th data-bbox="676 689 719 719">ID</th> <th data-bbox="794 689 890 719">Search</th> </tr> </thead> <tbody> <tr> <td data-bbox="676 745 711 775">#1</td> <td data-bbox="794 745 951 775">TRAINING</td> </tr> <tr> <td data-bbox="676 801 711 831">#2</td> <td data-bbox="794 801 895 831">educat*</td> </tr> <tr> <td data-bbox="676 857 711 887">#3</td> <td data-bbox="794 857 879 887">teach*</td> </tr> <tr> <td data-bbox="676 913 711 943">#4</td> <td data-bbox="794 913 948 943">coronavirus</td> </tr> <tr> <td data-bbox="676 969 711 999">#5</td> <td data-bbox="794 969 874 999">SARS</td> </tr> <tr> <td data-bbox="676 1025 711 1055">#6</td> <td data-bbox="794 1025 868 1055">H1N1</td> </tr> <tr> <td data-bbox="676 1081 711 1111">#7</td> <td data-bbox="794 1081 879 1111">MERS</td> </tr> <tr> <td data-bbox="676 1137 711 1167">#8</td> <td data-bbox="794 1137 900 1167">EBOLA</td> </tr> <tr> <td data-bbox="676 1193 711 1223">#9</td> <td data-bbox="794 1193 938 1223">COVID-19</td> </tr> <tr> <td data-bbox="676 1249 727 1279">#10</td> <td data-bbox="794 1249 1011 1279">#1 OR #2 OR #3</td> </tr> <tr> <td data-bbox="676 1305 727 1335">#11</td> <td data-bbox="794 1305 1273 1335">#4 OR #5 OR #6 OR #7 or #8 OR #9</td> </tr> <tr> <td data-bbox="676 1361 727 1391">#12</td> <td data-bbox="794 1361 975 1391">#10 AND #11</td> </tr> </tbody> </table> | ID | Search | #1 | TRAINING | #2 | educat* | #3 | teach* | #4 | coronavirus | #5 | SARS | #6 | H1N1 | #7 | MERS | #8 | EBOLA | #9 | COVID-19 | #10 | #1 OR #2 OR #3 | #11 | #4 OR #5 OR #6 OR #7 or #8 OR #9 | #12 | #10 AND #11 |
| ID                                                                                                                                                                                                                                             | Search                                                                                                                                                                                                                                                                                                                                                                                                                                                                                                                                                                                                                                                                                                                                                                                                                                                                                                                                                                                                                                                                                                                                                                                                                                                                                                                                                                                                                      |    |        |    |          |    |         |    |        |    |             |    |      |    |      |    |      |    |       |    |          |     |                |     |                                  |     |             |
| #1                                                                                                                                                                                                                                             | TRAINING                                                                                                                                                                                                                                                                                                                                                                                                                                                                                                                                                                                                                                                                                                                                                                                                                                                                                                                                                                                                                                                                                                                                                                                                                                                                                                                                                                                                                    |    |        |    |          |    |         |    |        |    |             |    |      |    |      |    |      |    |       |    |          |     |                |     |                                  |     |             |
| #2                                                                                                                                                                                                                                             | educat*                                                                                                                                                                                                                                                                                                                                                                                                                                                                                                                                                                                                                                                                                                                                                                                                                                                                                                                                                                                                                                                                                                                                                                                                                                                                                                                                                                                                                     |    |        |    |          |    |         |    |        |    |             |    |      |    |      |    |      |    |       |    |          |     |                |     |                                  |     |             |
| #3                                                                                                                                                                                                                                             | teach*                                                                                                                                                                                                                                                                                                                                                                                                                                                                                                                                                                                                                                                                                                                                                                                                                                                                                                                                                                                                                                                                                                                                                                                                                                                                                                                                                                                                                      |    |        |    |          |    |         |    |        |    |             |    |      |    |      |    |      |    |       |    |          |     |                |     |                                  |     |             |
| #4                                                                                                                                                                                                                                             | coronavirus                                                                                                                                                                                                                                                                                                                                                                                                                                                                                                                                                                                                                                                                                                                                                                                                                                                                                                                                                                                                                                                                                                                                                                                                                                                                                                                                                                                                                 |    |        |    |          |    |         |    |        |    |             |    |      |    |      |    |      |    |       |    |          |     |                |     |                                  |     |             |
| #5                                                                                                                                                                                                                                             | SARS                                                                                                                                                                                                                                                                                                                                                                                                                                                                                                                                                                                                                                                                                                                                                                                                                                                                                                                                                                                                                                                                                                                                                                                                                                                                                                                                                                                                                        |    |        |    |          |    |         |    |        |    |             |    |      |    |      |    |      |    |       |    |          |     |                |     |                                  |     |             |
| #6                                                                                                                                                                                                                                             | H1N1                                                                                                                                                                                                                                                                                                                                                                                                                                                                                                                                                                                                                                                                                                                                                                                                                                                                                                                                                                                                                                                                                                                                                                                                                                                                                                                                                                                                                        |    |        |    |          |    |         |    |        |    |             |    |      |    |      |    |      |    |       |    |          |     |                |     |                                  |     |             |
| #7                                                                                                                                                                                                                                             | MERS                                                                                                                                                                                                                                                                                                                                                                                                                                                                                                                                                                                                                                                                                                                                                                                                                                                                                                                                                                                                                                                                                                                                                                                                                                                                                                                                                                                                                        |    |        |    |          |    |         |    |        |    |             |    |      |    |      |    |      |    |       |    |          |     |                |     |                                  |     |             |
| #8                                                                                                                                                                                                                                             | EBOLA                                                                                                                                                                                                                                                                                                                                                                                                                                                                                                                                                                                                                                                                                                                                                                                                                                                                                                                                                                                                                                                                                                                                                                                                                                                                                                                                                                                                                       |    |        |    |          |    |         |    |        |    |             |    |      |    |      |    |      |    |       |    |          |     |                |     |                                  |     |             |
| #9                                                                                                                                                                                                                                             | COVID-19                                                                                                                                                                                                                                                                                                                                                                                                                                                                                                                                                                                                                                                                                                                                                                                                                                                                                                                                                                                                                                                                                                                                                                                                                                                                                                                                                                                                                    |    |        |    |          |    |         |    |        |    |             |    |      |    |      |    |      |    |       |    |          |     |                |     |                                  |     |             |
| #10                                                                                                                                                                                                                                            | #1 OR #2 OR #3                                                                                                                                                                                                                                                                                                                                                                                                                                                                                                                                                                                                                                                                                                                                                                                                                                                                                                                                                                                                                                                                                                                                                                                                                                                                                                                                                                                                              |    |        |    |          |    |         |    |        |    |             |    |      |    |      |    |      |    |       |    |          |     |                |     |                                  |     |             |
| #11                                                                                                                                                                                                                                            | #4 OR #5 OR #6 OR #7 or #8 OR #9                                                                                                                                                                                                                                                                                                                                                                                                                                                                                                                                                                                                                                                                                                                                                                                                                                                                                                                                                                                                                                                                                                                                                                                                                                                                                                                                                                                            |    |        |    |          |    |         |    |        |    |             |    |      |    |      |    |      |    |       |    |          |     |                |     |                                  |     |             |
| #12                                                                                                                                                                                                                                            | #10 AND #11                                                                                                                                                                                                                                                                                                                                                                                                                                                                                                                                                                                                                                                                                                                                                                                                                                                                                                                                                                                                                                                                                                                                                                                                                                                                                                                                                                                                                 |    |        |    |          |    |         |    |        |    |             |    |      |    |      |    |      |    |       |    |          |     |                |     |                                  |     |             |
| <p>45<br/>46<br/>47<br/>48<br/>49<br/>50<br/>51<br/>52<br/>53<br/>54<br/>55</p> <p><b>2. EMBASE</b></p>                                                                                                                                        | <p>(training OR educat* OR teach*) AND (coronavirus OR sars OR h1n1 OR mers OR ebola OR 'covid 19') AND [2000-2020]/py AND [english]/lim</p>                                                                                                                                                                                                                                                                                                                                                                                                                                                                                                                                                                                                                                                                                                                                                                                                                                                                                                                                                                                                                                                                                                                                                                                                                                                                                |    |        |    |          |    |         |    |        |    |             |    |      |    |      |    |      |    |       |    |          |     |                |     |                                  |     |             |
| <p>56<br/>57<br/>58<br/>59<br/>60</p>                                                                                                                                                                                                          |                                                                                                                                                                                                                                                                                                                                                                                                                                                                                                                                                                                                                                                                                                                                                                                                                                                                                                                                                                                                                                                                                                                                                                                                                                                                                                                                                                                                                             |    |        |    |          |    |         |    |        |    |             |    |      |    |      |    |      |    |       |    |          |     |                |     |                                  |     |             |

|                                 |                                                                                                                                                                                                                                                                                                                                                                                                                                                   |
|---------------------------------|---------------------------------------------------------------------------------------------------------------------------------------------------------------------------------------------------------------------------------------------------------------------------------------------------------------------------------------------------------------------------------------------------------------------------------------------------|
| <p><b>3. Web of Science</b></p> | <p>(training OR educat* OR teach*) AND (coronavirus OR SARS OR H1N1 OR MERS OR EBOLA OR COVID-19)</p>                                                                                                                                                                                                                                                                                                                                             |
|                                 |                                                                                                                                                                                                                                                                                                                                                                                                                                                   |
| <p><b>4. DOAJ</b></p>           | <p>Training AND coronavirus<br/> Training AND SARS<br/> Training AND H1N1<br/> Training AND MERS<br/> Training AND COVID-19<br/> Training AND Ebola<br/> Educat* AND coronavirus<br/> Educat* AND SARS<br/> Educat* AND H1N1<br/> Educat* AND MERS<br/> Educat* AND EBOLA<br/> Educat* AND COVID-19<br/> Teach* AND coronavirus<br/> Teach* AND SARS<br/> Teach* AND H1N1<br/> Teach* AND MERS<br/> Teach* AND EBOLA<br/> Teach* AND COVID-19</p> |

1

2 **Abbreviations:** SARS- severe acute respiratory syndrome; H1N1- H1N1 influenza virus  
3 infection; MERS- Middle East respiratory syndrome; EVD- Ebola virus disease; COVID-19-  
4 corona virus disease 2019; EMBASE- Excerpta Medica; DOAJ- Directory of Open Access  
5 Journals

6

**Table 3.** Characteristics of the educational interventional studies included in a systematic review on training and education of healthcare workers during viral epidemics

| <b>Viral Illness</b>                                               | <b>N<sub>studies</sub></b> | <b>N<sub>studies</sub>(%)</b> |
|--------------------------------------------------------------------|----------------------------|-------------------------------|
| SARS                                                               | 8                          | 17                            |
| H1N1                                                               | 7                          | 15                            |
| MERS                                                               | 1                          | 2                             |
| EVD                                                                | 24                         | 52                            |
| COVID-19                                                           | 3                          | 7                             |
| Multiple illnesses                                                 | 3                          | 7                             |
| <b>Years</b>                                                       |                            |                               |
| 2000–2005                                                          | 1                          | 2                             |
| 2006–2010                                                          | 8                          | 17                            |
| 2011–2015                                                          | 12                         | 26                            |
| 2016–2020                                                          | 25                         | 54                            |
| <b>Competency category</b>                                         |                            |                               |
| Knowledge                                                          | 35                         | 76                            |
| Technical skills                                                   | 26                         | 57                            |
| “Non-technical” skills                                             | 8                          | 17                            |
| <b>Primary educational modality</b>                                |                            |                               |
| Traditional didactics                                              | 13                         | 28                            |
| Simulation-based training                                          | 31                         | 67                            |
| E-learning                                                         | 6                          | 13                            |
| <b>Educational outcome (cf. Kirkpatrick's levels<sup>13</sup>)</b> |                            |                               |
| Level 1                                                            | 8                          | 17                            |
| Level 2a                                                           | 5                          | 11                            |
| Level 2b                                                           | 29                         | 63                            |
| Level 3                                                            | 1                          | 2                             |
| Level 4a                                                           | 1                          | 2                             |



---

Level 4b

---

2

4

1

2 **Abbreviations:** SARS- severe acute respiratory syndrome; H1N1- H1N1 influenza virus  
3 infection; MERS- Middle East respiratory syndrome; EVD- Ebola virus disease; COVID-19-  
4 corona virus disease 2019.

For peer review only

**Figure 1.** Preferred Reporting Items for Systematic Reviews and Meta-Analyses (PRISMA)<sup>11</sup> flowchart of the study search and selection process for a systematic review on training and education of healthcare workers during viral epidemics

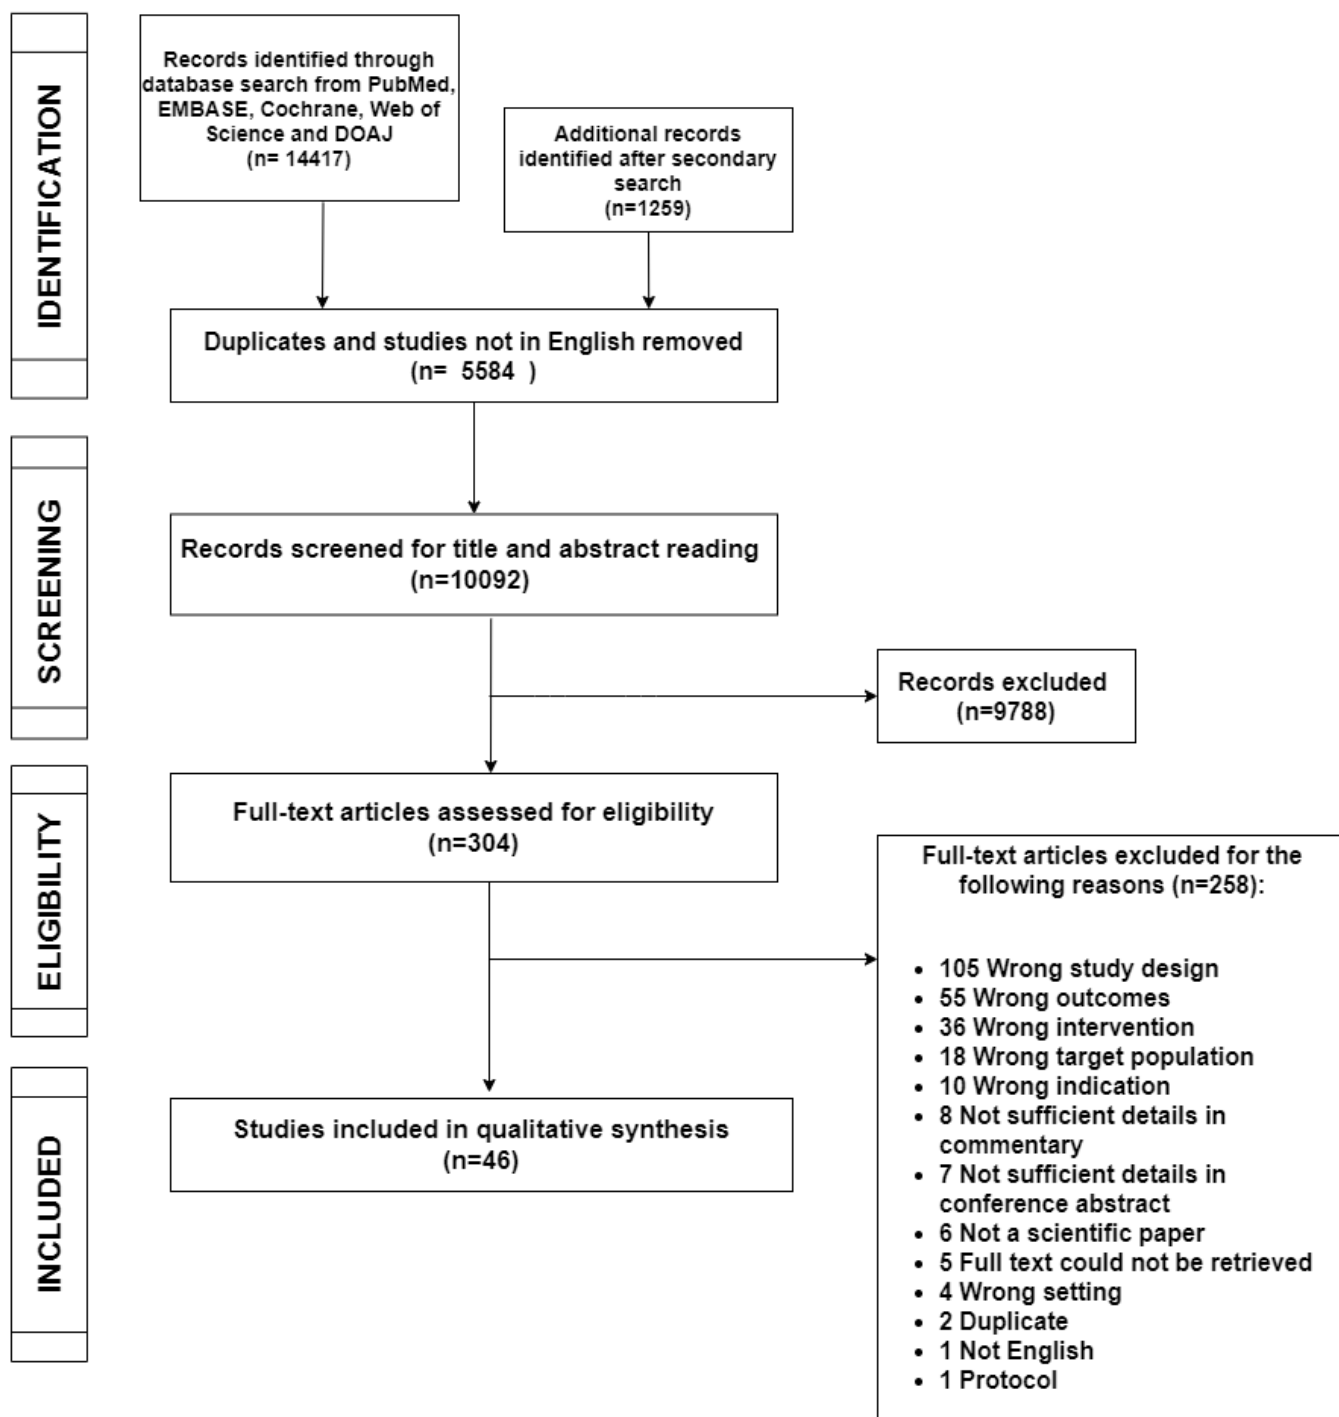

## Supplementary table

**Table S1.** Overview of the educational interventional studies included in a systematic review on training and education of healthcare workers during viral epidemics including general descriptive information

| First author, year of publication | Country of first author | Viral illness | Participants                                                | Competency category and overall educational content                                                     | Delivery                                                  |                                                | Quality Appraisal using the Educational Intervention Checklist <sup>8</sup> (Scoring: 0-2, where 2 is the highest score) |                                 |                                | Kirkpatrick's Levels | Main findings                                                                                                                                                                                                                                                                                                                                                                                                                       |
|-----------------------------------|-------------------------|---------------|-------------------------------------------------------------|---------------------------------------------------------------------------------------------------------|-----------------------------------------------------------|------------------------------------------------|--------------------------------------------------------------------------------------------------------------------------|---------------------------------|--------------------------------|----------------------|-------------------------------------------------------------------------------------------------------------------------------------------------------------------------------------------------------------------------------------------------------------------------------------------------------------------------------------------------------------------------------------------------------------------------------------|
|                                   |                         |               |                                                             |                                                                                                         | Main educational modality                                 | Duration of training                           | Preparation (items 1–2), mean                                                                                            | Intervention (items 3–15), mean | Evaluation (items 16–17), mean |                      |                                                                                                                                                                                                                                                                                                                                                                                                                                     |
| Abrahamson, 2006                  | Canada                  | SARS          | Doctors, nurses                                             | Knowledge and technical skills on advanced cardiac life support protocol for SARS patients              | Simulation-based training (scenario-based)                | 2-hour session                                 | 2.0                                                                                                                      | 1.3                             | 1.5                            | 1                    | Participants rated the comprehensiveness, duration, and effectiveness of teaching methods favorably.                                                                                                                                                                                                                                                                                                                                |
| Abualenain, 2018                  | Saudi Arabia            | EVD           | Doctors, nurses, paramedics, anesthesia technicians, others | Technical skills: donning and doffing of PPE                                                            | Simulation-based training                                 | Not specified                                  | 1.5                                                                                                                      | 1.3                             | 0.5                            | 2b                   | Pre- and post-training test written scores for the participants improved significantly ( $p < 0.01$ ) from 67% (range 57–75%) to 85% (range 81–91%), respectively. All 179 HCW completed the Ebola PPE checklist, about half compromised (different levels of compromising) the PPE protocol at some point.                                                                                                                         |
| Adini, 2012                       | Israel                  | H1N1          | Doctors, nurses                                             | Knowledge and technical skills related to avian flu (management of patient; donning and doffing of PPE) | Lectures; small group discussions and tabletop exercises  | Not specified                                  | 1.5                                                                                                                      | 0.5                             | 0.5                            | 2b                   | The overall mean score for the 14-item multiple choice questions for emergency department medical personnel was 75.6. The correlation between the level of knowledge related to pandemic flu and the performance in the avian flu exercise was not significant (Spearman's rho $< 0.25$ )                                                                                                                                           |
| Aiello, 2011                      | Canada                  | SARS, H1N1    | Doctors, nurses, other hospital staff                       | "Non-technical" skill: resilience                                                                       | Lectures                                                  | Multiple 1-hour sessions over a 5-month period | 1.5                                                                                                                      | 1.1                             | 2.0                            | 1                    | A high proportion of participants found the session relevant to work life and personal life, useful, helpful, and informative. Ten themes emerged from the comments: family-work balance, antiviral prophylaxis, need for information, education and preparedness, ethical concerns, visibility of leadership, valuing frontline staff, mistrust/fears, information relating to redeployment, need for ongoing resilience training. |
| Andonian, 2019                    | USA                     | EVD           | HCW (not specified)                                         | Technical skill: donning and doffing of PPE; "Non-technical" skills: teamwork, cognitive load           | Lectures; video demonstrations, simulation-based training | 2-hour session                                 | 1.5                                                                                                                      | 1.0                             | 0.5                            | 2b                   | Any type of self-contamination was high in both groups (84.6–100 %) during doffing, but the intervention group contaminated fewer sites ( $p = 0.002$ ). Intervention group demonstrated more teamwork behaviors (median 27.1) compared to controls (median 9.1). Participants in the intervention group perceived marginally higher mental demand than the controls ( $p = 0.055$ ).                                               |

|    |                         |             |      |                                                                                                                             |                                                                                   |                                                                                                             |                |     |     |     |    |                                                                                                                                                                                                                                                                                                                                                                                                                                                                                                                                                                 |
|----|-------------------------|-------------|------|-----------------------------------------------------------------------------------------------------------------------------|-----------------------------------------------------------------------------------|-------------------------------------------------------------------------------------------------------------|----------------|-----|-----|-----|----|-----------------------------------------------------------------------------------------------------------------------------------------------------------------------------------------------------------------------------------------------------------------------------------------------------------------------------------------------------------------------------------------------------------------------------------------------------------------------------------------------------------------------------------------------------------------|
| 1  | <b>Bazeyo, 2015</b>     | Uganda      | EVD  | Doctors, nurses and other district HCW including lab technicians, immigration officers and security officers, media persons | Knowledge related to EVD                                                          | Small group work and discussions; demonstrations, visual aids, role play, case studies; practical exercises | 5-day course   | 1.0 | 0.6 | 0.5 | 2b | Knowledge increased from ~56–78 % pre-intervention to ~68–88 % post-intervention on a knowledge test.                                                                                                                                                                                                                                                                                                                                                                                                                                                           |
| 2  |                         |             |      |                                                                                                                             |                                                                                   |                                                                                                             |                |     |     |     |    |                                                                                                                                                                                                                                                                                                                                                                                                                                                                                                                                                                 |
| 3  |                         |             |      |                                                                                                                             |                                                                                   |                                                                                                             |                |     |     |     |    |                                                                                                                                                                                                                                                                                                                                                                                                                                                                                                                                                                 |
| 4  |                         |             |      |                                                                                                                             |                                                                                   |                                                                                                             |                |     |     |     |    |                                                                                                                                                                                                                                                                                                                                                                                                                                                                                                                                                                 |
| 5  |                         |             |      |                                                                                                                             |                                                                                   |                                                                                                             |                |     |     |     |    |                                                                                                                                                                                                                                                                                                                                                                                                                                                                                                                                                                 |
| 6  |                         |             |      |                                                                                                                             |                                                                                   |                                                                                                             |                |     |     |     |    |                                                                                                                                                                                                                                                                                                                                                                                                                                                                                                                                                                 |
| 7  |                         |             |      |                                                                                                                             |                                                                                   |                                                                                                             |                |     |     |     |    |                                                                                                                                                                                                                                                                                                                                                                                                                                                                                                                                                                 |
| 8  |                         |             |      |                                                                                                                             |                                                                                   |                                                                                                             |                |     |     |     |    |                                                                                                                                                                                                                                                                                                                                                                                                                                                                                                                                                                 |
| 9  |                         |             |      |                                                                                                                             |                                                                                   |                                                                                                             |                |     |     |     |    |                                                                                                                                                                                                                                                                                                                                                                                                                                                                                                                                                                 |
| 10 | <b>Bemah, 2019</b>      | Liberia     | EVD  | HCW (not specified)                                                                                                         | Knowledge related to PPC, EVD and IPC                                             | Classroom-based teaching; simulated patients; clinical mentoring                                            | 8-day course   | 1.0 | 1.1 | 0.5 | 4b | Both clinicians (n = 188) and non-clinicians (n = 149) showed statistically significant improvements in knowledge on clinical care and IPC concepts as measured by the 9-item pre- and post-training questionnaires (both p < 0.001). HCW infection rate was 9% by October 2014 (pre-course) and had dropped to 1% by January 2015 (post-course). Furthermore, after the conclusion of training in March 2015, no infections reported among HCW exposed to the confirmed cases despite the resurgence of Ebola cases in June and November 2015, and April 2016. |
| 11 |                         |             |      |                                                                                                                             |                                                                                   |                                                                                                             |                |     |     |     |    |                                                                                                                                                                                                                                                                                                                                                                                                                                                                                                                                                                 |
| 12 |                         |             |      |                                                                                                                             |                                                                                   |                                                                                                             |                |     |     |     |    |                                                                                                                                                                                                                                                                                                                                                                                                                                                                                                                                                                 |
| 13 |                         |             |      |                                                                                                                             |                                                                                   |                                                                                                             |                |     |     |     |    |                                                                                                                                                                                                                                                                                                                                                                                                                                                                                                                                                                 |
| 14 |                         |             |      |                                                                                                                             |                                                                                   |                                                                                                             |                |     |     |     |    |                                                                                                                                                                                                                                                                                                                                                                                                                                                                                                                                                                 |
| 15 |                         |             |      |                                                                                                                             |                                                                                   |                                                                                                             |                |     |     |     |    |                                                                                                                                                                                                                                                                                                                                                                                                                                                                                                                                                                 |
| 16 |                         |             |      |                                                                                                                             |                                                                                   |                                                                                                             |                |     |     |     |    |                                                                                                                                                                                                                                                                                                                                                                                                                                                                                                                                                                 |
| 17 |                         |             |      |                                                                                                                             |                                                                                   |                                                                                                             |                |     |     |     |    |                                                                                                                                                                                                                                                                                                                                                                                                                                                                                                                                                                 |
| 18 |                         |             |      |                                                                                                                             |                                                                                   |                                                                                                             |                |     |     |     |    |                                                                                                                                                                                                                                                                                                                                                                                                                                                                                                                                                                 |
| 19 |                         |             |      |                                                                                                                             |                                                                                   |                                                                                                             |                |     |     |     |    |                                                                                                                                                                                                                                                                                                                                                                                                                                                                                                                                                                 |
| 20 | <b>Brazzi, 2012</b>     | Italy       | H1N1 | Anesthesiologists                                                                                                           | Knowledge: gas exchange during extracorporeal bypass; Technical skill: ECMO       | Lectures; simulation-based training                                                                         | 3-day course   | 1.0 | 1.6 | 2.0 | 1  | Participants rated the relevance, quality and efficacy of the training favorably.                                                                                                                                                                                                                                                                                                                                                                                                                                                                               |
| 21 |                         |             |      |                                                                                                                             |                                                                                   |                                                                                                             |                |     |     |     |    |                                                                                                                                                                                                                                                                                                                                                                                                                                                                                                                                                                 |
| 22 |                         |             |      |                                                                                                                             |                                                                                   |                                                                                                             |                |     |     |     |    |                                                                                                                                                                                                                                                                                                                                                                                                                                                                                                                                                                 |
| 23 |                         |             |      |                                                                                                                             |                                                                                   |                                                                                                             |                |     |     |     |    |                                                                                                                                                                                                                                                                                                                                                                                                                                                                                                                                                                 |
| 24 |                         |             |      |                                                                                                                             |                                                                                   |                                                                                                             |                |     |     |     |    |                                                                                                                                                                                                                                                                                                                                                                                                                                                                                                                                                                 |
| 25 | <b>Bredmose, 2014</b>   | Norway      | EVD  | Helicopter Emergency Medical Service (HEMS) crew                                                                            | Technical skill: Helicopter Emergency Medical Service in relation to EVD patients | Simulation-based training (in-situ simulation)                                                              | Not specified  | 0.5 | 0.7 | 1.0 | 1  | All participants reported high degrees of satisfaction and realism.                                                                                                                                                                                                                                                                                                                                                                                                                                                                                             |
| 26 |                         |             |      |                                                                                                                             |                                                                                   |                                                                                                             |                |     |     |     |    |                                                                                                                                                                                                                                                                                                                                                                                                                                                                                                                                                                 |
| 27 |                         |             |      |                                                                                                                             |                                                                                   |                                                                                                             |                |     |     |     |    |                                                                                                                                                                                                                                                                                                                                                                                                                                                                                                                                                                 |
| 28 |                         |             |      |                                                                                                                             |                                                                                   |                                                                                                             |                |     |     |     |    |                                                                                                                                                                                                                                                                                                                                                                                                                                                                                                                                                                 |
| 29 |                         |             |      |                                                                                                                             |                                                                                   |                                                                                                             |                |     |     |     |    |                                                                                                                                                                                                                                                                                                                                                                                                                                                                                                                                                                 |
| 30 | <b>Bustamente, 2015</b> | USA         | EVD  | Doctors, respiratory therapists                                                                                             | Technical skill: PPE                                                              | Simulation-based training                                                                                   | 4 hours        | 0.5 | 0.8 | 1.0 | 2a | The intervention increased the confidence of participants. 95% and 87% of participants, respectively, rated the program and faculty as good or outstanding on a five-point Likert scale.                                                                                                                                                                                                                                                                                                                                                                        |
| 31 |                         |             |      |                                                                                                                             |                                                                                   |                                                                                                             |                |     |     |     |    |                                                                                                                                                                                                                                                                                                                                                                                                                                                                                                                                                                 |
| 32 |                         |             |      |                                                                                                                             |                                                                                   |                                                                                                             |                |     |     |     |    |                                                                                                                                                                                                                                                                                                                                                                                                                                                                                                                                                                 |
| 33 |                         |             |      |                                                                                                                             |                                                                                   |                                                                                                             |                |     |     |     |    |                                                                                                                                                                                                                                                                                                                                                                                                                                                                                                                                                                 |
| 34 |                         |             |      |                                                                                                                             |                                                                                   |                                                                                                             |                |     |     |     |    |                                                                                                                                                                                                                                                                                                                                                                                                                                                                                                                                                                 |
| 35 | <b>Carlos, 2015</b>     | Philippines | EVD  | Doctors, medical technologists                                                                                              | Knowledge related to EVD                                                          | Lecture and practical hands-on workshop                                                                     | 3-day workshop | 1.0 | 1.5 | 2.0 | 2b | The percentage of participants who correctly answered all 10 questions was 2.8% (8 of 285) and 22.5% (82 to 364) pre- and post the workshop, respectively. The number of questions correctly answered by participants increased from a pre-workshop median of 7 (IQR 6–8; range 3–10) to a post-workshop median of 9 (IQR 8–9; range 4–10) (p < 0.009).                                                                                                                                                                                                         |
| 36 |                         |             |      |                                                                                                                             |                                                                                   |                                                                                                             |                |     |     |     |    |                                                                                                                                                                                                                                                                                                                                                                                                                                                                                                                                                                 |
| 37 |                         |             |      |                                                                                                                             |                                                                                   |                                                                                                             |                |     |     |     |    |                                                                                                                                                                                                                                                                                                                                                                                                                                                                                                                                                                 |
| 38 |                         |             |      |                                                                                                                             |                                                                                   |                                                                                                             |                |     |     |     |    |                                                                                                                                                                                                                                                                                                                                                                                                                                                                                                                                                                 |
| 39 |                         |             |      |                                                                                                                             |                                                                                   |                                                                                                             |                |     |     |     |    |                                                                                                                                                                                                                                                                                                                                                                                                                                                                                                                                                                 |
| 40 |                         |             |      |                                                                                                                             |                                                                                   |                                                                                                             |                |     |     |     |    |                                                                                                                                                                                                                                                                                                                                                                                                                                                                                                                                                                 |
| 41 |                         |             |      |                                                                                                                             |                                                                                   |                                                                                                             |                |     |     |     |    |                                                                                                                                                                                                                                                                                                                                                                                                                                                                                                                                                                 |
| 42 |                         |             |      |                                                                                                                             |                                                                                   |                                                                                                             |                |     |     |     |    |                                                                                                                                                                                                                                                                                                                                                                                                                                                                                                                                                                 |
| 43 |                         |             |      |                                                                                                                             |                                                                                   |                                                                                                             |                |     |     |     |    |                                                                                                                                                                                                                                                                                                                                                                                                                                                                                                                                                                 |
| 44 |                         |             |      |                                                                                                                             |                                                                                   |                                                                                                             |                |     |     |     |    |                                                                                                                                                                                                                                                                                                                                                                                                                                                                                                                                                                 |
| 45 |                         |             |      |                                                                                                                             |                                                                                   |                                                                                                             |                |     |     |     |    |                                                                                                                                                                                                                                                                                                                                                                                                                                                                                                                                                                 |
| 46 |                         |             |      |                                                                                                                             |                                                                                   |                                                                                                             |                |     |     |     |    |                                                                                                                                                                                                                                                                                                                                                                                                                                                                                                                                                                 |

|                                                                  |                       |          |           |                                                                                                |                                                                                                                                                                                                                                                                                   |                                                                        |                                                                                             |     |      |     |    |                                                                                                                                                                                                                                                                                                                                                                                    |
|------------------------------------------------------------------|-----------------------|----------|-----------|------------------------------------------------------------------------------------------------|-----------------------------------------------------------------------------------------------------------------------------------------------------------------------------------------------------------------------------------------------------------------------------------|------------------------------------------------------------------------|---------------------------------------------------------------------------------------------|-----|------|-----|----|------------------------------------------------------------------------------------------------------------------------------------------------------------------------------------------------------------------------------------------------------------------------------------------------------------------------------------------------------------------------------------|
| 1<br>2<br>3<br>4<br>5                                            | <b>Carrico, 2007</b>  | USA      | SARS      | Nurses                                                                                         | Knowledge of respiratory pathogen transmission as well as standard precautions; Technical skill: donning and doffing of PPE                                                                                                                                                       | Classroom training and simulation-based training                       | Not specified, but <1 day                                                                   | 1.0 | 1.6  | 1.0 | 3  | Pre- and post-training test scores were similar for the two groups and increased from 0.64 to 0.76. Participants who received the visual training demonstrated use of PPE more often (74% vs 53%, respectively).                                                                                                                                                                   |
| 6<br>7<br>8<br>9<br>10<br>11<br>12<br>13<br>14<br>15<br>16<br>17 | <b>Carvalho, 2019</b> | Spain    | EVD       | Doctors, nurses, cleaning personnel, nursing assistants, security personnel, stretcher bearers | Knowledge: principles of care and management of infected patient. Technical skill: donning and doffing of PPE, other procedures such as blood extraction, catheter placement, endotracheal intubation, hygiene, stool and vomit, cleaning, emergency situations, patient transfer | Classes and seminars; simulation-based training (full scale scenarios) | 80-h course over 10 days                                                                    | 1.0 | 1.4  | 1.5 | 2a | Participants felt that the course increased their sense of security, predisposition to take care of these patients and confidence in management.                                                                                                                                                                                                                                   |
| 18<br>19<br>20<br>21<br>22<br>23<br>24                           | <b>Casalino, 2015</b> | France   | EVD       | Medical and nursing students                                                                   | Knowledge related to EVD; Technical skill: donning and doffing of PPE                                                                                                                                                                                                             | Classroom lecture; specific skills training                            | 1--hour theoretical session; and a practical session repeated every 72 hours for each group | 1.0 | 1.3  | 1.0 | 2b | In all 4 groups, the frequency and number of total errors and critical errors decreased significantly over the course of the training sessions ( $p < .01$ ). The intervention was associated with a greater reduction in the number of total errors and critical errors ( $p < .0001$ ). The B-PPE intervention groups had the fewest errors and critical errors ( $p < .0001$ ). |
| 25<br>26<br>27<br>28<br>29                                       | <b>Chen, 2009</b>     | Taiwan   | SARS      | Doctors                                                                                        | Technical skills: Advanced Airway Life Support                                                                                                                                                                                                                                    | Lecture; simulation-based training                                     | 2-hour lecture, 4-hour hands-on workshop                                                    | 1.5 | 1.8  | 1.5 | 2b | Residents received higher scores during re-simulation regardless of scoring methods.                                                                                                                                                                                                                                                                                               |
| 30<br>31<br>32<br>33<br>34<br>35                                 | <b>Choi, 2020</b>     | Hongkong | COVI D-19 | Doctors and nurses                                                                             | Technical skills: donning and doffing of PPE, intubation, central venous catheter                                                                                                                                                                                                 | Simulation-based training                                              | 20-30 min simulation and 30-mins debriefing                                                 | 1.0 | 1.08 | 1.0 | 2a | The domains for feedback and discussion included the following key events in chronological order: donning PPE, pre-intubation check, intubation procedure, and doffing PPE. Local guideline changes.                                                                                                                                                                               |

|    |                          |             |           |                                                         |                                                                                        |                                                 |                                                                                                                         |     |      |     |    |                                                                                                                                                                                                                                                                                                                                                                                                                                                                                                                                                                                                            |
|----|--------------------------|-------------|-----------|---------------------------------------------------------|----------------------------------------------------------------------------------------|-------------------------------------------------|-------------------------------------------------------------------------------------------------------------------------|-----|------|-----|----|------------------------------------------------------------------------------------------------------------------------------------------------------------------------------------------------------------------------------------------------------------------------------------------------------------------------------------------------------------------------------------------------------------------------------------------------------------------------------------------------------------------------------------------------------------------------------------------------------------|
| 1  | <b>Christensen, 2020</b> | Denmark     | COVI D-19 | Medical students                                        | Technical skills: donning and doffing of PPE                                           | Demonstration/return demonstration; video-based | 2- to 3-hour training session for control group; intervention group watched videos as many times as they wished at home | 1.0 | 1.25 | 0.5 | 2b | 19 of 21 participants returned for 1-month post-instruction evaluation. In donning, the scores in the instructor group ranged from 67% to 100%, and the scores in the video group ranged from 62% to 100%. The overall mean donning score was 86.5/100; the mean score was 84.8 for the instructor group and 88.0 for the video group. In doffing, the scores in the instructor group ranged from 59% to 96%, and the scores in the video group ranged from 51% to 93%. The overall mean doffing score was 76.4/100; the mean score for the instructor group was 79.1, and it was 73.9 for the video group |
| 2  |                          |             |           |                                                         |                                                                                        |                                                 |                                                                                                                         |     |      |     |    |                                                                                                                                                                                                                                                                                                                                                                                                                                                                                                                                                                                                            |
| 3  |                          |             |           |                                                         |                                                                                        |                                                 |                                                                                                                         |     |      |     |    |                                                                                                                                                                                                                                                                                                                                                                                                                                                                                                                                                                                                            |
| 4  |                          |             |           |                                                         |                                                                                        |                                                 |                                                                                                                         |     |      |     |    |                                                                                                                                                                                                                                                                                                                                                                                                                                                                                                                                                                                                            |
| 5  |                          |             |           |                                                         |                                                                                        |                                                 |                                                                                                                         |     |      |     |    |                                                                                                                                                                                                                                                                                                                                                                                                                                                                                                                                                                                                            |
| 6  |                          |             |           |                                                         |                                                                                        |                                                 |                                                                                                                         |     |      |     |    |                                                                                                                                                                                                                                                                                                                                                                                                                                                                                                                                                                                                            |
| 7  |                          |             |           |                                                         |                                                                                        |                                                 |                                                                                                                         |     |      |     |    |                                                                                                                                                                                                                                                                                                                                                                                                                                                                                                                                                                                                            |
| 8  |                          |             |           |                                                         |                                                                                        |                                                 |                                                                                                                         |     |      |     |    |                                                                                                                                                                                                                                                                                                                                                                                                                                                                                                                                                                                                            |
| 9  |                          |             |           |                                                         |                                                                                        |                                                 |                                                                                                                         |     |      |     |    |                                                                                                                                                                                                                                                                                                                                                                                                                                                                                                                                                                                                            |
| 10 |                          |             |           |                                                         |                                                                                        |                                                 |                                                                                                                         |     |      |     |    |                                                                                                                                                                                                                                                                                                                                                                                                                                                                                                                                                                                                            |
| 11 |                          |             |           |                                                         |                                                                                        |                                                 |                                                                                                                         |     |      |     |    |                                                                                                                                                                                                                                                                                                                                                                                                                                                                                                                                                                                                            |
| 12 | <b>Diaz, 2013</b>        | USA         | H1N1      | Doctors                                                 | Knowledge related to H1N1                                                              | Lecture, interactive group sessions, role play  | 3-day course                                                                                                            | 1.0 | 1.3  | 2.0 | 2b | Critical care knowledge improved significantly from before the training to immediately after (Caribbean site: 58–80%; Indonesia site: 56–75%; p <0.001 for both).                                                                                                                                                                                                                                                                                                                                                                                                                                          |
| 13 |                          |             |           |                                                         |                                                                                        |                                                 |                                                                                                                         |     |      |     |    |                                                                                                                                                                                                                                                                                                                                                                                                                                                                                                                                                                                                            |
| 14 |                          |             |           |                                                         |                                                                                        |                                                 |                                                                                                                         |     |      |     |    |                                                                                                                                                                                                                                                                                                                                                                                                                                                                                                                                                                                                            |
| 15 |                          |             |           |                                                         |                                                                                        |                                                 |                                                                                                                         |     |      |     |    |                                                                                                                                                                                                                                                                                                                                                                                                                                                                                                                                                                                                            |
| 16 |                          |             |           |                                                         |                                                                                        |                                                 |                                                                                                                         |     |      |     |    |                                                                                                                                                                                                                                                                                                                                                                                                                                                                                                                                                                                                            |
| 17 | <b>Diaz, 2018</b>        | Switzerland | H1N1      | Undergraduate students in nursing and health sciences   | Knowledge: Critical care management/(best ICU practices, ARDS, and pregnancy influenza | Lectures; case-based learning                   | 3-day course                                                                                                            | 2.0 | 1.7  | 2.0 | 2b | Test scores improved significantly after training (p < .001) both in pilot and implementation phases; participants rated the learning units as good to very good (mean, 5-point Likert scale: 4.6–4.8).                                                                                                                                                                                                                                                                                                                                                                                                    |
| 18 |                          |             |           |                                                         |                                                                                        |                                                 |                                                                                                                         |     |      |     |    |                                                                                                                                                                                                                                                                                                                                                                                                                                                                                                                                                                                                            |
| 19 |                          |             |           |                                                         |                                                                                        |                                                 |                                                                                                                         |     |      |     |    |                                                                                                                                                                                                                                                                                                                                                                                                                                                                                                                                                                                                            |
| 20 |                          |             |           |                                                         |                                                                                        |                                                 |                                                                                                                         |     |      |     |    |                                                                                                                                                                                                                                                                                                                                                                                                                                                                                                                                                                                                            |
| 21 |                          |             |           |                                                         |                                                                                        |                                                 |                                                                                                                         |     |      |     |    |                                                                                                                                                                                                                                                                                                                                                                                                                                                                                                                                                                                                            |
| 22 | <b>Dube, 2018</b>        | USA         | EVD       | Natural and health science major undergraduate students | Knowledge related to EVD                                                               | Case-based learning                             | Integrated in undergraduate curriculum                                                                                  | 2.0 | 1.3  | 2.0 | 2b | Students improved in relation to theoretical knowledge on all 10 questions (a mix of multiple choice questions, true/false statements and free text responses). Overall score (normalized) improved from ~47%–80%.                                                                                                                                                                                                                                                                                                                                                                                         |
| 23 |                          |             |           |                                                         |                                                                                        |                                                 |                                                                                                                         |     |      |     |    |                                                                                                                                                                                                                                                                                                                                                                                                                                                                                                                                                                                                            |
| 24 |                          |             |           |                                                         |                                                                                        |                                                 |                                                                                                                         |     |      |     |    |                                                                                                                                                                                                                                                                                                                                                                                                                                                                                                                                                                                                            |
| 25 |                          |             |           |                                                         |                                                                                        |                                                 |                                                                                                                         |     |      |     |    |                                                                                                                                                                                                                                                                                                                                                                                                                                                                                                                                                                                                            |
| 26 |                          |             |           |                                                         |                                                                                        |                                                 |                                                                                                                         |     |      |     |    |                                                                                                                                                                                                                                                                                                                                                                                                                                                                                                                                                                                                            |
| 27 | <b>Eardley, 2015</b>     | UK          | EVD       | HCW, university and military staff                      | Knowledge related to EVD                                                               | Lectures; drills                                | 4-day course                                                                                                            | 1.5 | 1.5  | 2.0 | 2b | Factual knowledge increased (a median change on the VAS of 4.0 by all delegates, p<0.001). Change in confidence in teaching increased (median change on the VAS of 5.0 for all delegates, p<0.001).                                                                                                                                                                                                                                                                                                                                                                                                        |
| 28 |                          |             |           |                                                         |                                                                                        |                                                 |                                                                                                                         |     |      |     |    |                                                                                                                                                                                                                                                                                                                                                                                                                                                                                                                                                                                                            |
| 29 |                          |             |           |                                                         |                                                                                        |                                                 |                                                                                                                         |     |      |     |    |                                                                                                                                                                                                                                                                                                                                                                                                                                                                                                                                                                                                            |
| 30 |                          |             |           |                                                         |                                                                                        |                                                 |                                                                                                                         |     |      |     |    |                                                                                                                                                                                                                                                                                                                                                                                                                                                                                                                                                                                                            |
| 31 |                          |             |           |                                                         |                                                                                        |                                                 |                                                                                                                         |     |      |     |    |                                                                                                                                                                                                                                                                                                                                                                                                                                                                                                                                                                                                            |
| 32 |                          |             |           |                                                         |                                                                                        |                                                 |                                                                                                                         |     |      |     |    |                                                                                                                                                                                                                                                                                                                                                                                                                                                                                                                                                                                                            |
| 33 | <b>Eckes, 2016</b>       | USA         | EVD       | Nurses                                                  | Knowledge: Principles of EVD care and PPE; Technical skill: donning and doffing of PPE | Lectures; simulation-based training             | Quarterly course (hours not mentioned)                                                                                  | 1.5 | 1.3  | 1.0 | 1  | Participants completed a return demonstration and written assessment. Further details not provided.                                                                                                                                                                                                                                                                                                                                                                                                                                                                                                        |
| 34 |                          |             |           |                                                         |                                                                                        |                                                 |                                                                                                                         |     |      |     |    |                                                                                                                                                                                                                                                                                                                                                                                                                                                                                                                                                                                                            |
| 35 |                          |             |           |                                                         |                                                                                        |                                                 |                                                                                                                         |     |      |     |    |                                                                                                                                                                                                                                                                                                                                                                                                                                                                                                                                                                                                            |
| 36 |                          |             |           |                                                         |                                                                                        |                                                 |                                                                                                                         |     |      |     |    |                                                                                                                                                                                                                                                                                                                                                                                                                                                                                                                                                                                                            |
| 37 |                          |             |           |                                                         |                                                                                        |                                                 |                                                                                                                         |     |      |     |    |                                                                                                                                                                                                                                                                                                                                                                                                                                                                                                                                                                                                            |
| 38 | <b>Elcin, 2016</b>       | Turkey      | MERS      | Paramedics                                              | Knowledge related to MERS and PPE for healthcare providers                             | Simulation-based training                       | 1-day course with 3 sessions                                                                                            | 1.5 | 1.6  | 2.0 | 2b | 16 of 19 (84%) teams recognized the possibility of MERS as a measure of their awareness in the baseline evaluation. The participating sites lacked PPE, which revealed their baseline level of preparedness for MERS. Certain improvements in donning and doffing PPE were observed in the post-training evaluation.                                                                                                                                                                                                                                                                                       |
| 39 |                          |             |           |                                                         |                                                                                        |                                                 |                                                                                                                         |     |      |     |    |                                                                                                                                                                                                                                                                                                                                                                                                                                                                                                                                                                                                            |
| 40 |                          |             |           |                                                         |                                                                                        |                                                 |                                                                                                                         |     |      |     |    |                                                                                                                                                                                                                                                                                                                                                                                                                                                                                                                                                                                                            |
| 41 |                          |             |           |                                                         |                                                                                        |                                                 |                                                                                                                         |     |      |     |    |                                                                                                                                                                                                                                                                                                                                                                                                                                                                                                                                                                                                            |
| 42 |                          |             |           |                                                         |                                                                                        |                                                 |                                                                                                                         |     |      |     |    |                                                                                                                                                                                                                                                                                                                                                                                                                                                                                                                                                                                                            |

|                                                                 |                           |       |            |                                                                                                                                                                      |                                                                                                                                                                                                          |                                                    |                                                                                                                     |     |     |     |    |                                                                                                                                                                                                                                                                             |
|-----------------------------------------------------------------|---------------------------|-------|------------|----------------------------------------------------------------------------------------------------------------------------------------------------------------------|----------------------------------------------------------------------------------------------------------------------------------------------------------------------------------------------------------|----------------------------------------------------|---------------------------------------------------------------------------------------------------------------------|-----|-----|-----|----|-----------------------------------------------------------------------------------------------------------------------------------------------------------------------------------------------------------------------------------------------------------------------------|
| 1<br>2<br>3<br>4                                                | <b>Ferranti, 2016</b>     | USA   | EVD        | Nurses                                                                                                                                                               | Knowledge related to EVD                                                                                                                                                                                 | E-learning: online PowerPoint slides               | 3-day course                                                                                                        | 1.5 | 1.7 | 0.5 | 2b | Knowledge increased significantly from pre- to post and retention test (75.9 % to 90.7 % and 89.8 %, respectively).                                                                                                                                                         |
| 5<br>6<br>7<br>8<br>9<br>10<br>11<br>12<br>13<br>14<br>15<br>16 | <b>Hanley, 2008</b>       | USA   | SARS, H1N1 | Nurses, respiratory therapy students, general internists, physician assistants, nurse practitioners, non-critical-care nurses veterinarians, and physical therapists | Knowledge and technical skills: Infection control, manual ventilation, mechanical ventilation, airway maintenance, and airway suctioning.                                                                | E-learning: video (DVD); simulation-based training | Just-in-time training (90 mins)                                                                                     | 2.0 | 1.1 | 1.0 | 1  | No detailed information of results from the assessment, however, groups passed based on their cognitive scores to the questions and performance scores during the dry lab competency testing.                                                                               |
| 17<br>18<br>19<br>20<br>21<br>22<br>23<br>24                    | <b>Jones-Konneh, 2017</b> | Japan | EVD        | Nurses, other HCW (not specified)                                                                                                                                    | Knowledge related to EVD; Technical skills on PPE and other IPC skills such as hand hygiene, mixing of chlorine solutions, etc.                                                                          | Simulation-based-training                          | 3 phases of training: A. 3 days theory, 2 days for SBT; B. 1-day theory and 2 days SBT; C. 3 days for basic IPC/PPE | 2.0 | 1.3 | 1.0 | 2a | Feeling of comfort decreased anxiety during patient care; no other quantification of training outcome presented. It is speculated that HCWs had improved understanding of EVD, IPC and patient care, which subsequently could have contributed to the survival of patients. |
| 25<br>26<br>27<br>28<br>29<br>30<br>31<br>32<br>33<br>34        | <b>Kim, 2018</b>          | Korea | H1N1       | Doctors, nurses                                                                                                                                                      | Knowledge: basic hemodynamics, ECMO physiology, circuit anatomy, and hemostasis of patients on ECMO; Technical and behavioral skills to manage ECMO scenarios; "Nontechnical" skills: team communication | Lectures; simulation-based training                | Every month (duration not mentioned)                                                                                | 1.5 | 1.2 | 0.5 | 4b | Mortality rate of patients markedly lower during period 2 (after program implementation) as compared to period 1 (before implementation).                                                                                                                                   |

|    |                       |        |                 |                                                           |                                                                                                                                |                                                                                                   |                                                        |     |     |     |    |                                                                                                                                                                                                                                                                                                                                                                                                                                       |
|----|-----------------------|--------|-----------------|-----------------------------------------------------------|--------------------------------------------------------------------------------------------------------------------------------|---------------------------------------------------------------------------------------------------|--------------------------------------------------------|-----|-----|-----|----|---------------------------------------------------------------------------------------------------------------------------------------------------------------------------------------------------------------------------------------------------------------------------------------------------------------------------------------------------------------------------------------------------------------------------------------|
| 1  | <b>Klomp, 2020</b>    | USA    | EVD             | CDC staff (non-clinical deployers)                        | "Nontechnical skills": resilience                                                                                              | Traditional didactics                                                                             | 3-day training                                         | 1.5 | 1.3 | 0.5 | 2b | Pre- to post training knowledge in relation to key elements and resilience increased 2.95 points out of 30 (95% CI, 2.53-3.37). The Self-Efficacy Survey total score showed a significant improvement in overall self-efficacy. This suggests participants gained useful knowledge of resilience principles and strategies.                                                                                                           |
| 2  |                       |        |                 |                                                           |                                                                                                                                |                                                                                                   |                                                        |     |     |     |    |                                                                                                                                                                                                                                                                                                                                                                                                                                       |
| 3  |                       |        |                 |                                                           |                                                                                                                                |                                                                                                   |                                                        |     |     |     |    |                                                                                                                                                                                                                                                                                                                                                                                                                                       |
| 4  |                       |        |                 |                                                           |                                                                                                                                |                                                                                                   |                                                        |     |     |     |    |                                                                                                                                                                                                                                                                                                                                                                                                                                       |
| 5  |                       |        |                 |                                                           |                                                                                                                                |                                                                                                   |                                                        |     |     |     |    |                                                                                                                                                                                                                                                                                                                                                                                                                                       |
| 6  |                       |        |                 |                                                           |                                                                                                                                |                                                                                                   |                                                        |     |     |     |    |                                                                                                                                                                                                                                                                                                                                                                                                                                       |
| 7  |                       |        |                 |                                                           |                                                                                                                                |                                                                                                   |                                                        |     |     |     |    |                                                                                                                                                                                                                                                                                                                                                                                                                                       |
| 8  |                       |        |                 |                                                           |                                                                                                                                |                                                                                                   |                                                        |     |     |     |    |                                                                                                                                                                                                                                                                                                                                                                                                                                       |
| 9  | <b>Lin, 2008</b>      | Taiwan | SARS            | Patient-hired attendants and outsourced workers           | Knowledge: control of nosocomial infections                                                                                    | Lecture; video-based demonstration (CD)                                                           | 2-hour session                                         | 1.0 | 1.0 | 1.0 | 2b | Improvement from 88.5 to 91.4 points from pre to post-training on a knowledge test (p < .001).                                                                                                                                                                                                                                                                                                                                        |
| 10 |                       |        |                 |                                                           |                                                                                                                                |                                                                                                   |                                                        |     |     |     |    |                                                                                                                                                                                                                                                                                                                                                                                                                                       |
| 11 |                       |        |                 |                                                           |                                                                                                                                |                                                                                                   |                                                        |     |     |     |    |                                                                                                                                                                                                                                                                                                                                                                                                                                       |
| 12 |                       |        |                 |                                                           |                                                                                                                                |                                                                                                   |                                                        |     |     |     |    |                                                                                                                                                                                                                                                                                                                                                                                                                                       |
| 13 |                       |        |                 |                                                           |                                                                                                                                |                                                                                                   |                                                        |     |     |     |    |                                                                                                                                                                                                                                                                                                                                                                                                                                       |
| 14 | <b>Marshall, 2008</b> | USA    | SARS            | Nurses, social workers and student, public health student | Knowledge: Bioterrorism preparedness                                                                                           | Problem-based learning                                                                            | 3-hour session; follow-up session 1 week later         | 1.5 | 1.6 | 2.0 | 2b | Increase in knowledge of bioevent preparedness (pre- and post-training knowledge test: overall mean score: 2.4 to 3.8, respectively). Participants found that the case is realistic (mean = 4.1), all health perspectives addressed (mean=3.8), that they had actively participated (mean = 4.6) and gave an overall review (8.5, based on 1-10 scale).                                                                               |
| 15 |                       |        |                 |                                                           |                                                                                                                                |                                                                                                   |                                                        |     |     |     |    |                                                                                                                                                                                                                                                                                                                                                                                                                                       |
| 16 |                       |        |                 |                                                           |                                                                                                                                |                                                                                                   |                                                        |     |     |     |    |                                                                                                                                                                                                                                                                                                                                                                                                                                       |
| 17 |                       |        |                 |                                                           |                                                                                                                                |                                                                                                   |                                                        |     |     |     |    |                                                                                                                                                                                                                                                                                                                                                                                                                                       |
| 18 |                       |        |                 |                                                           |                                                                                                                                |                                                                                                   |                                                        |     |     |     |    |                                                                                                                                                                                                                                                                                                                                                                                                                                       |
| 19 |                       |        |                 |                                                           |                                                                                                                                |                                                                                                   |                                                        |     |     |     |    |                                                                                                                                                                                                                                                                                                                                                                                                                                       |
| 20 | <b>Mathias, 2015</b>  | USA    | SARS, EVD, H1N1 | Pharmacists                                               | Knowledge related to EVD; roles pharmacists play as health care professionals; "Non-technical" skill: critical thinking skills | Learner-led discussions and presentations                                                         | 3-hour/week, offered over two consecutive years        | 2.0 | 1.8 | 2.0 | 2b | Evaluation of knowledge and critical thinking skills, as well as performance within the group: assessment based on preparedness and participation in discussions, oral presentations, research paper and final examination. Overall grades for all categories: Cohort 1 from year 1 (14 learners) = all received a final grade of A; Cohort 2 from the following year (year 2) (16 learners) = final grade A (n=10), B (n=5), C (n=1) |
| 21 |                       |        |                 |                                                           |                                                                                                                                |                                                                                                   |                                                        |     |     |     |    |                                                                                                                                                                                                                                                                                                                                                                                                                                       |
| 22 |                       |        |                 |                                                           |                                                                                                                                |                                                                                                   |                                                        |     |     |     |    |                                                                                                                                                                                                                                                                                                                                                                                                                                       |
| 23 |                       |        |                 |                                                           |                                                                                                                                |                                                                                                   |                                                        |     |     |     |    |                                                                                                                                                                                                                                                                                                                                                                                                                                       |
| 24 |                       |        |                 |                                                           |                                                                                                                                |                                                                                                   |                                                        |     |     |     |    |                                                                                                                                                                                                                                                                                                                                                                                                                                       |
| 25 |                       |        |                 |                                                           |                                                                                                                                |                                                                                                   |                                                        |     |     |     |    |                                                                                                                                                                                                                                                                                                                                                                                                                                       |
| 26 |                       |        |                 |                                                           |                                                                                                                                |                                                                                                   |                                                        |     |     |     |    |                                                                                                                                                                                                                                                                                                                                                                                                                                       |
| 27 |                       |        |                 |                                                           |                                                                                                                                |                                                                                                   |                                                        |     |     |     |    |                                                                                                                                                                                                                                                                                                                                                                                                                                       |
| 28 |                       |        |                 |                                                           |                                                                                                                                |                                                                                                   |                                                        |     |     |     |    |                                                                                                                                                                                                                                                                                                                                                                                                                                       |
| 29 |                       |        |                 |                                                           |                                                                                                                                |                                                                                                   |                                                        |     |     |     |    |                                                                                                                                                                                                                                                                                                                                                                                                                                       |
| 30 | <b>Maunder, 2010</b>  | Canada | H1N1            | Nurses, other HCW (not specified)                         | "Non-technical" skill: Resilience                                                                                              | E-learning: Course materials on a flash drive for self-learning and audio and video mini lectures | 3 course lengths (short/medium/long): 7/12/17 sessions | 2.0 | 1.9 | 1.5 | 2b | Intention-to-treat analysis showed significant improvements in confidence in support and training, pandemic self-efficacy and interpersonal problems. Participants who under-utilized coping via problem-solving or seeking support or over-utilized escape-avoidance have experienced improved coping. Comparison of doses showed improved interpersonal problems in the medium and long course but not in the short course          |
| 31 |                       |        |                 |                                                           |                                                                                                                                |                                                                                                   |                                                        |     |     |     |    |                                                                                                                                                                                                                                                                                                                                                                                                                                       |
| 32 |                       |        |                 |                                                           |                                                                                                                                |                                                                                                   |                                                        |     |     |     |    |                                                                                                                                                                                                                                                                                                                                                                                                                                       |
| 33 |                       |        |                 |                                                           |                                                                                                                                |                                                                                                   |                                                        |     |     |     |    |                                                                                                                                                                                                                                                                                                                                                                                                                                       |
| 34 |                       |        |                 |                                                           |                                                                                                                                |                                                                                                   |                                                        |     |     |     |    |                                                                                                                                                                                                                                                                                                                                                                                                                                       |
| 35 |                       |        |                 |                                                           |                                                                                                                                |                                                                                                   |                                                        |     |     |     |    |                                                                                                                                                                                                                                                                                                                                                                                                                                       |
| 36 |                       |        |                 |                                                           |                                                                                                                                |                                                                                                   |                                                        |     |     |     |    |                                                                                                                                                                                                                                                                                                                                                                                                                                       |
| 37 |                       |        |                 |                                                           |                                                                                                                                |                                                                                                   |                                                        |     |     |     |    |                                                                                                                                                                                                                                                                                                                                                                                                                                       |
| 38 |                       |        |                 |                                                           |                                                                                                                                |                                                                                                   |                                                        |     |     |     |    |                                                                                                                                                                                                                                                                                                                                                                                                                                       |
| 39 |                       |        |                 |                                                           |                                                                                                                                |                                                                                                   |                                                        |     |     |     |    |                                                                                                                                                                                                                                                                                                                                                                                                                                       |
| 40 |                       |        |                 |                                                           |                                                                                                                                |                                                                                                   |                                                        |     |     |     |    |                                                                                                                                                                                                                                                                                                                                                                                                                                       |
| 41 |                       |        |                 |                                                           |                                                                                                                                |                                                                                                   |                                                        |     |     |     |    |                                                                                                                                                                                                                                                                                                                                                                                                                                       |
| 42 |                       |        |                 |                                                           |                                                                                                                                |                                                                                                   |                                                        |     |     |     |    |                                                                                                                                                                                                                                                                                                                                                                                                                                       |
| 43 |                       |        |                 |                                                           |                                                                                                                                |                                                                                                   |                                                        |     |     |     |    |                                                                                                                                                                                                                                                                                                                                                                                                                                       |
| 44 |                       |        |                 |                                                           |                                                                                                                                |                                                                                                   |                                                        |     |     |     |    |                                                                                                                                                                                                                                                                                                                                                                                                                                       |
| 45 |                       |        |                 |                                                           |                                                                                                                                |                                                                                                   |                                                        |     |     |     |    |                                                                                                                                                                                                                                                                                                                                                                                                                                       |
| 46 |                       |        |                 |                                                           |                                                                                                                                |                                                                                                   |                                                        |     |     |     |    |                                                                                                                                                                                                                                                                                                                                                                                                                                       |



|    |                           |         |      |                                                                                                                         |                                                                                                                                                                                  |                                                                                                  |                                              |     |     |     |    |                                                                                                                                                                                                                                                                                                                                                                          |
|----|---------------------------|---------|------|-------------------------------------------------------------------------------------------------------------------------|----------------------------------------------------------------------------------------------------------------------------------------------------------------------------------|--------------------------------------------------------------------------------------------------|----------------------------------------------|-----|-----|-----|----|--------------------------------------------------------------------------------------------------------------------------------------------------------------------------------------------------------------------------------------------------------------------------------------------------------------------------------------------------------------------------|
| 1  | <b>Mc Kenna, 2019</b>     | Belgium | EVD  | Community HCW                                                                                                           | Knowledge related to EVD                                                                                                                                                         | E-learning: mobile training platform                                                             | Multiple modules, each approx. 5 minutes     | 1.5 | 1.5 | 2.0 | 2b | For module II (relevant to the disease), there was an increase of 3 % in CHCWs correctly answering >80 % of the questions. For CHCWs with 50-79 % correct answers there was a regression in performance after training.                                                                                                                                                  |
| 2  |                           |         |      |                                                                                                                         |                                                                                                                                                                                  |                                                                                                  |                                              |     |     |     |    |                                                                                                                                                                                                                                                                                                                                                                          |
| 3  |                           |         |      |                                                                                                                         |                                                                                                                                                                                  |                                                                                                  |                                              |     |     |     |    |                                                                                                                                                                                                                                                                                                                                                                          |
| 4  |                           |         |      |                                                                                                                         |                                                                                                                                                                                  |                                                                                                  |                                              |     |     |     |    |                                                                                                                                                                                                                                                                                                                                                                          |
| 5  | <b>McInnes, 2005</b>      | Canada  | SARS | Security guards, volunteer students                                                                                     | Knowledge related to SARS; Technical skills: handwashing, putting on N-95; temperature taking; "Non-technical" skills: reporting, interpersonal skills, accurate decision making | Lectures; demonstrations and role playing                                                        | Education day (number of hours not detailed) | 1.5 | 1.2 | 0.5 | 1  | The training enabled the trainees to problem solve, think critically, and use the guidelines established by the screening tool to make decisions about individuals trying to enter the hospital. It also enabled them to realize the importance of their interpersonal skills through mock interactions with different people in a variety of circumstances.             |
| 6  |                           |         |      |                                                                                                                         |                                                                                                                                                                                  |                                                                                                  |                                              |     |     |     |    |                                                                                                                                                                                                                                                                                                                                                                          |
| 7  |                           |         |      |                                                                                                                         |                                                                                                                                                                                  |                                                                                                  |                                              |     |     |     |    |                                                                                                                                                                                                                                                                                                                                                                          |
| 8  |                           |         |      |                                                                                                                         |                                                                                                                                                                                  |                                                                                                  |                                              |     |     |     |    |                                                                                                                                                                                                                                                                                                                                                                          |
| 9  |                           |         |      |                                                                                                                         |                                                                                                                                                                                  |                                                                                                  |                                              |     |     |     |    |                                                                                                                                                                                                                                                                                                                                                                          |
| 10 |                           |         |      |                                                                                                                         |                                                                                                                                                                                  |                                                                                                  |                                              |     |     |     |    |                                                                                                                                                                                                                                                                                                                                                                          |
| 11 |                           |         |      |                                                                                                                         |                                                                                                                                                                                  |                                                                                                  |                                              |     |     |     |    |                                                                                                                                                                                                                                                                                                                                                                          |
| 12 |                           |         |      |                                                                                                                         |                                                                                                                                                                                  |                                                                                                  |                                              |     |     |     |    |                                                                                                                                                                                                                                                                                                                                                                          |
| 13 | <b>MenkinSmit h, 2018</b> | USA     | EVD  | Medical fellows and residents, nursing specialty training, others (students)                                            | Knowledge safety measures in Ebola patient care; Technical skills in donning and doffing of PPE, infection control practices                                                     | E-learning: information via online software; Simulation-based training (team training scenarios) | 3-day course                                 | 1.5 | 1.8 | 2.0 | 2b | Both groups demonstrated a significant increase in their knowledge test scores after completing the online curriculum, with average scores for novices increasing from 19.7 to 24.3 (n = 9, p < 0.01) and average score in experienced participants increasing from 19.2 to 22.3 (n = 9, p = 0.03). Overall high performance of both groups in the simulation scenarios. |
| 14 |                           |         |      |                                                                                                                         |                                                                                                                                                                                  |                                                                                                  |                                              |     |     |     |    |                                                                                                                                                                                                                                                                                                                                                                          |
| 15 |                           |         |      |                                                                                                                         |                                                                                                                                                                                  |                                                                                                  |                                              |     |     |     |    |                                                                                                                                                                                                                                                                                                                                                                          |
| 16 |                           |         |      |                                                                                                                         |                                                                                                                                                                                  |                                                                                                  |                                              |     |     |     |    |                                                                                                                                                                                                                                                                                                                                                                          |
| 17 |                           |         |      |                                                                                                                         |                                                                                                                                                                                  |                                                                                                  |                                              |     |     |     |    |                                                                                                                                                                                                                                                                                                                                                                          |
| 18 |                           |         |      |                                                                                                                         |                                                                                                                                                                                  |                                                                                                  |                                              |     |     |     |    |                                                                                                                                                                                                                                                                                                                                                                          |
| 19 |                           |         |      |                                                                                                                         |                                                                                                                                                                                  |                                                                                                  |                                              |     |     |     |    |                                                                                                                                                                                                                                                                                                                                                                          |
| 20 | <b>Narra, 2016</b>        | USA     | EVD  | HCW                                                                                                                     | Knowledge related to EVD, infection prevention and control; Technical skill: donning and doffing of PPE                                                                          | Lectures; small-group discussions, and practical exercises                                       | 3-day course                                 | 2.0 | 1.8 | 2.0 | 1  | This course quickly increased the number of clinicians who could provide care in West Africa ETUs, showing the feasibility of rapidly developing and implementing training in response to a public health emergency.                                                                                                                                                     |
| 21 |                           |         |      |                                                                                                                         |                                                                                                                                                                                  |                                                                                                  |                                              |     |     |     |    |                                                                                                                                                                                                                                                                                                                                                                          |
| 22 |                           |         |      |                                                                                                                         |                                                                                                                                                                                  |                                                                                                  |                                              |     |     |     |    |                                                                                                                                                                                                                                                                                                                                                                          |
| 23 |                           |         |      |                                                                                                                         |                                                                                                                                                                                  |                                                                                                  |                                              |     |     |     |    |                                                                                                                                                                                                                                                                                                                                                                          |
| 24 |                           |         |      |                                                                                                                         |                                                                                                                                                                                  |                                                                                                  |                                              |     |     |     |    |                                                                                                                                                                                                                                                                                                                                                                          |
| 25 | <b>O'Keeffe, 2016</b>     | Ireland | EVD  | Nurses, respiratory therapists, laboratory technicians, and ancillary staff                                             | Knowledge related to EVD and safety management; Technical skills: donning and doffing of PPE, airway management, dressing care and IV infusion, urinary catheter care            | Simulation-based training (interprofessional)                                                    | 4-hour program                               | 2.0 | 1.7 | 2.0 | 2b | Increased level of confidence in three key areas: Contamination breach (pre: 2.17; post: 3.71; p<.001), clinical skills in PPE (pre: 2.04; post: 3.82; p<.001), donning and doffing PPE (pre: 2.04; post: 3.88; p<.001).                                                                                                                                                 |
| 26 |                           |         |      |                                                                                                                         |                                                                                                                                                                                  |                                                                                                  |                                              |     |     |     |    |                                                                                                                                                                                                                                                                                                                                                                          |
| 27 |                           |         |      |                                                                                                                         |                                                                                                                                                                                  |                                                                                                  |                                              |     |     |     |    |                                                                                                                                                                                                                                                                                                                                                                          |
| 28 |                           |         |      |                                                                                                                         |                                                                                                                                                                                  |                                                                                                  |                                              |     |     |     |    |                                                                                                                                                                                                                                                                                                                                                                          |
| 29 |                           |         |      |                                                                                                                         |                                                                                                                                                                                  |                                                                                                  |                                              |     |     |     |    |                                                                                                                                                                                                                                                                                                                                                                          |
| 30 |                           |         |      |                                                                                                                         |                                                                                                                                                                                  |                                                                                                  |                                              |     |     |     |    |                                                                                                                                                                                                                                                                                                                                                                          |
| 31 |                           |         |      |                                                                                                                         |                                                                                                                                                                                  |                                                                                                  |                                              |     |     |     |    |                                                                                                                                                                                                                                                                                                                                                                          |
| 32 | <b>Otu, 2016</b>          | Nigeria | EVD  | Nurses, community HCW, midwives, laboratory scientists, auxiliary nurses, pharmacy technicians and health record staff. | Knowledge on EVD disease specific information; "Non-technical" skill: attitude                                                                                                   | E-learning: tablet computers with Ebola awareness tutorial (EAT)                                 | 2 weeks allowed to review training materials | 1.5 | 1.5 | 1.0 | 2b | Increased in knowledge pre- and post-intervention (61.2 to 68.2, 11% improvement < 0.05); Fear of EVD reduced significantly from 89 to 52%. Positive attitudes between pre- and post-EAT scores regarding contact with EVD patients: (83 to 92%); eating bush meat (57 to 64%) and risky burial practices (67 to 79%),                                                   |
| 33 |                           |         |      |                                                                                                                         |                                                                                                                                                                                  |                                                                                                  |                                              |     |     |     |    |                                                                                                                                                                                                                                                                                                                                                                          |
| 34 |                           |         |      |                                                                                                                         |                                                                                                                                                                                  |                                                                                                  |                                              |     |     |     |    |                                                                                                                                                                                                                                                                                                                                                                          |
| 35 |                           |         |      |                                                                                                                         |                                                                                                                                                                                  |                                                                                                  |                                              |     |     |     |    |                                                                                                                                                                                                                                                                                                                                                                          |
| 36 |                           |         |      |                                                                                                                         |                                                                                                                                                                                  |                                                                                                  |                                              |     |     |     |    |                                                                                                                                                                                                                                                                                                                                                                          |
| 37 |                           |         |      |                                                                                                                         |                                                                                                                                                                                  |                                                                                                  |                                              |     |     |     |    |                                                                                                                                                                                                                                                                                                                                                                          |
| 38 |                           |         |      |                                                                                                                         |                                                                                                                                                                                  |                                                                                                  |                                              |     |     |     |    |                                                                                                                                                                                                                                                                                                                                                                          |
| 39 |                           |         |      |                                                                                                                         |                                                                                                                                                                                  |                                                                                                  |                                              |     |     |     |    |                                                                                                                                                                                                                                                                                                                                                                          |
| 40 |                           |         |      |                                                                                                                         |                                                                                                                                                                                  |                                                                                                  |                                              |     |     |     |    |                                                                                                                                                                                                                                                                                                                                                                          |
| 41 |                           |         |      |                                                                                                                         |                                                                                                                                                                                  |                                                                                                  |                                              |     |     |     |    |                                                                                                                                                                                                                                                                                                                                                                          |
| 42 |                           |         |      |                                                                                                                         |                                                                                                                                                                                  |                                                                                                  |                                              |     |     |     |    |                                                                                                                                                                                                                                                                                                                                                                          |
| 43 |                           |         |      |                                                                                                                         |                                                                                                                                                                                  |                                                                                                  |                                              |     |     |     |    |                                                                                                                                                                                                                                                                                                                                                                          |
| 44 |                           |         |      |                                                                                                                         |                                                                                                                                                                                  |                                                                                                  |                                              |     |     |     |    |                                                                                                                                                                                                                                                                                                                                                                          |
| 45 |                           |         |      |                                                                                                                         |                                                                                                                                                                                  |                                                                                                  |                                              |     |     |     |    |                                                                                                                                                                                                                                                                                                                                                                          |
| 46 |                           |         |      |                                                                                                                         |                                                                                                                                                                                  |                                                                                                  |                                              |     |     |     |    |                                                                                                                                                                                                                                                                                                                                                                          |

|    |                         |             |      |                                                                                                                                                                                                                          |                                                                                                                                                                                                                                                                   |                                                                             |                                                      |     |     |     |    |                                                                                                                                                                                                                                                                                                                                                                                                                                                                                                                                                         |
|----|-------------------------|-------------|------|--------------------------------------------------------------------------------------------------------------------------------------------------------------------------------------------------------------------------|-------------------------------------------------------------------------------------------------------------------------------------------------------------------------------------------------------------------------------------------------------------------|-----------------------------------------------------------------------------|------------------------------------------------------|-----|-----|-----|----|---------------------------------------------------------------------------------------------------------------------------------------------------------------------------------------------------------------------------------------------------------------------------------------------------------------------------------------------------------------------------------------------------------------------------------------------------------------------------------------------------------------------------------------------------------|
| 1  | <b>Phrampus, 2016</b>   | USA         | EVD  | Doctors, nurses, other response team members                                                                                                                                                                             | Knowledge on Ebola, principles of PPE, response, equipment, personal safety, policies; Technical skills: donning and doffing of PPE;                                                                                                                              | Onsite and online pre-course modules; simulation-based training             | 4-hour sessions 4 days/week for 3 weeks              | 2.0 | 1.8 | 2.0 | 2a | Post-course evaluation using an 18-item tool= Median score for each item ranged from 8 to 9 (on a 9-point Likert scale), with interquartile range of 7-9 in all items                                                                                                                                                                                                                                                                                                                                                                                   |
| 2  |                         |             |      |                                                                                                                                                                                                                          |                                                                                                                                                                                                                                                                   |                                                                             |                                                      |     |     |     |    |                                                                                                                                                                                                                                                                                                                                                                                                                                                                                                                                                         |
| 3  |                         |             |      |                                                                                                                                                                                                                          |                                                                                                                                                                                                                                                                   |                                                                             |                                                      |     |     |     |    |                                                                                                                                                                                                                                                                                                                                                                                                                                                                                                                                                         |
| 4  |                         |             |      |                                                                                                                                                                                                                          |                                                                                                                                                                                                                                                                   |                                                                             |                                                      |     |     |     |    |                                                                                                                                                                                                                                                                                                                                                                                                                                                                                                                                                         |
| 5  |                         |             |      |                                                                                                                                                                                                                          |                                                                                                                                                                                                                                                                   |                                                                             |                                                      |     |     |     |    |                                                                                                                                                                                                                                                                                                                                                                                                                                                                                                                                                         |
| 6  | <b>Rehman, 2020</b>     | Pakistan    | EVD  | Nurses                                                                                                                                                                                                                   | Knowledge: EVD awareness                                                                                                                                                                                                                                          | Lectures; video demonstration and discussion                                | 3-hour session                                       | 1.0 | 0.9 | 0.5 | 2b | Pre- and post-training test scores demonstrated improvement in knowledge. The mean baseline knowledge score was 3.93±2.519 while the intervention mean score was 13.18±1.192; difference was significant (p<0.05)                                                                                                                                                                                                                                                                                                                                       |
| 7  |                         |             |      |                                                                                                                                                                                                                          |                                                                                                                                                                                                                                                                   |                                                                             |                                                      |     |     |     |    |                                                                                                                                                                                                                                                                                                                                                                                                                                                                                                                                                         |
| 8  |                         |             |      |                                                                                                                                                                                                                          |                                                                                                                                                                                                                                                                   |                                                                             |                                                      |     |     |     |    |                                                                                                                                                                                                                                                                                                                                                                                                                                                                                                                                                         |
| 9  |                         |             |      |                                                                                                                                                                                                                          |                                                                                                                                                                                                                                                                   |                                                                             |                                                      |     |     |     |    |                                                                                                                                                                                                                                                                                                                                                                                                                                                                                                                                                         |
| 10 | <b>Rogers, 2019</b>     | USA         | SARS | Nurses, respiratory therapists, certified nursing assistants, industrial hygienists, safety and occupational health professionals, infection preventionists , and others identified with respiratory protection practice | Knowledge: Respiratory protection practice such as infectious agent transmission routes, hand hygiene, hazard assessment, respirator selection and care, medical evaluation and monitoring, fit-testing and training, respirator donning/doffing and seal checks. | Educational program (lecture) Clinical observations, focus group interviews | Educational program: 1-day training                  | 2.0 | 1.5 | 1.5 | 4a | In the educational program, 17 (68%) participants received either a higher or perfect score on the post-training test. Observations of HCW: 216 documented incident observations of individuals and worker groups that resulted in 253 actions or resolutions by the practice champions.                                                                                                                                                                                                                                                                |
| 11 |                         |             |      |                                                                                                                                                                                                                          |                                                                                                                                                                                                                                                                   |                                                                             |                                                      |     |     |     |    |                                                                                                                                                                                                                                                                                                                                                                                                                                                                                                                                                         |
| 12 |                         |             |      |                                                                                                                                                                                                                          |                                                                                                                                                                                                                                                                   |                                                                             |                                                      |     |     |     |    |                                                                                                                                                                                                                                                                                                                                                                                                                                                                                                                                                         |
| 13 |                         |             |      |                                                                                                                                                                                                                          |                                                                                                                                                                                                                                                                   |                                                                             |                                                      |     |     |     |    |                                                                                                                                                                                                                                                                                                                                                                                                                                                                                                                                                         |
| 14 |                         |             |      |                                                                                                                                                                                                                          |                                                                                                                                                                                                                                                                   |                                                                             |                                                      |     |     |     |    |                                                                                                                                                                                                                                                                                                                                                                                                                                                                                                                                                         |
| 15 |                         |             |      |                                                                                                                                                                                                                          |                                                                                                                                                                                                                                                                   |                                                                             |                                                      |     |     |     |    |                                                                                                                                                                                                                                                                                                                                                                                                                                                                                                                                                         |
| 16 |                         |             |      |                                                                                                                                                                                                                          |                                                                                                                                                                                                                                                                   |                                                                             |                                                      |     |     |     |    |                                                                                                                                                                                                                                                                                                                                                                                                                                                                                                                                                         |
| 17 |                         |             |      |                                                                                                                                                                                                                          |                                                                                                                                                                                                                                                                   |                                                                             |                                                      |     |     |     |    |                                                                                                                                                                                                                                                                                                                                                                                                                                                                                                                                                         |
| 18 |                         |             |      |                                                                                                                                                                                                                          |                                                                                                                                                                                                                                                                   |                                                                             |                                                      |     |     |     |    |                                                                                                                                                                                                                                                                                                                                                                                                                                                                                                                                                         |
| 19 |                         |             |      |                                                                                                                                                                                                                          |                                                                                                                                                                                                                                                                   |                                                                             |                                                      |     |     |     |    |                                                                                                                                                                                                                                                                                                                                                                                                                                                                                                                                                         |
| 20 |                         |             |      |                                                                                                                                                                                                                          |                                                                                                                                                                                                                                                                   |                                                                             |                                                      |     |     |     |    |                                                                                                                                                                                                                                                                                                                                                                                                                                                                                                                                                         |
| 21 |                         |             |      |                                                                                                                                                                                                                          |                                                                                                                                                                                                                                                                   |                                                                             |                                                      |     |     |     |    |                                                                                                                                                                                                                                                                                                                                                                                                                                                                                                                                                         |
| 22 |                         |             |      |                                                                                                                                                                                                                          |                                                                                                                                                                                                                                                                   |                                                                             |                                                      |     |     |     |    |                                                                                                                                                                                                                                                                                                                                                                                                                                                                                                                                                         |
| 23 |                         |             |      |                                                                                                                                                                                                                          |                                                                                                                                                                                                                                                                   |                                                                             |                                                      |     |     |     |    |                                                                                                                                                                                                                                                                                                                                                                                                                                                                                                                                                         |
| 24 |                         |             |      |                                                                                                                                                                                                                          |                                                                                                                                                                                                                                                                   |                                                                             |                                                      |     |     |     |    |                                                                                                                                                                                                                                                                                                                                                                                                                                                                                                                                                         |
| 25 | <b>Sijbrandij, 2020</b> | Netherlands | EVD  | Nurses, community HCW, midwives, maternal health assistant, vaccinators, lab assistant, etc                                                                                                                              | Knowledge: psychological first aid (PFA)                                                                                                                                                                                                                          | Traditional didactics                                                       | one day (no. of hours not mentioned)                 | 1.5 | 1.3 | 0.5 | 2b | Overall knowledge of appropriate psychosocial responses we found a significant effect of time, which was moderated by condition (X2(2) = 28.63; p < 0.0001). In the PFA group, knowledge about appropriate psychosocial responses increased relative to the control group. Post-hoc contrasts showed a medium to large effect size at the post-PFA assessment (mean estimated difference 1.73; d = 0.50; t(486.01) = 4.54; p < 0.001) and a medium effect size at the follow-up (mean estimated difference 1.54; d = 0.43; t(329.28) = 3.87; p = 0.001. |
| 26 |                         |             |      |                                                                                                                                                                                                                          |                                                                                                                                                                                                                                                                   |                                                                             |                                                      |     |     |     |    |                                                                                                                                                                                                                                                                                                                                                                                                                                                                                                                                                         |
| 27 |                         |             |      |                                                                                                                                                                                                                          |                                                                                                                                                                                                                                                                   |                                                                             |                                                      |     |     |     |    |                                                                                                                                                                                                                                                                                                                                                                                                                                                                                                                                                         |
| 28 |                         |             |      |                                                                                                                                                                                                                          |                                                                                                                                                                                                                                                                   |                                                                             |                                                      |     |     |     |    |                                                                                                                                                                                                                                                                                                                                                                                                                                                                                                                                                         |
| 29 |                         |             |      |                                                                                                                                                                                                                          |                                                                                                                                                                                                                                                                   |                                                                             |                                                      |     |     |     |    |                                                                                                                                                                                                                                                                                                                                                                                                                                                                                                                                                         |
| 30 |                         |             |      |                                                                                                                                                                                                                          |                                                                                                                                                                                                                                                                   |                                                                             |                                                      |     |     |     |    |                                                                                                                                                                                                                                                                                                                                                                                                                                                                                                                                                         |
| 31 |                         |             |      |                                                                                                                                                                                                                          |                                                                                                                                                                                                                                                                   |                                                                             |                                                      |     |     |     |    |                                                                                                                                                                                                                                                                                                                                                                                                                                                                                                                                                         |
| 32 |                         |             |      |                                                                                                                                                                                                                          |                                                                                                                                                                                                                                                                   |                                                                             |                                                      |     |     |     |    |                                                                                                                                                                                                                                                                                                                                                                                                                                                                                                                                                         |
| 33 |                         |             |      |                                                                                                                                                                                                                          |                                                                                                                                                                                                                                                                   |                                                                             |                                                      |     |     |     |    |                                                                                                                                                                                                                                                                                                                                                                                                                                                                                                                                                         |
| 34 |                         |             |      |                                                                                                                                                                                                                          |                                                                                                                                                                                                                                                                   |                                                                             |                                                      |     |     |     |    |                                                                                                                                                                                                                                                                                                                                                                                                                                                                                                                                                         |
| 35 |                         |             |      |                                                                                                                                                                                                                          |                                                                                                                                                                                                                                                                   |                                                                             |                                                      |     |     |     |    |                                                                                                                                                                                                                                                                                                                                                                                                                                                                                                                                                         |
| 36 | <b>Soeters, 2018</b>    | USA         | EVD  | Doctors, nurses, pharmacists, laboratorian, health tech, midwife, admin, students,                                                                                                                                       | Knowledge on IPC; Technical skills: donning and doffing of PPE, triage, waste management                                                                                                                                                                          | Traditional didactics; hands-on training                                    | First course: 3-days Second course: condensed 2 days | 2.0 | 1.3 | 1.5 | 2b | Median test scores increased from 40% among HCW, 15% among IPC trainers, and 21% (among IPC supervisors to post-training test scores of 83%, 93%, and 93%, respectively (all p<0.0001).                                                                                                                                                                                                                                                                                                                                                                 |
| 37 |                         |             |      |                                                                                                                                                                                                                          |                                                                                                                                                                                                                                                                   |                                                                             |                                                      |     |     |     |    |                                                                                                                                                                                                                                                                                                                                                                                                                                                                                                                                                         |
| 38 |                         |             |      |                                                                                                                                                                                                                          |                                                                                                                                                                                                                                                                   |                                                                             |                                                      |     |     |     |    |                                                                                                                                                                                                                                                                                                                                                                                                                                                                                                                                                         |
| 39 |                         |             |      |                                                                                                                                                                                                                          |                                                                                                                                                                                                                                                                   |                                                                             |                                                      |     |     |     |    |                                                                                                                                                                                                                                                                                                                                                                                                                                                                                                                                                         |
| 40 |                         |             |      |                                                                                                                                                                                                                          |                                                                                                                                                                                                                                                                   |                                                                             |                                                      |     |     |     |    |                                                                                                                                                                                                                                                                                                                                                                                                                                                                                                                                                         |
| 41 |                         |             |      |                                                                                                                                                                                                                          |                                                                                                                                                                                                                                                                   |                                                                             |                                                      |     |     |     |    |                                                                                                                                                                                                                                                                                                                                                                                                                                                                                                                                                         |

|    |                     |        |                 |                                                                                                            |                                                                                                                                                                                                                                                                                                                               |                                                                                                               |                               |     |      |     |    |                                                                                                                                                                                                                                                                                                                                                                                                                                                                                                                                                                                                                                     |
|----|---------------------|--------|-----------------|------------------------------------------------------------------------------------------------------------|-------------------------------------------------------------------------------------------------------------------------------------------------------------------------------------------------------------------------------------------------------------------------------------------------------------------------------|---------------------------------------------------------------------------------------------------------------|-------------------------------|-----|------|-----|----|-------------------------------------------------------------------------------------------------------------------------------------------------------------------------------------------------------------------------------------------------------------------------------------------------------------------------------------------------------------------------------------------------------------------------------------------------------------------------------------------------------------------------------------------------------------------------------------------------------------------------------------|
|    |                     |        | cleaner, others |                                                                                                            |                                                                                                                                                                                                                                                                                                                               |                                                                                                               |                               |     |      |     |    |                                                                                                                                                                                                                                                                                                                                                                                                                                                                                                                                                                                                                                     |
| 1  |                     |        |                 |                                                                                                            |                                                                                                                                                                                                                                                                                                                               |                                                                                                               |                               |     |      |     |    |                                                                                                                                                                                                                                                                                                                                                                                                                                                                                                                                                                                                                                     |
| 2  |                     |        |                 |                                                                                                            |                                                                                                                                                                                                                                                                                                                               |                                                                                                               |                               |     |      |     |    |                                                                                                                                                                                                                                                                                                                                                                                                                                                                                                                                                                                                                                     |
| 3  |                     |        |                 |                                                                                                            |                                                                                                                                                                                                                                                                                                                               |                                                                                                               |                               |     |      |     |    |                                                                                                                                                                                                                                                                                                                                                                                                                                                                                                                                                                                                                                     |
| 4  |                     |        |                 |                                                                                                            |                                                                                                                                                                                                                                                                                                                               |                                                                                                               |                               |     |      |     |    |                                                                                                                                                                                                                                                                                                                                                                                                                                                                                                                                                                                                                                     |
| 5  |                     |        |                 |                                                                                                            |                                                                                                                                                                                                                                                                                                                               |                                                                                                               |                               |     |      |     |    |                                                                                                                                                                                                                                                                                                                                                                                                                                                                                                                                                                                                                                     |
| 6  | <b>Watson, 2011</b> | USA    | H1N1            | Doctors, nurses, respiratory therapist, support technicians, pharmacists, physician extenders and students | Technical skill: PPE adherence                                                                                                                                                                                                                                                                                                | Simulation-based training (in-situ)                                                                           | 8-week observation period     | 2.0 | 1.3  | 1.0 | 2b | Observed adherence with PPE use= 61% for eye shields, 81% for filtering facepiece respirators or powered air-purifying respirators, and 87% for gown/gloves. Use of a "gatekeeper" to control access and facilitate donning of PPE was associated with 100% adherence with gown and respirator precautions and improved respirator adherence. All simulations showed deviation from pediatric basic life support protocols. The median time to bag-valve-mask ventilation improved from 4.3 to 2.7 minutes with a gatekeeper present. Confidence in PPE use improved from 64% to 85% after the mock code and structured debriefing. |
| 7  |                     |        |                 |                                                                                                            |                                                                                                                                                                                                                                                                                                                               |                                                                                                               |                               |     |      |     |    |                                                                                                                                                                                                                                                                                                                                                                                                                                                                                                                                                                                                                                     |
| 8  |                     |        |                 |                                                                                                            |                                                                                                                                                                                                                                                                                                                               |                                                                                                               |                               |     |      |     |    |                                                                                                                                                                                                                                                                                                                                                                                                                                                                                                                                                                                                                                     |
| 9  |                     |        |                 |                                                                                                            |                                                                                                                                                                                                                                                                                                                               |                                                                                                               |                               |     |      |     |    |                                                                                                                                                                                                                                                                                                                                                                                                                                                                                                                                                                                                                                     |
| 10 |                     |        |                 |                                                                                                            |                                                                                                                                                                                                                                                                                                                               |                                                                                                               |                               |     |      |     |    |                                                                                                                                                                                                                                                                                                                                                                                                                                                                                                                                                                                                                                     |
| 11 |                     |        |                 |                                                                                                            |                                                                                                                                                                                                                                                                                                                               |                                                                                                               |                               |     |      |     |    |                                                                                                                                                                                                                                                                                                                                                                                                                                                                                                                                                                                                                                     |
| 12 |                     |        |                 |                                                                                                            |                                                                                                                                                                                                                                                                                                                               |                                                                                                               |                               |     |      |     |    |                                                                                                                                                                                                                                                                                                                                                                                                                                                                                                                                                                                                                                     |
| 13 |                     |        |                 |                                                                                                            |                                                                                                                                                                                                                                                                                                                               |                                                                                                               |                               |     |      |     |    |                                                                                                                                                                                                                                                                                                                                                                                                                                                                                                                                                                                                                                     |
| 14 |                     |        |                 |                                                                                                            |                                                                                                                                                                                                                                                                                                                               |                                                                                                               |                               |     |      |     |    |                                                                                                                                                                                                                                                                                                                                                                                                                                                                                                                                                                                                                                     |
| 15 |                     |        |                 |                                                                                                            |                                                                                                                                                                                                                                                                                                                               |                                                                                                               |                               |     |      |     |    |                                                                                                                                                                                                                                                                                                                                                                                                                                                                                                                                                                                                                                     |
| 16 | <b>Wu, 2009</b>     | Taiwan | SARS            | Nurses                                                                                                     | Knowledge on IPC                                                                                                                                                                                                                                                                                                              | Formal lectures, hands-on demonstrations, simulation scenarios, role play, brainstorming and group discussion | 1-hour/week (total 16 hours). | 1.5 | 1.3  | 0.5 | 2b | Intervention cohort improved significantly on pre- to post-training test and follow-up test (8.87, 9.85, 11.00 points, respectively) compared with the control cohort (8.87, 8.67, 8.70 points, respectively).                                                                                                                                                                                                                                                                                                                                                                                                                      |
| 17 |                     |        |                 |                                                                                                            |                                                                                                                                                                                                                                                                                                                               |                                                                                                               |                               |     |      |     |    |                                                                                                                                                                                                                                                                                                                                                                                                                                                                                                                                                                                                                                     |
| 18 |                     |        |                 |                                                                                                            |                                                                                                                                                                                                                                                                                                                               |                                                                                                               |                               |     |      |     |    |                                                                                                                                                                                                                                                                                                                                                                                                                                                                                                                                                                                                                                     |
| 19 |                     |        |                 |                                                                                                            |                                                                                                                                                                                                                                                                                                                               |                                                                                                               |                               |     |      |     |    |                                                                                                                                                                                                                                                                                                                                                                                                                                                                                                                                                                                                                                     |
| 20 |                     |        |                 |                                                                                                            |                                                                                                                                                                                                                                                                                                                               |                                                                                                               |                               |     |      |     |    |                                                                                                                                                                                                                                                                                                                                                                                                                                                                                                                                                                                                                                     |
| 21 |                     |        |                 |                                                                                                            |                                                                                                                                                                                                                                                                                                                               |                                                                                                               |                               |     |      |     |    |                                                                                                                                                                                                                                                                                                                                                                                                                                                                                                                                                                                                                                     |
| 22 |                     |        |                 |                                                                                                            |                                                                                                                                                                                                                                                                                                                               |                                                                                                               |                               |     |      |     |    |                                                                                                                                                                                                                                                                                                                                                                                                                                                                                                                                                                                                                                     |
| 23 | <b>Zhou, 2020</b>   | China  | COVI D-19       | Nurses and nursing students                                                                                | Knowledge: emergency and critical care nursing; Technical skills: CPR, use of defibrillator, use of ECG, collection of various specimens, artificial airway techniques, usage of oropharyngeal ventilation tube and mask; gastric lavage technology of gastric lavage machine; Hemostasis, bandaging, and fixation technology | Traditional didactics and simulation-based training; micro-video (webcasts)                                   | 10-hr class sessions          | 2   | 1.75 | 2   | 2b | The total scores of theoretical assessment and practical assessment were 60 and 40, respectively, with 100 points in total. For the theory and practice of group 2: no significant difference between the two groups in terms of theory and practice (p = 0.654; p = 0.813; p = 0.180 Teaching satisfaction: the interns' teaching satisfaction of group 2 was higher than that of group 1: There was overall satisfaction; significant difference between the two groups (p = 0.020, p = 0.039; p = 0.012; p = 0.029). There was no significant difference in content rationality between the two groups                           |
| 24 |                     |        |                 |                                                                                                            |                                                                                                                                                                                                                                                                                                                               |                                                                                                               |                               |     |      |     |    |                                                                                                                                                                                                                                                                                                                                                                                                                                                                                                                                                                                                                                     |
| 25 |                     |        |                 |                                                                                                            |                                                                                                                                                                                                                                                                                                                               |                                                                                                               |                               |     |      |     |    |                                                                                                                                                                                                                                                                                                                                                                                                                                                                                                                                                                                                                                     |
| 26 |                     |        |                 |                                                                                                            |                                                                                                                                                                                                                                                                                                                               |                                                                                                               |                               |     |      |     |    |                                                                                                                                                                                                                                                                                                                                                                                                                                                                                                                                                                                                                                     |
| 27 |                     |        |                 |                                                                                                            |                                                                                                                                                                                                                                                                                                                               |                                                                                                               |                               |     |      |     |    |                                                                                                                                                                                                                                                                                                                                                                                                                                                                                                                                                                                                                                     |
| 28 |                     |        |                 |                                                                                                            |                                                                                                                                                                                                                                                                                                                               |                                                                                                               |                               |     |      |     |    |                                                                                                                                                                                                                                                                                                                                                                                                                                                                                                                                                                                                                                     |
| 29 |                     |        |                 |                                                                                                            |                                                                                                                                                                                                                                                                                                                               |                                                                                                               |                               |     |      |     |    |                                                                                                                                                                                                                                                                                                                                                                                                                                                                                                                                                                                                                                     |
| 30 |                     |        |                 |                                                                                                            |                                                                                                                                                                                                                                                                                                                               |                                                                                                               |                               |     |      |     |    |                                                                                                                                                                                                                                                                                                                                                                                                                                                                                                                                                                                                                                     |
| 31 |                     |        |                 |                                                                                                            |                                                                                                                                                                                                                                                                                                                               |                                                                                                               |                               |     |      |     |    |                                                                                                                                                                                                                                                                                                                                                                                                                                                                                                                                                                                                                                     |
| 32 |                     |        |                 |                                                                                                            |                                                                                                                                                                                                                                                                                                                               |                                                                                                               |                               |     |      |     |    |                                                                                                                                                                                                                                                                                                                                                                                                                                                                                                                                                                                                                                     |
| 33 |                     |        |                 |                                                                                                            |                                                                                                                                                                                                                                                                                                                               |                                                                                                               |                               |     |      |     |    |                                                                                                                                                                                                                                                                                                                                                                                                                                                                                                                                                                                                                                     |
| 34 |                     |        |                 |                                                                                                            |                                                                                                                                                                                                                                                                                                                               |                                                                                                               |                               |     |      |     |    |                                                                                                                                                                                                                                                                                                                                                                                                                                                                                                                                                                                                                                     |
| 35 |                     |        |                 |                                                                                                            |                                                                                                                                                                                                                                                                                                                               |                                                                                                               |                               |     |      |     |    |                                                                                                                                                                                                                                                                                                                                                                                                                                                                                                                                                                                                                                     |
| 36 |                     |        |                 |                                                                                                            |                                                                                                                                                                                                                                                                                                                               |                                                                                                               |                               |     |      |     |    |                                                                                                                                                                                                                                                                                                                                                                                                                                                                                                                                                                                                                                     |
| 37 |                     |        |                 |                                                                                                            |                                                                                                                                                                                                                                                                                                                               |                                                                                                               |                               |     |      |     |    |                                                                                                                                                                                                                                                                                                                                                                                                                                                                                                                                                                                                                                     |
| 38 |                     |        |                 |                                                                                                            |                                                                                                                                                                                                                                                                                                                               |                                                                                                               |                               |     |      |     |    |                                                                                                                                                                                                                                                                                                                                                                                                                                                                                                                                                                                                                                     |
| 39 |                     |        |                 |                                                                                                            |                                                                                                                                                                                                                                                                                                                               |                                                                                                               |                               |     |      |     |    |                                                                                                                                                                                                                                                                                                                                                                                                                                                                                                                                                                                                                                     |
| 40 |                     |        |                 |                                                                                                            |                                                                                                                                                                                                                                                                                                                               |                                                                                                               |                               |     |      |     |    |                                                                                                                                                                                                                                                                                                                                                                                                                                                                                                                                                                                                                                     |
| 41 |                     |        |                 |                                                                                                            |                                                                                                                                                                                                                                                                                                                               |                                                                                                               |                               |     |      |     |    |                                                                                                                                                                                                                                                                                                                                                                                                                                                                                                                                                                                                                                     |
| 42 |                     |        |                 |                                                                                                            |                                                                                                                                                                                                                                                                                                                               |                                                                                                               |                               |     |      |     |    |                                                                                                                                                                                                                                                                                                                                                                                                                                                                                                                                                                                                                                     |
| 43 |                     |        |                 |                                                                                                            |                                                                                                                                                                                                                                                                                                                               |                                                                                                               |                               |     |      |     |    |                                                                                                                                                                                                                                                                                                                                                                                                                                                                                                                                                                                                                                     |
| 44 |                     |        |                 |                                                                                                            |                                                                                                                                                                                                                                                                                                                               |                                                                                                               |                               |     |      |     |    |                                                                                                                                                                                                                                                                                                                                                                                                                                                                                                                                                                                                                                     |
| 45 |                     |        |                 |                                                                                                            |                                                                                                                                                                                                                                                                                                                               |                                                                                                               |                               |     |      |     |    |                                                                                                                                                                                                                                                                                                                                                                                                                                                                                                                                                                                                                                     |
| 46 |                     |        |                 |                                                                                                            |                                                                                                                                                                                                                                                                                                                               |                                                                                                               |                               |     |      |     |    |                                                                                                                                                                                                                                                                                                                                                                                                                                                                                                                                                                                                                                     |

1 § **Quality Appraisal using the Educational intervention checklist**<sup>12</sup>. Each item is assigned a score of 0/1/2 (higher is better) based on descriptive anchors.

2 \* **Kirkpatrick levels**<sup>13</sup>: Level 1=learner's view regarding the educational experience; level 2a=modification of behaviour or attitude; level 2b=acquisition or  
3 modification of knowledge/skills; level 3=actual behavioural change documented by transfer of learning to the workplace; level 4a=changes in organisational  
4 practice that are attributable to the intervention; and level 4b= outcomes at the level of patient health and well-being

5  
6 **Abbreviations:** SARS- severe acute respiratory syndrome; H1N1- H1N1 influenza virus infection; MERS- Middle East respiratory syndrome; EVD- Ebola  
7 virus disease; COVID-19- corona virus disease 2019; HCW – healthcare workers; PPE – personal protective equipment; IPC – infection prevention and control;  
8 ECMO – extracorporeal membrane oxygenation; SBT – simulation-based training; CPR- Cardiopulmonary resuscitation; ECG- electrocardiogram  
9

10  
11  
12  
13  
14  
15  
16  
17  
18  
19  
20  
21  
22  
23  
24  
25  
26  
27  
28  
29  
30  
31  
32  
33  
34  
35  
36  
37  
38  
39  
40  
41  
42  
43  
44  
45  
46

For peer review only

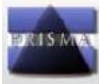

# PRISMA 2009 Checklist

1  
2  
3  
4  
5  
6  
7  
8  
9  
10  
11  
12  
13  
14  
15  
16  
17  
18  
19  
20  
21  
22  
23  
24  
25  
26  
27  
28  
29  
30  
31  
32  
33  
34  
35  
36  
37  
38  
39  
40  
41  
42  
43  
44  
45  
46  
47

| Section/topic                      | #  | Checklist item                                                                                                                                                                                                                                                                                              | Reported on page # |
|------------------------------------|----|-------------------------------------------------------------------------------------------------------------------------------------------------------------------------------------------------------------------------------------------------------------------------------------------------------------|--------------------|
| <b>TITLE</b>                       |    |                                                                                                                                                                                                                                                                                                             |                    |
| Title                              | 1  | Identify the report as a systematic review, meta-analysis, or both.                                                                                                                                                                                                                                         | 1                  |
| <b>ABSTRACT</b>                    |    |                                                                                                                                                                                                                                                                                                             |                    |
| Structured summary                 | 2  | Provide a structured summary including, as applicable: background; objectives; data sources; study eligibility criteria, participants, and interventions; study appraisal and synthesis methods; results; limitations; conclusions and implications of key findings; systematic review registration number. | 2                  |
| <b>INTRODUCTION</b>                |    |                                                                                                                                                                                                                                                                                                             |                    |
| Rationale                          | 3  | Describe the rationale for the review in the context of what is already known.                                                                                                                                                                                                                              | 4                  |
| Objectives                         | 4  | Provide an explicit statement of questions being addressed with reference to participants, interventions, comparisons, outcomes, and study design (PICOS).                                                                                                                                                  | 4-5                |
| <b>METHODS</b>                     |    |                                                                                                                                                                                                                                                                                                             |                    |
| Protocol and registration          | 5  | Indicate if a review protocol exists, if and where it can be accessed (e.g., Web address), and, if available, provide registration information including registration number.                                                                                                                               | -                  |
| Eligibility criteria               | 6  | Specify study characteristics (e.g., PICOS, length of follow-up) and report characteristics (e.g., years considered, language, publication status) used as criteria for eligibility, giving rationale.                                                                                                      | 6                  |
| Information sources                | 7  | Describe all information sources (e.g., databases with dates of coverage, contact with study authors to identify additional studies) in the search and date last searched.                                                                                                                                  | 6                  |
| Search                             | 8  | Present full electronic search strategy for at least one database, including any limits used, such that it could be repeated.                                                                                                                                                                               | 6                  |
| Study selection                    | 9  | State the process for selecting studies (i.e., screening, eligibility, included in systematic review, and, if applicable, included in the meta-analysis).                                                                                                                                                   | 6                  |
| Data collection process            | 10 | Describe method of data extraction from reports (e.g., piloted forms, independently, in duplicate) and any processes for obtaining and confirming data from investigators.                                                                                                                                  | 7                  |
| Data items                         | 11 | List and define all variables for which data were sought (e.g., PICOS, funding sources) and any assumptions and simplifications made.                                                                                                                                                                       | 7                  |
| Risk of bias in individual studies | 12 | Describe methods used for assessing risk of bias of individual studies (including specification of whether this was done at the study or outcome level), and how this information is to be used in any data synthesis.                                                                                      | 7                  |
| Summary measures                   | 13 | State the principal summary measures (e.g., risk ratio, difference in means).                                                                                                                                                                                                                               | -                  |
| Synthesis of results               | 14 | Describe the methods of handling data and combining results of studies, if done, including measures of consistency (e.g., $I^2$ ) for each meta-analysis.                                                                                                                                                   | 7                  |

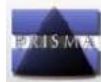

# PRISMA 2009 Checklist

Page 1 of 2

| Section/topic                 | #  | Checklist item                                                                                                                                                                                           | Reported on page # |
|-------------------------------|----|----------------------------------------------------------------------------------------------------------------------------------------------------------------------------------------------------------|--------------------|
| Risk of bias across studies   | 15 | Specify any assessment of risk of bias that may affect the cumulative evidence (e.g., publication bias, selective reporting within studies).                                                             | -                  |
| Additional analyses           | 16 | Describe methods of additional analyses (e.g., sensitivity or subgroup analyses, meta-regression), if done, indicating which were pre-specified.                                                         | -                  |
| <b>RESULTS</b>                |    |                                                                                                                                                                                                          |                    |
| Study selection               | 17 | Give numbers of studies screened, assessed for eligibility, and included in the review, with reasons for exclusions at each stage, ideally with a flow diagram.                                          | 8                  |
| Study characteristics         | 18 | For each study, present characteristics for which data were extracted (e.g., study size, PICOS, follow-up period) and provide the citations.                                                             | 8                  |
| Risk of bias within studies   | 19 | Present data on risk of bias of each study and, if available, any outcome level assessment (see item 12).                                                                                                | -                  |
| Results of individual studies | 20 | For all outcomes considered (benefits or harms), present, for each study: (a) simple summary data for each intervention group (b) effect estimates and confidence intervals, ideally with a forest plot. | 8-11               |
| Synthesis of results          | 21 | Present results of each meta-analysis done, including confidence intervals and measures of consistency.                                                                                                  | 8-11               |
| Risk of bias across studies   | 22 | Present results of any assessment of risk of bias across studies (see Item 15).                                                                                                                          | -                  |
| Additional analysis           | 23 | Give results of additional analyses, if done (e.g., sensitivity or subgroup analyses, meta-regression [see Item 16]).                                                                                    | -                  |
| <b>DISCUSSION</b>             |    |                                                                                                                                                                                                          |                    |
| Summary of evidence           | 24 | Summarize the main findings including the strength of evidence for each main outcome; consider their relevance to key groups (e.g., healthcare providers, users, and policy makers).                     | 12-16              |
| Limitations                   | 25 | Discuss limitations at study and outcome level (e.g., risk of bias), and at review-level (e.g., incomplete retrieval of identified research, reporting bias).                                            | 16                 |
| Conclusions                   | 26 | Provide a general interpretation of the results in the context of other evidence, and implications for future research.                                                                                  | 17                 |
| <b>FUNDING</b>                |    |                                                                                                                                                                                                          |                    |
| Funding                       | 27 | Describe sources of funding for the systematic review and other support (e.g., supply of data); role of funders for the systematic review.                                                               | 18                 |

From: Moher D, Liberati A, Tetzlaff J, Altman DG, The PRISMA Group (2009). Preferred Reporting Items for Systematic Reviews and Meta-Analyses: The PRISMA Statement. PLoS Med 6(7): e1000097. doi:10.1371/journal.pmed1000097

For more information, visit: [www.prisma-statement.org](http://www.prisma-statement.org).

Page 2 of 2

For peer review only - <http://bmjopen.bmj.com/site/about/guidelines.xhtml>
